# Supplementary material for: Elevated Interarm Systolic Blood Pressure Difference Is Positively Associated with Increased Likelihood of Coronary Artery Disease
Source: Hindawi journal article supplement (doi:10.1155/2021/5577957), 2021-07-21
Supplement: f1 [file 5577957.f1.zip]

| Number | Sex    | Age | Height | Weight | BMI (kg/m <sup>2</sup> ) | Antihypertensive | Lipid-lowering | BMI (1=No, 2=Yes) | Hypertension | Diabetes | Smoking (1=Yes, 2=No) |
|--------|--------|-----|--------|--------|--------------------------|------------------|----------------|-------------------|--------------|----------|-----------------------|
| 1      | Male   | 71  | 173    | 64.5   | 21.55                    | 1                | 1              | 1                 | 1            | 2        | 1                     |
| 2      | Female | 72  | 155    | 85     | 35.38                    | 1                | 1              | 3                 | 1            | 1        | 2                     |
| 3      | Female | 61  | 162    | 61.5   | 23.43                    | 1                | 1              | 1                 | 1            | 2        | 2                     |
| 4      | Female | 85  | 155    | 58     | 24.14                    | 1                | 1              | 2                 | 1            | 1        | 1                     |
| 5      | Female | 62  | 157    | 58     | 23.53                    | 2                | 1              | 1                 | 2            | 2        | 2                     |
| 6      | Male   | 46  | 172    | 84     | 28.39                    | 1                | 1              | 3                 | 1            | 2        | 1                     |
| 7      | Male   | 60  | 173    | 78     | 26.06                    | 2                | 1              | 2                 | 2            | 2        | 1                     |
| 8      | Female | 58  | 162    | 80     | 30.48                    | 2                | 1              | 3                 | 1            | 1        | 2                     |
| 9      | Female | 60  | 161    | 80     | 30.86                    | 1                | 1              | 3                 | 1            | 2        | 2                     |
| 10     | Female | 61  | 158    | 50     | 20.03                    | 2                | 2              | 1                 | 2            | 2        | 2                     |
| 11     | Male   | 53  | 173    | 90     | 30.07                    | 1                | 1              | 3                 | 1            | 1        | 1                     |
| 12     | Male   | 37  | 180    | 120    | 37.04                    | 1                | 1              | 3                 | 1            | 1        | 1                     |
| 13     | Male   | 64  | 168    | 70     | 24.80                    | 1                | 1              | 2                 | 1            | 2        | 1                     |
| 14     | Male   | 56  | 176    | 66     | 21.31                    | 2                | 2              | 1                 | 1            | 2        | 2                     |
| 15     | Male   | 50  | 170    | 62     | 21.45                    | 1                | 1              | 1                 | 1            | 2        | 1                     |
| 16     | Male   | 57  | 162    | 70     | 26.67                    | 2                | 2              | 2                 | 1            | 1        | 1                     |
| 17     | Male   | 51  | 171    | 76     | 25.99                    | 2                | 2              | 2                 | 2            | 1        | 2                     |
| 18     | Female | 61  | 150    | 63     | 28.00                    | 1                | 1              | 3                 | 1            | 2        | 2                     |
| 19     | Female | 52  | 169    | 59     | 20.66                    | 1                | 2              | 1                 | 1            | 1        | 2                     |
| 20     | Female | 82  | 145    | 50     | 23.78                    | 2                | 2              | 1                 | 2            | 1        | 2                     |
| 21     | Female | 57  | 157    | 65     | 26.37                    | 2                | 2              | 2                 | 1            | 1        | 2                     |
| 22     | Male   | 56  | 173    | 100    | 33.41                    | 1                | 2              | 3                 | 1            | 1        | 1                     |
| 23     | Female | 42  | 155    | 64     | 26.64                    | 1                | 2              | 2                 | 1            | 2        | 2                     |
| 24     | Male   | 54  | 165    | 75     | 27.55                    | 1                | 2              | 2                 | 1            | 1        | 2                     |
| 25     | Female | 72  | 162    | 61     | 23.24                    | 2                | 2              | 1                 | 2            | 2        | 2                     |
| 26     | Female | 81  | 155    | 67     | 27.89                    | 1                | 2              | 2                 | 1            | 1        | 2                     |
| 27     | Male   | 41  | 170    | 73     | 25.26                    | 1                | 2              | 2                 | 1            | 2        | 2                     |
| 28     | Female | 52  | 163    | 64     | 24.09                    | 1                | 2              | 2                 | 1            | 2        | 2                     |
| 29     | Male   | 75  | 163    | 70     | 26.35                    | 2                | 1              | 2                 | 1            | 2        | 1                     |
| 30     | Male   | 66  | 172    | 69     | 23.32                    | 1                | 1              | 1                 | 1            | 2        | 2                     |
| 31     | Female | 25  | 159    | 70     | 27.69                    | 1                | 1              | 2                 | 1            | 2        | 2                     |
| 32     | Male   | 79  | 170    | 87     | 30.10                    | 1                | 1              | 3                 | 1            | 2        | 2                     |
| 33     | Male   | 63  | 176    | 110    | 35.51                    | 1                | 1              | 3                 | 1            | 1        | 1                     |
| 34     | Male   | 74  | 175    | 82     | 26.78                    | 1                | 1              | 2                 | 1            | 2        | 1                     |
| 35     | Female | 56  | 158    | 60     | 24.03                    | 1                | 1              | 2                 | 1            | 2        | 2                     |
| 36     | Female | 80  | 160    | 50     | 19.53                    | 2                | 1              | 1                 | 2            | 2        | 1                     |
| 37     | Female | 61  | 160    | 78     | 30.47                    | 2                | 2              | 3                 | 1            | 2        | 2                     |
| 38     | Male   | 62  | 170    | 73.5   | 25.43                    | 1                | 1              | 2                 | 1            | 1        | 1                     |
| 39     | Male   | 65  | 174    | 98     | 32.37                    | 1                | 1              | 3                 | 1            | 1        | 1                     |

|           |    |     |      |       |   |   |   |   |   |   |
|-----------|----|-----|------|-------|---|---|---|---|---|---|
| 40 Male   | 79 | 166 | 75   | 27.22 | 1 | 1 | 2 | 1 | 2 | 1 |
| 41 Male   | 70 | 172 | 73   | 24.68 | 2 | 2 | 2 | 2 | 2 | 1 |
| 42 Male   | 77 | 170 | 70   | 24.22 | 1 | 1 | 2 | 1 | 1 | 1 |
| 43 Female | 72 | 157 | 66   | 26.78 | 1 | 1 | 2 | 1 | 2 | 2 |
| 44 Female | 61 | 157 | 71   | 28.80 | 1 | 1 | 3 | 1 | 2 | 2 |
| 45 Female | 78 | 160 | 45   | 17.58 | 2 | 2 | 1 | 2 | 2 | 2 |
| 46 Male   | 62 | 165 | 65   | 23.88 | 1 | 1 | 1 | 1 | 1 | 2 |
| 47 Male   | 55 | 176 | 85   | 27.44 | 2 | 1 | 2 | 2 | 2 | 1 |
| 48 Female | 53 | 164 | 84   | 31.23 | 2 | 2 | 3 | 2 | 2 | 2 |
| 49 Male   | 67 | 156 | 70   | 28.76 | 2 | 2 | 3 | 2 | 1 | 2 |
| 50 Female | 54 | 153 | 58   | 24.78 | 1 | 2 | 2 | 1 | 2 | 2 |
| 51 Male   | 68 | 178 | 93   | 29.35 | 1 | 1 | 3 | 1 | 2 | 1 |
| 52 Male   | 45 | 170 | 67   | 23.18 | 2 | 1 | 1 | 2 | 1 | 1 |
| 53 Male   | 61 | 178 | 86   | 27.14 | 2 | 1 | 2 | 1 | 1 | 1 |
| 54 Male   | 53 | 165 | 65   | 23.88 | 2 | 2 | 1 | 2 | 2 | 1 |
| 55 Female | 71 | 171 | 101  | 34.54 | 1 | 1 | 3 | 1 | 2 | 2 |
| 56 Male   | 54 | 177 | 99   | 31.60 | 2 | 1 | 3 | 2 | 2 | 1 |
| 57 Male   | 65 | 164 | 65   | 24.17 | 2 | 2 | 2 | 2 | 1 | 1 |
| 58 Female | 69 | 147 | 75   | 34.71 | 1 | 1 | 3 | 1 | 1 | 2 |
| 59 Male   | 63 | 170 | 78   | 26.99 | 2 | 2 | 2 | 2 | 2 | 2 |
| 60 Male   | 67 | 170 | 74.5 | 25.78 | 1 | 1 | 2 | 1 | 1 | 1 |
| 61 Female | 69 | 162 | 59.5 | 22.67 | 1 | 2 | 1 | 1 | 2 | 2 |
| 62 Female | 69 | 156 | 76   | 31.23 | 1 | 2 | 3 | 1 | 2 | 1 |
| 63 Male   | 57 | 171 | 80.5 | 27.53 | 1 | 2 | 2 | 1 | 1 | 1 |
| 64 Female | 70 | 158 | 57   | 22.83 | 1 | 2 | 1 | 1 | 2 | 2 |
| 65 Male   | 59 | 168 | 74   | 26.22 | 2 | 1 | 2 | 2 | 2 | 2 |
| 66 Male   | 54 | 165 | 65   | 23.88 | 1 | 2 | 1 | 1 | 2 | 1 |
| 67 Female | 73 | 164 | 81   | 30.12 | 2 | 2 | 3 | 1 | 1 | 2 |
| 68 Male   | 54 | 175 | 92   | 30.04 | 2 | 2 | 3 | 2 | 1 | 1 |
| 69 Male   | 46 | 172 | 83   | 28.06 | 1 | 2 | 3 | 1 | 2 | 1 |
| 70 Female | 71 | 158 | 62   | 24.84 | 1 | 2 | 2 | 1 | 1 | 2 |
| 71 Male   | 51 | 168 | 73   | 25.86 | 1 | 2 | 2 | 1 | 2 | 1 |
| 72 Female | 56 | 157 | 55.5 | 22.52 | 1 | 1 | 1 | 1 | 1 | 2 |
| 73 Male   | 68 | 165 | 60   | 22.04 | 1 | 1 | 1 | 1 | 1 | 1 |
| 74 Male   | 55 | 176 | 93   | 30.02 | 2 | 1 | 3 | 2 | 2 | 1 |
| 75 Male   | 48 | 170 | 75   | 25.95 | 2 | 2 | 2 | 2 | 1 | 1 |
| 76 Male   | 62 | 174 | 75   | 24.77 | 1 | 1 | 2 | 1 | 2 | 1 |
| 77 Male   | 49 | 172 | 86   | 29.07 | 1 | 1 | 3 | 1 | 1 | 1 |
| 78 Male   | 55 | 170 | 61   | 21.11 | 1 | 2 | 1 | 1 | 2 | 1 |
| 79 Male   | 23 | 173 | 77   | 25.73 | 2 | 1 | 2 | 2 | 2 | 1 |

|            |    |     |      |       |   |   |   |   |   |   |
|------------|----|-----|------|-------|---|---|---|---|---|---|
| 80 Male    | 80 | 163 | 64.5 | 24.28 | 1 | 2 | 2 | 1 | 2 | 1 |
| 81 Female  | 71 | 163 | 61   | 22.96 | 1 | 1 | 1 | 1 | 2 | 2 |
| 82 Male    | 75 | 161 | 80   | 30.86 | 1 | 1 | 3 | 1 | 2 | 1 |
| 83 Male    | 48 | 173 | 80   | 26.73 | 2 | 2 | 2 | 1 | 2 | 1 |
| 84 Male    | 64 | 162 | 51   | 19.43 | 1 | 2 | 1 | 1 | 2 | 1 |
| 85 Female  | 68 | 163 | 78   | 29.36 | 1 | 2 | 3 | 1 | 2 | 2 |
| 86 Male    | 51 | 178 | 90   | 28.41 | 1 | 1 | 3 | 1 | 2 | 2 |
| 87 Male    | 64 | 182 | 106  | 32.00 | 1 | 2 | 3 | 1 | 1 | 1 |
| 88 Male    | 67 | 175 | 67   | 21.88 | 2 | 2 | 1 | 1 | 2 | 1 |
| 89 Female  | 61 | 155 | 65   | 27.06 | 1 | 2 | 2 | 1 | 2 | 2 |
| 90 Male    | 67 | 170 | 64   | 22.15 | 2 | 2 | 1 | 2 | 1 | 1 |
| 91 Male    | 63 | 173 | 68   | 22.72 | 2 | 2 | 1 | 2 | 1 | 1 |
| 92 Male    | 58 | 170 | 58   | 20.07 | 2 | 1 | 1 | 2 | 1 | 1 |
| 93 Female  | 57 | 163 | 62   | 23.34 | 1 | 2 | 1 | 1 | 2 | 2 |
| 94 Male    | 63 | 175 | 70   | 22.86 | 2 | 2 | 1 | 1 | 1 | 2 |
| 95 Female  | 72 | 162 | 70   | 26.67 | 1 | 1 | 2 | 1 | 2 | 2 |
| 96 Male    | 48 | 176 | 82   | 26.47 | 1 | 2 | 2 | 1 | 1 | 1 |
| 97 Male    | 72 | 175 | 98   | 32.00 | 2 | 2 | 3 | 2 | 1 | 1 |
| 98 Male    | 69 | 170 | 67   | 23.18 | 1 | 2 | 1 | 1 | 1 | 1 |
| 99 Male    | 56 | 163 | 92   | 34.63 | 1 | 1 | 3 | 1 | 2 | 1 |
| 100 Male   | 43 | 177 | 99   | 31.60 | 2 | 1 | 3 | 2 | 2 | 1 |
| 101 Female | 67 | 165 | 64   | 23.51 | 2 | 2 | 1 | 2 | 2 | 2 |
| 102 Male   | 60 | 170 | 75.5 | 26.12 | 1 | 2 | 2 | 1 | 2 | 1 |
| 103 Female | 33 | 166 | 55   | 19.96 | 2 | 2 | 1 | 1 | 1 | 2 |
| 104 Male   | 52 | 170 | 80   | 27.68 | 1 | 1 | 2 | 1 | 2 | 2 |
| 105 Male   | 75 | 172 | 78   | 26.37 | 1 | 2 | 2 | 1 | 2 | 1 |
| 106 Male   | 65 | 180 | 76   | 23.46 | 2 | 2 | 1 | 1 | 2 | 2 |
| 107 Male   | 75 | 161 | 61   | 23.53 | 2 | 2 | 1 | 2 | 2 | 2 |
| 108 Male   | 69 | 170 | 69   | 23.88 | 1 | 1 | 1 | 1 | 2 | 1 |
| 109 Male   | 64 | 170 | 83.2 | 28.79 | 1 | 1 | 3 | 1 | 1 | 1 |
| 110 Female | 74 | 167 | 71   | 25.46 | 1 | 1 | 2 | 1 | 1 | 2 |
| 111 Male   | 67 | 164 | 74   | 27.51 | 1 | 2 | 2 | 1 | 2 | 1 |
| 112 Male   | 51 | 178 | 77   | 24.30 | 1 | 2 | 2 | 1 | 2 | 1 |
| 113 Male   | 85 | 170 | 68.5 | 23.70 | 1 | 1 | 1 | 1 | 2 | 2 |
| 114 Male   | 58 | 183 | 98   | 29.26 | 2 | 1 | 3 | 2 | 2 | 1 |
| 115 Male   | 62 | 175 | 65   | 21.22 | 1 | 1 | 1 | 1 | 1 | 2 |
| 116 Male   | 76 | 165 | 86   | 31.59 | 1 | 1 | 3 | 1 | 2 | 2 |
| 117 Female | 71 | 150 | 42   | 18.67 | 1 | 2 | 1 | 1 | 2 | 2 |
| 118 Female | 60 | 162 | 51   | 19.43 | 2 | 1 | 1 | 1 | 2 | 2 |
| 119 Male   | 64 | 164 | 68   | 25.28 | 1 | 2 | 2 | 1 | 1 | 1 |

|     |        |    |       |      |       |   |   |   |   |   |   |
|-----|--------|----|-------|------|-------|---|---|---|---|---|---|
| 120 | Male   | 55 | 174   | 83   | 27.41 | 1 | 1 | 2 | 1 | 1 | 1 |
| 121 | Male   | 63 | 170   | 98   | 33.91 | 1 | 1 | 3 | 1 | 2 | 1 |
| 122 | Male   | 79 | 170   | 73   | 25.26 | 2 | 1 | 2 | 2 | 1 | 1 |
| 123 | Male   | 54 | 175   | 82   | 26.78 | 2 | 2 | 2 | 2 | 1 | 2 |
| 124 | Female | 72 | 156   | 55   | 22.60 | 1 | 2 | 1 | 1 | 1 | 2 |
| 125 | Female | 71 | 167   | 61   | 21.87 | 1 | 2 | 1 | 1 | 1 | 2 |
| 126 | Male   | 73 | 172   | 86   | 29.07 | 1 | 1 | 3 | 1 | 1 | 1 |
| 127 | Female | 73 | 170   | 70   | 24.22 | 1 | 2 | 2 | 1 | 2 | 2 |
| 128 | Male   | 41 | 168   | 82   | 29.05 | 2 | 1 | 3 | 2 | 2 | 1 |
| 129 | Male   | 69 | 172   | 72   | 24.34 | 1 | 1 | 2 | 1 | 2 | 1 |
| 130 | Male   | 61 | 175   | 89   | 29.06 | 1 | 1 | 3 | 1 | 1 | 1 |
| 131 | Male   | 60 | 170   | 89.5 | 30.97 | 1 | 1 | 3 | 1 | 1 | 1 |
| 132 | Male   | 81 | 165   | 70   | 25.71 | 1 | 1 | 2 | 1 | 1 | 2 |
| 133 | Male   | 77 | 163   | 73   | 27.48 | 1 | 2 | 2 | 1 | 2 | 2 |
| 134 | Male   | 72 | 170   | 70   | 24.22 | 1 | 1 | 2 | 1 | 2 | 1 |
| 135 | Female | 65 | 157   | 64   | 25.96 | 1 | 1 | 2 | 1 | 1 | 2 |
| 136 | Male   | 39 | 173   | 101  | 33.75 | 1 | 1 | 3 | 1 | 2 | 1 |
| 137 | Male   | 60 | 170   | 76   | 26.30 | 2 | 1 | 2 | 2 | 2 | 1 |
| 138 | Female | 84 | 150   | 52   | 23.11 | 1 | 2 | 1 | 1 | 2 | 2 |
| 139 | Male   | 64 | 176   | 80   | 25.83 | 2 | 2 | 2 | 2 | 2 | 2 |
| 140 | Female | 75 | 151   | 56.5 | 24.78 | 1 | 1 | 2 | 1 | 2 | 2 |
| 141 | Male   | 56 | 170   | 64   | 22.15 | 2 | 2 | 1 | 2 | 2 | 1 |
| 142 | Male   | 70 | 170   | 65   | 22.49 | 1 | 2 | 1 | 1 | 1 | 2 |
| 143 | Female | 59 | 159   | 73   | 28.88 | 2 | 2 | 3 | 1 | 2 | 2 |
| 144 | Female | 75 | 160   | 58   | 22.66 | 1 | 2 | 1 | 1 | 2 | 2 |
| 145 | Female | 81 | 155   | 67   | 27.89 | 1 | 2 | 2 | 1 | 1 | 2 |
| 146 | Male   | 63 | 170   | 83   | 28.72 | 1 | 1 | 3 | 1 | 2 | 2 |
| 147 | Female | 72 | 162   | 65   | 24.77 | 1 | 1 | 2 | 1 | 1 | 2 |
| 148 | Male   | 64 | 163.5 | 61.5 | 23.01 | 1 | 1 | 1 | 1 | 1 | 1 |
| 149 | Male   | 75 | 171   | 88   | 30.09 | 1 | 2 | 3 | 1 | 2 | 2 |
| 150 | Female | 64 | 162   | 68   | 25.91 | 1 | 2 | 2 | 1 | 1 | 2 |
| 151 | Male   | 68 | 174   | 75   | 24.77 | 1 | 2 | 2 | 1 | 2 | 1 |
| 152 | Male   | 57 | 160   | 65   | 25.39 | 1 | 1 | 2 | 1 | 2 | 2 |
| 153 | Male   | 58 | 168   | 80   | 28.34 | 1 | 1 | 3 | 1 | 1 | 1 |
| 154 | Male   | 57 | 162   | 64   | 24.39 | 2 | 2 | 2 | 1 | 2 | 1 |
| 155 | Male   | 55 | 177   | 67   | 21.39 | 1 | 2 | 1 | 1 | 2 | 1 |
| 156 | Female | 69 | 155   | 58   | 24.14 | 1 | 1 | 2 | 1 | 1 | 2 |
| 157 | Male   | 57 | 163   | 73   | 27.48 | 1 | 1 | 2 | 1 | 1 | 1 |
| 158 | Female | 53 | 167   | 70   | 25.10 | 2 | 1 | 2 | 2 | 2 | 2 |
| 159 | Male   | 67 | 175   | 80   | 26.12 | 1 | 2 | 2 | 1 | 1 | 2 |

|            |    |     |    |       |   |   |   |   |   |   |
|------------|----|-----|----|-------|---|---|---|---|---|---|
| 160 Male   | 51 | 180 | 90 | 27.78 | 1 | 1 | 2 | 1 | 1 | 1 |
| 161 Male   | 45 | 178 | 82 | 25.88 | 1 | 1 | 2 | 1 | 2 | 1 |
| 162 Male   | 60 | 168 | 70 | 24.80 | 1 | 2 | 2 | 1 | 1 | 1 |
| 163 Male   | 59 | 173 | 89 | 29.74 | 1 | 2 | 3 | 1 | 1 | 1 |
| 164 Male   | 63 | 162 | 92 | 35.06 | 1 | 2 | 3 | 1 | 1 | 1 |
| 165 Male   | 65 | 170 | 78 | 26.99 | 1 | 1 | 2 | 1 | 1 | 1 |
| 166 Male   | 60 | 175 | 85 | 27.76 | 1 | 1 | 2 | 1 | 2 | 1 |
| 167 Female | 54 | 160 | 62 | 24.22 | 2 | 2 | 2 | 2 | 1 | 2 |
| 168 Male   | 73 | 170 | 71 | 24.57 | 2 | 1 | 2 | 1 | 2 | 1 |
| 169 Female | 69 | 158 | 61 | 24.44 | 1 | 2 | 2 | 1 | 1 | 2 |
| 170 Male   | 53 | 165 | 70 | 25.71 | 2 | 1 | 2 | 2 | 2 | 1 |
| 171 Male   | 49 | 172 | 78 | 26.37 | 2 | 1 | 2 | 2 | 2 | 1 |
| 172 Female | 66 | 158 | 47 | 18.83 | 1 | 2 | 1 | 1 | 2 | 2 |
| 173 Male   | 62 | 170 | 80 | 27.68 | 1 | 2 | 2 | 1 | 1 | 1 |
| 174 Male   | 59 | 175 | 69 | 22.53 | 1 | 2 | 1 | 1 | 2 | 1 |
| 175 Male   | 62 | 174 | 90 | 29.73 | 1 | 1 | 3 | 1 | 1 | 1 |
| 176 Male   | 56 | 175 | 95 | 31.02 | 1 | 2 | 3 | 1 | 1 | 1 |
| 177 Male   | 39 | 165 | 77 | 28.28 | 1 | 2 | 3 | 1 | 2 | 1 |
| 178 Female | 69 | 162 | 70 | 26.67 | 1 | 2 | 2 | 1 | 2 | 2 |
| 179 Male   | 46 | 170 | 71 | 24.57 | 1 | 2 | 2 | 1 | 2 | 2 |
| 180 Male   | 73 | 174 | 65 | 21.47 | 2 | 2 | 1 | 1 | 2 | 1 |
| 181 Male   | 54 | 178 | 86 | 27.14 | 1 | 1 | 2 | 1 | 1 | 1 |
| 182 Male   | 78 | 170 | 70 | 24.22 | 1 | 1 | 2 | 1 | 1 | 1 |
| 183 Female | 71 | 155 | 62 | 25.81 | 2 | 2 | 2 | 1 | 2 | 2 |
| 184 Male   | 42 | 165 | 81 | 29.75 | 2 | 2 | 3 | 2 | 1 | 1 |
| 185 Female | 67 | 153 | 58 | 24.78 | 1 | 2 | 2 | 1 | 1 | 2 |
| 186 Male   | 73 | 174 | 62 | 20.48 | 2 | 1 | 1 | 2 | 1 | 1 |
| 187 Male   | 61 | 166 | 52 | 18.87 | 2 | 1 | 1 | 2 | 2 | 1 |
| 188 Male   | 65 | 170 | 80 | 27.68 | 1 | 2 | 2 | 1 | 2 | 1 |
| 189 Male   | 71 | 160 | 70 | 27.34 | 2 | 2 | 2 | 1 | 2 | 2 |
| 190 Male   | 46 | 170 | 80 | 27.68 | 1 | 2 | 2 | 1 | 2 | 2 |
| 191 Male   | 61 | 165 | 57 | 20.94 | 1 | 1 | 1 | 1 | 2 | 1 |
| 192 Female | 72 | 152 | 59 | 25.54 | 2 | 1 | 2 | 2 | 2 | 2 |
| 193 Female | 59 | 156 | 63 | 25.89 | 2 | 2 | 2 | 2 | 2 | 2 |
| 194 Male   | 69 | 174 | 81 | 26.75 | 1 | 2 | 2 | 1 | 1 | 1 |
| 195 Male   | 49 | 169 | 70 | 24.51 | 2 | 2 | 2 | 2 | 2 | 1 |
| 196 Male   | 67 | 167 | 62 | 22.23 | 1 | 2 | 1 | 1 | 2 | 2 |
| 197 Male   | 50 | 173 | 80 | 26.73 | 2 | 1 | 2 | 2 | 1 | 1 |
| 198 Male   | 55 | 173 | 75 | 25.06 | 2 | 1 | 2 | 2 | 1 | 1 |
| 199 Male   | 71 | 166 | 67 | 24.31 | 1 | 1 | 2 | 1 | 2 | 2 |

|     |        |    |       |      |       |   |   |   |   |   |   |
|-----|--------|----|-------|------|-------|---|---|---|---|---|---|
| 200 | Male   | 57 | 168   | 65   | 23.03 | 1 | 1 | 1 | 1 | 1 | 1 |
| 201 | Female | 70 | 163   | 60   | 22.58 | 1 | 2 | 1 | 1 | 2 | 2 |
| 202 | Female | 78 | 156   | 57   | 23.42 | 2 | 1 | 1 | 2 | 2 | 2 |
| 203 | Male   | 54 | 176   | 65   | 20.98 | 1 | 2 | 1 | 1 | 2 | 1 |
| 204 | Male   | 72 | 170   | 68   | 23.53 | 2 | 1 | 1 | 2 | 2 | 1 |
| 205 | Female | 74 | 167   | 64.5 | 23.13 | 1 | 2 | 1 | 1 | 1 | 2 |
| 206 | Female | 76 | 155   | 65   | 27.06 | 1 | 1 | 2 | 1 | 2 | 2 |
| 207 | Female | 79 | 160   | 63   | 24.61 | 1 | 2 | 2 | 1 | 2 | 2 |
| 208 | Male   | 53 | 171   | 70   | 23.94 | 1 | 1 | 1 | 1 | 1 | 2 |
| 209 | Female | 47 | 162   | 79   | 30.10 | 1 | 2 | 3 | 1 | 1 | 2 |
| 210 | Male   | 48 | 160   | 80   | 31.25 | 1 | 2 | 3 | 1 | 2 | 1 |
| 211 | Female | 66 | 148   | 45   | 20.54 | 1 | 2 | 1 | 1 | 2 | 1 |
| 212 | Female | 55 | 153.5 | 59   | 25.04 | 2 | 1 | 2 | 2 | 2 | 2 |
| 213 | Male   | 76 | 178   | 84   | 26.51 | 1 | 1 | 2 | 1 | 2 | 1 |
| 214 | Male   | 76 | 170   | 65   | 22.49 | 2 | 2 | 1 | 2 | 1 | 2 |
| 215 | Male   | 56 | 173   | 63   | 21.05 | 2 | 1 | 1 | 2 | 1 | 1 |
| 216 | Female | 62 | 156   | 68.5 | 28.15 | 1 | 1 | 3 | 1 | 1 | 2 |
| 217 | Female | 60 | 170   | 84   | 29.07 | 1 | 2 | 3 | 1 | 2 | 2 |
| 218 | Female | 74 | 149   | 67   | 30.18 | 1 | 2 | 3 | 1 | 2 | 2 |
| 219 | Female | 77 | 153   | 76   | 32.47 | 1 | 2 | 3 | 1 | 1 | 2 |
| 220 | Female | 69 | 157   | 49   | 19.88 | 2 | 1 | 1 | 2 | 2 | 2 |
| 221 | Male   | 66 | 168   | 70   | 24.80 | 1 | 1 | 2 | 1 | 1 | 2 |
| 222 | Male   | 46 | 178   | 79   | 24.93 | 2 | 2 | 2 | 2 | 2 | 1 |
| 223 | Female | 62 | 163   | 60   | 22.58 | 2 | 1 | 1 | 2 | 2 | 2 |
| 224 | Female | 67 | 155   | 66   | 27.47 | 1 | 2 | 2 | 1 | 2 | 2 |
| 225 | Female | 55 | 158   | 51   | 20.43 | 2 | 1 | 1 | 2 | 1 | 2 |
| 226 | Female | 73 | 165   | 76   | 27.92 | 1 | 2 | 2 | 1 | 2 | 2 |
| 227 | Female | 88 | 155   | 50   | 20.81 | 1 | 1 | 1 | 1 | 2 | 2 |
| 228 | Male   | 73 | 177   | 80   | 25.54 | 2 | 2 | 2 | 1 | 2 | 1 |
| 229 | Male   | 80 | 158   | 68.5 | 27.44 | 1 | 2 | 2 | 1 | 2 | 1 |
| 230 | Female | 79 | 157   | 77   | 31.24 | 1 | 2 | 3 | 1 | 2 | 2 |
| 231 | Male   | 84 | 157   | 54.5 | 22.11 | 1 | 2 | 1 | 1 | 2 | 2 |
| 232 | Male   | 75 | 171   | 80   | 27.36 | 2 | 2 | 2 | 2 | 2 | 1 |
| 233 | Male   | 52 | 175   | 80   | 26.12 | 2 | 2 | 2 | 2 | 2 | 1 |
| 234 | Female | 83 | 154   | 50   | 21.08 | 2 | 1 | 1 | 2 | 2 | 2 |
| 235 | Female | 57 | 168   | 100  | 35.43 | 1 | 2 | 3 | 1 | 2 | 2 |
| 236 | Male   | 52 | 165   | 89   | 32.69 | 2 | 2 | 3 | 1 | 2 | 1 |
| 237 | Male   | 59 | 169   | 65   | 22.76 | 2 | 2 | 1 | 2 | 2 | 2 |
| 238 | Male   | 51 | 168   | 67   | 23.74 | 1 | 1 | 1 | 1 | 2 | 1 |
| 239 | Male   | 65 | 171   | 72.5 | 24.79 | 2 | 2 | 2 | 2 | 2 | 1 |

|            |    |       |      |       |   |   |   |   |   |   |
|------------|----|-------|------|-------|---|---|---|---|---|---|
| 240 Female | 73 | 158   | 53.6 | 21.47 | 1 | 1 | 1 | 1 | 1 | 2 |
| 241 Female | 62 | 160   | 72   | 28.13 | 1 | 2 | 3 | 1 | 2 | 2 |
| 242 Male   | 69 | 160   | 62   | 24.22 | 1 | 1 | 2 | 1 | 2 | 2 |
| 243 Male   | 72 | 165   | 59   | 21.67 | 1 | 2 | 1 | 1 | 1 | 1 |
| 244 Male   | 62 | 160   | 72   | 28.13 | 1 | 2 | 3 | 1 | 2 | 1 |
| 245 Female | 68 | 158   | 78   | 31.24 | 1 | 1 | 3 | 1 | 1 | 2 |
| 246 Male   | 55 | 168   | 78   | 27.64 | 2 | 2 | 2 | 1 | 1 | 1 |
| 247 Male   | 66 | 169   | 69   | 24.16 | 2 | 1 | 2 | 2 | 2 | 1 |
| 248 Female | 69 | 168   | 68   | 24.09 | 1 | 1 | 2 | 1 | 2 | 2 |
| 249 Male   | 55 | 172   | 76   | 25.69 | 1 | 2 | 2 | 1 | 1 | 1 |
| 250 Male   | 52 | 166   | 60   | 21.77 | 1 | 2 | 1 | 1 | 1 | 2 |
| 251 Female | 61 | 162   | 71   | 27.05 | 2 | 2 | 2 | 2 | 1 | 2 |
| 252 Male   | 51 | 170   | 73   | 25.26 | 2 | 2 | 2 | 2 | 1 | 1 |
| 253 Male   | 60 | 169   | 78   | 27.31 | 1 | 1 | 2 | 1 | 1 | 1 |
| 254 Male   | 55 | 175   | 101  | 32.98 | 1 | 2 | 3 | 1 | 2 | 1 |
| 255 Male   | 49 | 169   | 75   | 26.26 | 1 | 1 | 2 | 1 | 2 | 1 |
| 256 Female | 71 | 168   | 66   | 23.38 | 1 | 2 | 1 | 1 | 1 | 2 |
| 257 Female | 58 | 165   | 75   | 27.55 | 2 | 2 | 2 | 2 | 2 | 2 |
| 258 Male   | 78 | 170   | 73   | 25.26 | 2 | 2 | 2 | 2 | 1 | 2 |
| 259 Male   | 74 | 175   | 67   | 21.88 | 2 | 1 | 1 | 2 | 2 | 2 |
| 260 Male   | 50 | 170   | 72   | 24.91 | 2 | 2 | 2 | 2 | 2 | 2 |
| 261 Female | 61 | 154   | 62   | 26.14 | 1 | 2 | 2 | 1 | 2 | 2 |
| 262 Female | 49 | 157   | 73   | 29.62 | 1 | 1 | 3 | 1 | 1 | 2 |
| 263 Female | 45 | 165   | 70   | 25.71 | 2 | 1 | 2 | 1 | 2 | 2 |
| 264 Male   | 67 | 158   | 54   | 21.63 | 2 | 1 | 1 | 2 | 2 | 2 |
| 265 Male   | 59 | 172   | 86   | 29.07 | 2 | 2 | 3 | 1 | 2 | 1 |
| 266 Female | 77 | 155   | 68   | 28.30 | 1 | 2 | 3 | 1 | 2 | 1 |
| 267 Male   | 57 | 174   | 86   | 28.41 | 2 | 1 | 3 | 2 | 1 | 1 |
| 268 Male   | 68 | 168   | 70   | 24.80 | 1 | 2 | 2 | 1 | 2 | 1 |
| 269 Male   | 42 | 172   | 91   | 30.76 | 1 | 1 | 3 | 1 | 2 | 1 |
| 270 Male   | 48 | 170   | 95   | 32.87 | 1 | 1 | 3 | 1 | 2 | 2 |
| 271 Female | 69 | 153   | 55   | 23.50 | 2 | 1 | 1 | 2 | 2 | 2 |
| 272 Female | 45 | 155   | 75   | 31.22 | 1 | 2 | 3 | 1 | 2 | 2 |
| 273 Female | 61 | 149.5 | 44   | 19.69 | 1 | 2 | 1 | 1 | 2 | 2 |
| 274 Male   | 41 | 180   | 85   | 26.23 | 2 | 2 | 2 | 1 | 1 | 1 |
| 275 Female | 62 | 160   | 60   | 23.44 | 2 | 2 | 1 | 1 | 2 | 2 |
| 276 Female | 74 | 155   | 50   | 20.81 | 1 | 2 | 1 | 1 | 1 | 2 |
| 277 Male   | 55 | 174   | 69   | 22.79 | 1 | 1 | 1 | 1 | 2 | 2 |
| 278 Male   | 64 | 179   | 79   | 24.66 | 1 | 1 | 2 | 1 | 2 | 2 |
| 279 Male   | 50 | 170   | 83   | 28.72 | 1 | 1 | 3 | 1 | 2 | 1 |

|     |        |    |     |      |       |   |   |   |   |   |   |
|-----|--------|----|-----|------|-------|---|---|---|---|---|---|
| 280 | Male   | 67 | 176 | 78   | 25.18 | 1 | 1 | 2 | 1 | 2 | 2 |
| 281 | Male   | 53 | 175 | 75   | 24.49 | 1 | 1 | 2 | 1 | 2 | 1 |
| 282 | Male   | 76 | 165 | 66   | 24.24 | 1 | 1 | 2 | 1 | 2 | 2 |
| 283 | Male   | 51 | 178 | 92   | 29.04 | 1 | 1 | 3 | 1 | 1 | 1 |
| 284 | Male   | 60 | 167 | 73.6 | 26.39 | 2 | 1 | 2 | 2 | 2 | 1 |
| 285 | Female | 56 | 159 | 58   | 22.94 | 1 | 1 | 1 | 1 | 2 | 2 |
| 286 | Male   | 60 | 170 | 87   | 30.10 | 1 | 1 | 3 | 1 | 1 | 1 |
| 287 | Female | 81 | 160 | 48   | 18.75 | 1 | 2 | 1 | 1 | 2 | 1 |
| 288 | Male   | 81 | 170 | 86   | 29.76 | 2 | 2 | 3 | 2 | 2 | 1 |
| 289 | Male   | 55 | 170 | 95   | 32.87 | 1 | 1 | 3 | 1 | 2 | 1 |
| 290 | Male   | 66 | 170 | 83   | 28.72 | 1 | 1 | 3 | 1 | 2 | 1 |
| 291 | Female | 67 | 168 | 75   | 26.57 | 1 | 1 | 2 | 1 | 1 | 1 |
| 292 | Male   | 64 | 160 | 82.5 | 32.23 | 1 | 1 | 3 | 1 | 1 | 1 |
| 293 | Male   | 60 | 171 | 70   | 23.94 | 2 | 1 | 1 | 2 | 2 | 1 |
| 294 | Female | 75 | 158 | 68   | 27.24 | 1 | 1 | 2 | 1 | 2 | 2 |
| 295 | Male   | 68 | 166 | 65   | 23.59 | 1 | 1 | 1 | 1 | 2 | 1 |
| 296 | Male   | 43 | 173 | 82   | 27.40 | 1 | 1 | 2 | 1 | 2 | 1 |
| 297 | Male   | 60 | 170 | 65   | 22.49 | 1 | 1 | 1 | 1 | 1 | 1 |
| 298 | Male   | 54 | 168 | 72   | 25.51 | 1 | 1 | 2 | 1 | 2 | 1 |
| 299 | Male   | 62 | 178 | 75   | 23.67 | 2 | 2 | 1 | 1 | 2 | 2 |
| 300 | Male   | 69 | 170 | 75   | 25.95 | 2 | 2 | 2 | 2 | 2 | 1 |
| 301 | Male   | 56 | 182 | 98   | 29.59 | 1 | 2 | 3 | 1 | 2 | 2 |
| 302 | Male   | 82 | 172 | 58   | 19.61 | 1 | 2 | 1 | 1 | 2 | 1 |
| 303 | Female | 66 | 160 | 70   | 27.34 | 1 | 1 | 2 | 1 | 1 | 2 |
| 304 | Female | 63 | 158 | 56   | 22.43 | 1 | 1 | 1 | 1 | 2 | 2 |
| 305 | Female | 54 | 164 | 70   | 26.03 | 2 | 2 | 2 | 2 | 1 | 2 |
| 306 | Male   | 59 | 158 | 57   | 22.83 | 1 | 2 | 1 | 1 | 2 | 1 |
| 307 | Male   | 55 | 164 | 70   | 26.03 | 1 | 1 | 2 | 1 | 2 | 2 |
| 308 | Male   | 71 | 170 | 54   | 18.69 | 1 | 1 | 1 | 1 | 2 | 1 |
| 309 | Male   | 63 | 170 | 78   | 26.99 | 2 | 2 | 2 | 1 | 2 | 1 |
| 310 | Female | 59 | 160 | 47.5 | 18.55 | 1 | 2 | 1 | 1 | 2 | 2 |
| 311 | Male   | 53 | 176 | 90   | 29.05 | 2 | 2 | 3 | 2 | 1 | 1 |
| 312 | Female | 66 | 162 | 81   | 30.86 | 1 | 1 | 3 | 1 | 2 | 2 |
| 313 | Female | 63 | 160 | 79   | 30.86 | 1 | 1 | 3 | 1 | 1 | 2 |
| 314 | Male   | 63 | 170 | 80   | 27.68 | 2 | 1 | 2 | 1 | 1 | 1 |
| 315 | Female | 69 | 157 | 70   | 28.40 | 1 | 1 | 3 | 1 | 2 | 2 |
| 316 | Female | 70 | 150 | 40   | 17.78 | 2 | 2 | 1 | 2 | 1 | 2 |
| 317 | Male   | 64 | 167 | 68   | 24.38 | 2 | 1 | 2 | 2 | 1 | 1 |
| 318 | Female | 60 | 158 | 60   | 24.03 | 1 | 1 | 2 | 1 | 1 | 2 |
| 319 | Female | 77 | 150 | 50.5 | 22.44 | 1 | 1 | 1 | 1 | 2 | 2 |



|            |    |       |      |       |   |   |   |   |   |   |
|------------|----|-------|------|-------|---|---|---|---|---|---|
| 320 Male   | 53 | 171   | 86   | 29.41 | 1 | 2 | 3 | 1 | 2 | 1 |
| 321 Male   | 65 | 182   | 102  | 30.79 | 2 | 2 | 3 | 2 | 2 | 1 |
| 322 Female | 61 | 162   | 76   | 28.96 | 2 | 2 | 3 | 1 | 2 | 2 |
| 323 Male   | 55 | 167   | 89   | 31.91 | 1 | 1 | 3 | 1 | 1 | 1 |
| 324 Male   | 54 | 178   | 81   | 25.56 | 2 | 2 | 2 | 2 | 2 | 2 |
| 325 Female | 62 | 163   | 56   | 21.08 | 2 | 1 | 1 | 2 | 2 | 2 |
| 326 Female | 69 | 162   | 57   | 21.72 | 2 | 1 | 1 | 1 | 2 | 2 |
| 327 Female | 72 | 169   | 71   | 24.86 | 1 | 1 | 2 | 1 | 1 | 2 |
| 328 Female | 67 | 151.5 | 68.1 | 29.67 | 1 | 1 | 3 | 1 | 1 | 2 |
| 329 Male   | 49 | 174   | 74.5 | 24.61 | 2 | 2 | 2 | 1 | 2 | 1 |
| 330 Male   | 40 | 182   | 114  | 34.42 | 2 | 2 | 3 | 2 | 2 | 1 |
| 331 Female | 62 | 152   | 70   | 30.30 | 1 | 1 | 3 | 1 | 2 | 2 |
| 332 Male   | 52 | 172   | 68   | 22.99 | 1 | 2 | 1 | 1 | 2 | 1 |
| 333 Female | 55 | 160   | 65   | 25.39 | 2 | 2 | 2 | 2 | 1 | 2 |
| 334 Female | 72 | 147   | 52.5 | 24.30 | 1 | 1 | 2 | 1 | 2 | 2 |
| 335 Female | 72 | 159   | 68.7 | 27.17 | 1 | 1 | 2 | 1 | 1 | 2 |
| 336 Female | 55 | 158   | 89   | 35.65 | 1 | 2 | 3 | 1 | 2 | 2 |
| 337 Female | 62 | 155   | 71   | 29.55 | 2 | 1 | 3 | 1 | 1 | 2 |
| 338 Male   | 80 | 167   | 70   | 25.10 | 2 | 2 | 2 | 2 | 2 | 1 |
| 339 Female | 65 | 158   | 64   | 25.64 | 2 | 2 | 2 | 2 | 1 | 2 |
| 340 Male   | 50 | 168   | 85   | 30.12 | 2 | 1 | 3 | 1 | 1 | 1 |
| 341 Female | 51 | 163   | 75   | 28.23 | 1 | 2 | 3 | 1 | 2 | 2 |
| 342 Male   | 66 | 172   | 72   | 24.34 | 2 | 1 | 2 | 2 | 1 | 1 |
| 343 Male   | 72 | 175   | 80   | 26.12 | 1 | 2 | 2 | 1 | 2 | 1 |
| 344 Male   | 72 | 167   | 90   | 32.27 | 2 | 1 | 3 | 2 | 2 | 1 |
| 345 Female | 67 | 165   | 72   | 26.45 | 1 | 2 | 2 | 1 | 1 | 2 |
| 346 Male   | 62 | 170   | 79   | 27.34 | 1 | 2 | 2 | 1 | 2 | 1 |
| 347 Female | 73 | 164   | 66   | 24.54 | 1 | 1 | 2 | 1 | 2 | 2 |
| 348 Male   | 73 | 167   | 67.5 | 24.20 | 2 | 2 | 2 | 1 | 2 | 1 |
| 349 Male   | 71 | 170   | 75   | 25.95 | 1 | 1 | 2 | 1 | 2 | 1 |
| 350 Male   | 61 | 170   | 76   | 26.30 | 1 | 2 | 2 | 1 | 2 | 2 |
| 351 Male   | 49 | 173   | 95   | 31.74 | 2 | 1 | 3 | 1 | 2 | 2 |
| 352 Male   | 57 | 178   | 86   | 27.14 | 1 | 1 | 2 | 1 | 1 | 1 |
| 353 Female | 63 | 163   | 71   | 26.72 | 1 | 1 | 2 | 1 | 1 | 2 |
| 354 Female | 79 | 160   | 60   | 23.44 | 1 | 1 | 1 | 1 | 1 | 1 |
| 355 Male   | 61 | 171.5 | 89.3 | 30.36 | 2 | 1 | 3 | 2 | 2 | 1 |
| 356 Male   | 51 | 178   | 103  | 32.51 | 1 | 1 | 3 | 1 | 1 | 1 |
| 357 Male   | 51 | 174   | 87   | 28.74 | 1 | 1 | 3 | 1 | 1 | 1 |
| 358 Male   | 55 | 174   | 75   | 24.77 | 2 | 1 | 2 | 1 | 1 | 1 |
| 359 Female | 72 | 160   | 60   | 23.44 | 1 | 1 | 1 | 1 | 2 | 2 |

|            |    |       |      |       |   |   |   |   |   |   |
|------------|----|-------|------|-------|---|---|---|---|---|---|
| 360 Female | 75 | 166   | 76   | 27.58 | 1 | 1 | 2 | 1 | 1 | 2 |
| 361 Male   | 58 | 162   | 58   | 22.10 | 1 | 2 | 1 | 1 | 1 | 1 |
| 362 Male   | 52 | 168   | 75   | 26.57 | 2 | 2 | 2 | 1 | 2 | 1 |
| 363 Male   | 63 | 168   | 80   | 28.34 | 1 | 1 | 3 | 1 | 2 | 1 |
| 364 Female | 60 | 158   | 72   | 28.84 | 1 | 1 | 3 | 1 | 1 | 2 |
| 365 Male   | 69 | 168.1 | 68.1 | 24.10 | 2 | 2 | 2 | 1 | 2 | 1 |
| 366 Male   | 61 | 167   | 63.9 | 22.91 | 1 | 1 | 1 | 1 | 2 | 1 |
| 367 Female | 64 | 164   | 70   | 26.03 | 1 | 2 | 2 | 1 | 2 | 2 |
| 368 Male   | 60 | 162   | 71   | 27.05 | 1 | 1 | 2 | 1 | 1 | 2 |
| 369 Female | 76 | 155   | 70   | 29.14 | 1 | 1 | 3 | 1 | 1 | 2 |
| 370 Female | 61 | 162   | 66   | 25.15 | 1 | 2 | 2 | 1 | 2 | 2 |
| 371 Male   | 80 | 163   | 70   | 26.35 | 1 | 2 | 2 | 1 | 2 | 2 |
| 372 Female | 74 | 153   | 54   | 23.07 | 2 | 2 | 1 | 1 | 1 | 2 |
| 373 Male   | 56 | 173   | 63   | 21.05 | 1 | 2 | 1 | 1 | 1 | 2 |
| 374 Female | 64 | 159   | 56   | 22.15 | 2 | 1 | 1 | 1 | 1 | 2 |
| 375 Male   | 48 | 175   | 94   | 30.69 | 1 | 2 | 3 | 1 | 2 | 1 |
| 376 Male   | 63 | 163   | 89   | 33.50 | 1 | 1 | 3 | 1 | 1 | 1 |
| 377 Male   | 64 | 173   | 65   | 21.72 | 1 | 1 | 1 | 1 | 2 | 1 |
| 378 Male   | 72 | 180   | 94   | 29.01 | 1 | 1 | 3 | 1 | 2 | 1 |
| 379 Female | 69 | 156   | 57   | 23.42 | 1 | 1 | 1 | 1 | 2 | 2 |
| 380 Male   | 51 | 170   | 70   | 24.22 | 1 | 2 | 2 | 1 | 2 | 1 |
| 381 Female | 80 | 158   | 55   | 22.03 | 1 | 1 | 1 | 1 | 2 | 2 |
| 382 Male   | 56 | 165   | 86   | 31.59 | 2 | 1 | 3 | 2 | 2 | 2 |
| 383 Male   | 60 | 172   | 83   | 28.06 | 1 | 1 | 3 | 1 | 2 | 1 |
| 384 Male   | 78 | 169   | 74   | 25.91 | 1 | 1 | 2 | 1 | 1 | 1 |
| 385 Female | 57 | 157   | 66   | 26.78 | 1 | 2 | 2 | 1 | 2 | 2 |
| 386 Female | 61 | 151   | 54   | 23.68 | 2 | 1 | 1 | 2 | 1 | 2 |
| 387 Male   | 63 | 178   | 75   | 23.67 | 1 | 2 | 1 | 1 | 2 | 2 |
| 388 Male   | 62 | 169   | 77.4 | 27.10 | 2 | 1 | 2 | 1 | 1 | 1 |
| 389 Female | 64 | 162   | 65   | 24.77 | 1 | 1 | 2 | 1 | 2 | 2 |
| 390 Male   | 66 | 177   | 92   | 29.37 | 2 | 2 | 3 | 2 | 1 | 2 |
| 391 Male   | 57 | 173   | 60   | 20.05 | 2 | 1 | 1 | 1 | 2 | 1 |
| 392 Male   | 56 | 172   | 73   | 24.68 | 2 | 1 | 2 | 2 | 1 | 1 |
| 393 Male   | 45 | 172   | 66   | 22.31 | 1 | 1 | 1 | 1 | 2 | 1 |
| 394 Male   | 69 | 180   | 87   | 26.85 | 2 | 1 | 2 | 1 | 2 | 2 |
| 395 Female | 59 | 158   | 60   | 24.03 | 1 | 1 | 2 | 1 | 2 | 2 |
| 396 Male   | 70 | 168   | 69   | 24.45 | 1 | 2 | 2 | 1 | 1 | 1 |
| 397 Male   | 53 | 176   | 87   | 28.09 | 2 | 2 | 3 | 2 | 2 | 1 |
| 398 Male   | 60 | 173   | 74.5 | 24.89 | 1 | 1 | 2 | 1 | 2 | 2 |
| 399 Male   | 58 | 165   | 79   | 29.02 | 1 | 1 | 3 | 1 | 1 | 1 |

|            |    |     |      |       |   |   |   |   |   |   |
|------------|----|-----|------|-------|---|---|---|---|---|---|
| 400 Male   | 51 | 166 | 68   | 24.68 | 1 | 1 | 2 | 1 | 2 | 1 |
| 401 Female | 76 | 151 | 58   | 25.44 | 1 | 1 | 2 | 1 | 2 | 2 |
| 402 Female | 60 | 158 | 51.5 | 20.63 | 2 | 1 | 1 | 1 | 2 | 2 |
| 403 Female | 64 | 160 | 55   | 21.48 | 2 | 2 | 1 | 2 | 2 | 2 |
| 404 Female | 80 | 160 | 59   | 23.05 | 1 | 1 | 1 | 1 | 2 | 2 |
| 405 Female | 57 | 165 | 87   | 31.96 | 1 | 1 | 3 | 1 | 1 | 2 |
| 406 Male   | 60 | 175 | 82   | 26.78 | 1 | 2 | 2 | 1 | 1 | 1 |
| 407 Male   | 76 | 170 | 86   | 29.76 | 2 | 2 | 3 | 1 | 2 | 2 |
| 408 Male   | 61 | 171 | 51   | 17.44 | 2 | 2 | 1 | 2 | 2 | 1 |
| 409 Male   | 80 | 165 | 83   | 30.49 | 2 | 1 | 3 | 2 | 1 | 1 |
| 410 Male   | 50 | 175 | 74   | 24.16 | 2 | 1 | 2 | 2 | 2 | 1 |
| 411 Male   | 71 | 164 | 57   | 21.19 | 1 | 1 | 1 | 1 | 1 | 2 |
| 412 Male   | 57 | 172 | 90   | 30.42 | 2 | 1 | 3 | 2 | 2 | 1 |
| 413 Male   | 54 | 168 | 89   | 31.53 | 2 | 2 | 3 | 2 | 2 | 1 |
| 414 Female | 79 | 150 | 63   | 28.00 | 1 | 1 | 3 | 1 | 1 | 2 |
| 415 Female | 66 | 155 | 59   | 24.56 | 2 | 1 | 2 | 2 | 2 | 1 |
| 416 Male   | 50 | 168 | 80   | 28.34 | 1 | 1 | 3 | 1 | 2 | 1 |
| 417 Male   | 72 | 172 | 82   | 27.72 | 1 | 2 | 2 | 1 | 1 | 1 |
| 418 Male   | 66 | 179 | 90   | 28.09 | 1 | 1 | 3 | 1 | 2 | 2 |
| 419 Male   | 65 | 170 | 71   | 24.57 | 2 | 1 | 2 | 2 | 2 | 1 |
| 420 Male   | 75 | 166 | 71   | 25.77 | 1 | 2 | 2 | 1 | 2 | 2 |
| 421 Female | 51 | 160 | 75   | 29.30 | 1 | 1 | 3 | 1 | 1 | 2 |
| 422 Female | 62 | 161 | 89   | 34.34 | 1 | 2 | 3 | 1 | 1 | 2 |
| 423 Male   | 66 | 184 | 87   | 25.70 | 1 | 1 | 2 | 1 | 2 | 1 |
| 424 Female | 60 | 158 | 89   | 35.65 | 1 | 1 | 3 | 1 | 2 | 2 |
| 425 Male   | 63 | 170 | 67   | 23.18 | 1 | 2 | 1 | 1 | 2 | 1 |
| 426 Female | 53 | 162 | 72   | 27.43 | 1 | 1 | 2 | 1 | 1 | 1 |
| 427 Male   | 49 | 168 | 78   | 27.64 | 1 | 1 | 2 | 1 | 1 | 1 |
| 428 Male   | 74 | 167 | 78   | 27.97 | 1 | 1 | 2 | 1 | 2 | 2 |
| 429 Male   | 59 | 170 | 75   | 25.95 | 2 | 2 | 2 | 2 | 2 | 1 |
| 430 Male   | 68 | 170 | 84   | 29.07 | 1 | 1 | 3 | 1 | 1 | 1 |
| 431 Female | 57 | 153 | 62   | 26.49 | 1 | 1 | 2 | 1 | 1 | 2 |
| 432 Male   | 71 | 170 | 63   | 21.80 | 1 | 1 | 1 | 1 | 1 | 1 |
| 433 Male   | 85 | 168 | 75   | 26.57 | 2 | 2 | 2 | 2 | 2 | 1 |
| 434 Male   | 61 | 175 | 84.5 | 27.59 | 1 | 1 | 2 | 1 | 1 | 1 |
| 435 Male   | 46 | 169 | 68   | 23.81 | 2 | 2 | 1 | 2 | 2 | 1 |
| 436 Male   | 74 | 174 | 85   | 28.08 | 1 | 2 | 3 | 1 | 1 | 1 |
| 437 Male   | 55 | 178 | 74   | 23.36 | 1 | 2 | 1 | 1 | 2 | 1 |
| 438 Male   | 52 | 174 | 85   | 28.08 | 1 | 1 | 3 | 1 | 1 | 1 |
| 439 Male   | 63 | 179 | 86   | 26.84 | 1 | 1 | 2 | 1 | 1 | 1 |

|     |        |    |     |      |       |   |   |   |   |   |   |
|-----|--------|----|-----|------|-------|---|---|---|---|---|---|
| 440 | Male   | 78 | 172 | 68   | 22.99 | 1 | 1 | 1 | 1 | 1 | 1 |
| 441 | Male   | 63 | 165 | 70   | 25.71 | 2 | 2 | 2 | 2 | 1 | 1 |
| 442 | Male   | 71 | 170 | 85   | 29.41 | 1 | 1 | 3 | 1 | 2 | 1 |
| 443 | Female | 70 | 160 | 69   | 26.95 | 1 | 1 | 2 | 1 | 2 | 2 |
| 444 | Female | 85 | 150 | 51.5 | 22.89 | 1 | 1 | 1 | 1 | 2 | 2 |
| 445 | Male   | 77 | 160 | 67   | 26.17 | 1 | 1 | 2 | 1 | 1 | 1 |
| 446 | Female | 74 | 160 | 58   | 22.66 | 1 | 1 | 1 | 1 | 1 | 2 |
| 447 | Female | 48 | 155 | 72   | 29.97 | 2 | 2 | 3 | 2 | 2 | 2 |
| 448 | Female | 74 | 154 | 63   | 26.56 | 2 | 2 | 2 | 2 | 1 | 2 |
| 449 | Male   | 71 | 170 | 62   | 21.45 | 1 | 1 | 1 | 1 | 1 | 2 |
| 450 | Male   | 50 | 165 | 80   | 29.38 | 1 | 1 | 3 | 1 | 1 | 1 |
| 451 | Female | 65 | 166 | 55   | 19.96 | 1 | 1 | 1 | 1 | 2 | 2 |
| 452 | Male   | 48 | 166 | 70   | 25.40 | 2 | 1 | 2 | 1 | 2 | 1 |
| 453 | Male   | 58 | 174 | 95   | 31.38 | 1 | 1 | 3 | 1 | 2 | 1 |
| 454 | Male   | 79 | 180 | 80   | 24.69 | 1 | 1 | 2 | 1 | 2 | 1 |
| 455 | Male   | 62 | 184 | 91.5 | 27.03 | 1 | 1 | 2 | 1 | 2 | 1 |
| 456 | Female | 60 | 158 | 59   | 23.63 | 1 | 2 | 1 | 1 | 1 | 2 |
| 457 | Male   | 64 | 170 | 85.5 | 29.58 | 1 | 1 | 3 | 1 | 2 | 1 |
| 458 | Female | 48 | 150 | 65   | 28.89 | 1 | 1 | 3 | 1 | 2 | 2 |
| 459 | Male   | 56 | 171 | 80   | 27.36 | 1 | 1 | 2 | 1 | 2 | 1 |
| 460 | Male   | 61 | 176 | 83   | 26.79 | 2 | 1 | 2 | 2 | 2 | 1 |
| 461 | Male   | 76 | 170 | 80   | 27.68 | 2 | 2 | 2 | 2 | 2 | 1 |
| 462 | Female | 67 | 156 | 75   | 30.82 | 1 | 1 | 3 | 1 | 2 | 2 |
| 463 | Male   | 59 | 170 | 80   | 27.68 | 2 | 1 | 2 | 2 | 2 | 2 |
| 464 | Male   | 50 | 170 | 75   | 25.95 | 2 | 2 | 2 | 2 | 2 | 1 |
| 465 | Male   | 75 | 160 | 75   | 29.30 | 1 | 1 | 3 | 1 | 1 | 2 |
| 466 | Male   | 63 | 168 | 68   | 24.09 | 1 | 2 | 2 | 1 | 2 | 1 |
| 467 | Male   | 58 | 173 | 84   | 28.07 | 1 | 2 | 3 | 1 | 1 | 1 |
| 468 | Female | 63 | 153 | 56   | 23.92 | 1 | 1 | 1 | 1 | 1 | 2 |
| 469 | Male   | 70 | 167 | 55   | 19.72 | 1 | 2 | 1 | 1 | 2 | 2 |
| 470 | Male   | 76 | 165 | 72   | 26.45 | 1 | 2 | 2 | 1 | 2 | 1 |
| 471 | Female | 61 | 160 | 55   | 21.48 | 2 | 1 | 1 | 2 | 1 | 2 |
| 472 | Male   | 53 | 176 | 98   | 31.64 | 2 | 1 | 3 | 1 | 1 | 1 |
| 473 | Male   | 63 | 183 | 98   | 29.26 | 1 | 1 | 3 | 1 | 1 | 1 |
| 474 | Male   | 59 | 180 | 84   | 25.93 | 2 | 2 | 2 | 1 | 2 | 1 |
| 475 | Female | 62 | 164 | 63   | 23.42 | 2 | 1 | 1 | 2 | 2 | 2 |
| 476 | Male   | 58 | 175 | 74   | 24.16 | 2 | 2 | 2 | 2 | 2 | 1 |
| 477 | Female | 53 | 164 | 75   | 27.89 | 1 | 2 | 2 | 1 | 2 | 2 |
| 478 | Female | 73 | 150 | 70   | 31.11 | 1 | 2 | 3 | 1 | 2 | 2 |
| 479 | Male   | 39 | 165 | 91   | 33.43 | 2 | 1 | 3 | 1 | 1 | 1 |

|            |    |     |      |       |   |   |   |   |   |   |
|------------|----|-----|------|-------|---|---|---|---|---|---|
| 480 Male   | 47 | 176 | 95   | 30.67 | 1 | 1 | 3 | 1 | 1 | 1 |
| 481 Female | 61 | 163 | 75   | 28.23 | 1 | 2 | 3 | 1 | 1 | 2 |
| 482 Female | 55 | 155 | 70   | 29.14 | 1 | 1 | 3 | 1 | 2 | 2 |
| 483 Female | 61 | 163 | 77   | 28.98 | 1 | 1 | 3 | 1 | 1 | 2 |
| 484 Male   | 66 | 170 | 61.5 | 21.28 | 2 | 1 | 1 | 2 | 2 | 1 |
| 485 Female | 64 | 150 | 52   | 23.11 | 2 | 1 | 1 | 1 | 1 | 2 |
| 486 Male   | 45 | 180 | 72   | 22.22 | 2 | 1 | 1 | 1 | 2 | 1 |
| 487 Female | 60 | 158 | 52   | 20.83 | 2 | 2 | 1 | 2 | 2 | 2 |
| 488 Female | 56 | 163 | 54   | 20.32 | 2 | 2 | 1 | 2 | 2 | 2 |
| 489 Male   | 45 | 173 | 126  | 42.10 | 1 | 2 | 3 | 1 | 2 | 2 |
| 490 Female | 52 | 162 | 75   | 28.58 | 1 | 2 | 3 | 1 | 2 | 2 |
| 491 Male   | 55 | 174 | 78   | 25.76 | 1 | 2 | 2 | 1 | 2 | 1 |
| 492 Male   | 55 | 178 | 95   | 29.98 | 2 | 2 | 3 | 2 | 2 | 1 |
| 493 Male   | 61 | 166 | 73   | 26.49 | 1 | 1 | 2 | 1 | 1 | 1 |
| 494 Female | 70 | 152 | 62   | 26.84 | 2 | 2 | 2 | 2 | 2 | 2 |
| 495 Female | 64 | 155 | 74   | 30.80 | 1 | 2 | 3 | 1 | 1 | 2 |
| 496 Male   | 60 | 172 | 100  | 33.80 | 2 | 2 | 3 | 2 | 1 | 1 |
| 497 Female | 56 | 165 | 65   | 23.88 | 1 | 1 | 1 | 1 | 2 | 2 |
| 498 Male   | 62 | 173 | 65   | 21.72 | 1 | 1 | 1 | 1 | 2 | 1 |
| 499 Female | 51 | 158 | 86   | 34.45 | 1 | 2 | 3 | 1 | 2 | 2 |
| 500 Male   | 58 | 179 | 98   | 30.59 | 1 | 2 | 3 | 1 | 1 | 2 |
| 501 Female | 73 | 169 | 67.5 | 23.63 | 1 | 1 | 1 | 1 | 1 | 2 |
| 502 Male   | 48 | 176 | 78   | 25.18 | 2 | 2 | 2 | 2 | 2 | 1 |
| 503 Female | 56 | 155 | 58.5 | 24.35 | 2 | 2 | 2 | 2 | 2 | 2 |
| 504 Male   | 59 | 165 | 63   | 23.14 | 2 | 2 | 1 | 2 | 2 | 2 |
| 505 Male   | 55 | 174 | 74   | 24.44 | 2 | 2 | 2 | 2 | 1 | 1 |
| 506 Male   | 66 | 174 | 80   | 26.42 | 2 | 2 | 2 | 2 | 2 | 1 |
| 507 Female | 65 | 162 | 56.5 | 21.53 | 1 | 2 | 1 | 1 | 1 | 1 |
| 508 Female | 49 | 164 | 91   | 33.83 | 2 | 2 | 3 | 2 | 2 | 2 |
| 509 Female | 73 | 153 | 76   | 32.47 | 1 | 2 | 3 | 1 | 2 | 2 |
| 510 Male   | 43 | 172 | 76   | 25.69 | 2 | 2 | 2 | 2 | 2 | 1 |
| 511 Female | 72 | 156 | 56   | 23.01 | 1 | 2 | 1 | 1 | 1 | 2 |
| 512 Male   | 50 | 172 | 77   | 26.03 | 2 | 2 | 2 | 2 | 2 | 2 |
| 513 Female | 59 | 156 | 67   | 27.53 | 1 | 2 | 2 | 1 | 1 | 2 |
| 514 Female | 67 | 156 | 68   | 27.94 | 1 | 2 | 2 | 1 | 2 | 2 |
| 515 Female | 60 | 159 | 70   | 27.69 | 2 | 2 | 2 | 2 | 2 | 2 |
| 516 Male   | 54 | 181 | 85   | 25.95 | 1 | 1 | 2 | 1 | 2 | 2 |
| 517 Male   | 43 | 179 | 100  | 31.21 | 2 | 2 | 3 | 1 | 2 | 1 |
| 518 Female | 67 | 160 | 67   | 26.17 | 1 | 2 | 2 | 1 | 2 | 2 |
| 519 Female | 76 | 150 | 56   | 24.89 | 1 | 2 | 2 | 1 | 2 | 2 |

|            |    |     |      |       |   |   |   |   |   |   |
|------------|----|-----|------|-------|---|---|---|---|---|---|
| 520 Female | 69 | 165 | 79.5 | 29.20 | 1 | 2 | 3 | 1 | 1 | 2 |
| 521 Female | 62 | 160 | 61.5 | 24.02 | 1 | 2 | 2 | 1 | 2 | 1 |
| 522 Male   | 51 | 176 | 91.5 | 29.54 | 1 | 1 | 3 | 1 | 1 | 2 |
| 523 Male   | 52 | 178 | 78   | 24.62 | 1 | 2 | 2 | 1 | 2 | 1 |
| 524 Male   | 76 | 168 | 80   | 28.34 | 2 | 2 | 3 | 1 | 2 | 1 |
| 525 Female | 63 | 164 | 70   | 26.03 | 2 | 1 | 2 | 2 | 2 | 2 |
| 526 Female | 64 | 162 | 64   | 24.39 | 2 | 2 | 2 | 2 | 2 | 2 |
| 527 Female | 64 | 160 | 62   | 24.22 | 1 | 2 | 2 | 1 | 2 | 2 |
| 528 Male   | 79 | 180 | 76   | 23.46 | 1 | 2 | 1 | 1 | 2 | 2 |
| 529 Male   | 62 | 170 | 87   | 30.10 | 2 | 2 | 3 | 1 | 2 | 1 |
| 530 Male   | 74 | 175 | 80   | 26.12 | 2 | 1 | 2 | 2 | 2 | 2 |
| 531 Male   | 55 | 180 | 96   | 29.63 | 2 | 2 | 3 | 2 | 2 | 1 |
| 532 Male   | 68 | 169 | 78.5 | 27.49 | 1 | 1 | 2 | 1 | 2 | 1 |
| 533 Female | 75 | 150 | 63   | 28.00 | 1 | 2 | 3 | 1 | 1 | 2 |
| 534 Male   | 84 | 175 | 70   | 22.86 | 1 | 2 | 1 | 1 | 2 | 2 |
| 535 Female | 60 | 166 | 70   | 25.40 | 1 | 1 | 2 | 1 | 2 | 2 |
| 536 Male   | 76 | 176 | 91.5 | 29.54 | 1 | 1 | 3 | 1 | 1 | 2 |
| 537 Male   | 66 | 170 | 81   | 28.03 | 1 | 1 | 3 | 1 | 2 | 1 |
| 538 Female | 65 | 166 | 74.5 | 27.04 | 1 | 1 | 2 | 1 | 1 | 2 |
| 539 Female | 56 | 169 | 69   | 24.16 | 1 | 1 | 2 | 1 | 2 | 2 |
| 540 Male   | 59 | 170 | 74   | 25.61 | 1 | 1 | 2 | 1 | 2 | 1 |
| 541 Female | 78 | 156 | 59   | 24.24 | 1 | 2 | 2 | 1 | 2 | 2 |
| 542 Female | 69 | 164 | 75   | 27.89 | 1 | 2 | 2 | 1 | 2 | 2 |
| 543 Female | 81 | 152 | 82.5 | 35.71 | 1 | 2 | 3 | 1 | 1 | 2 |
| 544 Male   | 70 | 172 | 89.5 | 30.25 | 1 | 2 | 3 | 1 | 2 | 2 |
| 545 Male   | 64 | 171 | 75   | 25.65 | 1 | 1 | 2 | 1 | 1 | 2 |
| 546 Female | 78 | 150 | 52   | 23.11 | 1 | 1 | 1 | 1 | 2 | 2 |
| 547 Male   | 66 | 168 | 72   | 25.51 | 2 | 2 | 2 | 2 | 2 | 2 |
| 548 Male   | 72 | 158 | 72   | 28.84 | 1 | 1 | 3 | 1 | 1 | 2 |
| 549 Female | 66 | 155 | 60   | 24.97 | 1 | 2 | 2 | 1 | 2 | 2 |
| 550 Male   | 75 | 168 | 77   | 27.28 | 1 | 1 | 2 | 1 | 2 | 2 |
| 551 Male   | 58 | 170 | 66   | 22.84 | 1 | 2 | 1 | 1 | 2 | 2 |
| 552 Male   | 76 | 160 | 65   | 25.39 | 1 | 2 | 2 | 1 | 2 | 2 |
| 553 Male   | 67 | 173 | 105  | 35.08 | 1 | 1 | 3 | 1 | 1 | 2 |
| 554 Female | 86 | 150 | 46.5 | 20.67 | 2 | 1 | 1 | 1 | 2 | 2 |
| 555 Male   | 64 | 174 | 73   | 24.11 | 1 | 1 | 2 | 1 | 2 | 1 |
| 556 Male   | 76 | 167 | 77   | 27.61 | 1 | 2 | 2 | 1 | 2 | 2 |
| 557 Male   | 76 | 178 | 70   | 22.09 | 2 | 1 | 1 | 2 | 1 | 2 |
| 558 Male   | 64 | 178 | 95   | 29.98 | 1 | 1 | 3 | 1 | 2 | 1 |
| 559 Male   | 54 | 171 | 69   | 23.60 | 2 | 2 | 1 | 1 | 2 | 1 |

|            |    |     |      |       |   |   |   |   |   |   |
|------------|----|-----|------|-------|---|---|---|---|---|---|
| 560 Male   | 49 | 170 | 75   | 25.95 | 1 | 1 | 2 | 1 | 2 | 1 |
| 561 Male   | 49 | 175 | 84   | 27.43 | 1 | 2 | 2 | 1 | 1 | 1 |
| 562 Male   | 50 | 173 | 130  | 43.44 | 1 | 1 | 3 | 1 | 1 | 1 |
| 563 Male   | 80 | 170 | 62   | 21.45 | 1 | 2 | 1 | 1 | 2 | 1 |
| 564 Male   | 66 | 155 | 47   | 19.56 | 2 | 2 | 1 | 2 | 2 | 1 |
| 565 Male   | 78 | 167 | 70   | 25.10 | 1 | 1 | 2 | 1 | 1 | 1 |
| 566 Male   | 79 | 174 | 74.5 | 24.61 | 1 | 1 | 2 | 1 | 2 | 2 |
| 567 Male   | 65 | 164 | 80   | 29.74 | 1 | 2 | 3 | 1 | 2 | 1 |
| 568 Male   | 55 | 175 | 76   | 24.82 | 1 | 2 | 2 | 1 | 2 | 1 |
| 569 Male   | 79 | 163 | 68   | 25.59 | 2 | 1 | 2 | 1 | 2 | 2 |
| 570 Male   | 67 | 174 | 79   | 26.09 | 1 | 1 | 2 | 1 | 2 | 1 |
| 571 Male   | 65 | 172 | 72.5 | 24.51 | 2 | 2 | 2 | 1 | 2 | 2 |
| 572 Female | 61 | 163 | 92   | 34.63 | 1 | 1 | 3 | 1 | 1 | 2 |
| 573 Male   | 80 | 170 | 80   | 27.68 | 1 | 1 | 2 | 1 | 2 | 1 |
| 574 Female | 69 | 168 | 76   | 26.93 | 2 | 2 | 2 | 2 | 2 | 2 |
| 575 Female | 63 | 159 | 69   | 27.29 | 2 | 1 | 2 | 2 | 2 | 2 |
| 576 Male   | 63 | 176 | 84   | 27.12 | 1 | 1 | 2 | 1 | 2 | 1 |
| 577 Female | 77 | 157 | 60   | 24.34 | 1 | 2 | 2 | 1 | 1 | 2 |
| 578 Male   | 74 | 172 | 66   | 22.31 | 2 | 2 | 1 | 2 | 1 | 1 |
| 579 Female | 69 | 158 | 78   | 31.24 | 2 | 2 | 3 | 2 | 2 | 2 |
| 580 Male   | 50 | 170 | 70   | 24.22 | 1 | 1 | 2 | 1 | 2 | 2 |
| 581 Female | 57 | 163 | 69   | 25.97 | 1 | 1 | 2 | 1 | 2 | 2 |
| 582 Male   | 81 | 150 | 90   | 40.00 | 1 | 1 | 3 | 1 | 1 | 1 |
| 583 Male   | 73 | 172 | 74   | 25.01 | 1 | 2 | 2 | 1 | 2 | 2 |
| 584 Male   | 55 | 176 | 102  | 32.93 | 2 | 1 | 3 | 1 | 2 | 1 |
| 585 Male   | 78 | 172 | 83   | 28.06 | 1 | 1 | 3 | 1 | 1 | 2 |
| 586 Male   | 59 | 172 | 97   | 32.79 | 1 | 2 | 3 | 1 | 2 | 1 |
| 587 Female | 63 | 160 | 58   | 22.66 | 1 | 1 | 1 | 1 | 2 | 2 |
| 588 Female | 57 | 160 | 50   | 19.53 | 2 | 1 | 1 | 2 | 2 | 2 |
| 589 Male   | 52 | 165 | 71   | 26.08 | 2 | 1 | 2 | 2 | 2 | 1 |
| 590 Female | 46 | 155 | 59   | 24.56 | 2 | 2 | 2 | 2 | 2 | 2 |
| 591 Female | 68 | 152 | 62   | 26.84 | 2 | 2 | 2 | 2 | 2 | 2 |
| 592 Female | 55 | 167 | 80   | 28.69 | 2 | 2 | 3 | 1 | 2 | 2 |
| 593 Male   | 37 | 177 | 103  | 32.88 | 2 | 1 | 3 | 2 | 2 | 1 |
| 594 Male   | 76 | 167 | 80   | 28.69 | 1 | 1 | 3 | 1 | 2 | 1 |
| 595 Female | 78 | 160 | 60   | 23.44 | 1 | 1 | 1 | 1 | 2 | 2 |
| 596 Male   | 70 | 175 | 85   | 27.76 | 2 | 2 | 2 | 1 | 2 | 1 |
| 597 Male   | 53 | 166 | 70   | 25.40 | 1 | 1 | 2 | 1 | 1 | 1 |
| 598 Female | 73 | 158 | 70   | 28.04 | 1 | 1 | 3 | 1 | 1 | 2 |
| 599 Male   | 69 | 175 | 75   | 24.49 | 1 | 1 | 2 | 1 | 2 | 2 |

|            |    |     |      |       |   |   |   |   |   |   |
|------------|----|-----|------|-------|---|---|---|---|---|---|
| 600 Female | 81 | 146 | 53   | 24.86 | 2 | 1 | 2 | 2 | 2 | 2 |
| 601 Male   | 68 | 170 | 81   | 28.03 | 1 | 1 | 3 | 1 | 2 | 2 |
| 602 Female | 73 | 157 | 62   | 25.15 | 1 | 2 | 2 | 1 | 2 | 2 |
| 603 Male   | 58 | 178 | 70   | 22.09 | 2 | 1 | 1 | 2 | 2 | 1 |
| 604 Male   | 68 | 167 | 68   | 24.38 | 2 | 1 | 2 | 2 | 1 | 1 |
| 605 Female | 60 | 165 | 75   | 27.55 | 1 | 2 | 2 | 1 | 1 | 1 |
| 606 Male   | 55 | 174 | 73   | 24.11 | 2 | 2 | 2 | 1 | 2 | 1 |
| 607 Male   | 56 | 170 | 81   | 28.03 | 2 | 2 | 3 | 1 | 1 | 1 |
| 608 Female | 65 | 161 | 69   | 26.62 | 1 | 2 | 2 | 1 | 1 | 2 |
| 609 Female | 69 | 160 | 56   | 21.88 | 2 | 2 | 1 | 2 | 1 | 2 |
| 610 Male   | 61 | 164 | 64   | 23.80 | 2 | 1 | 1 | 2 | 1 | 1 |
| 611 Male   | 72 | 171 | 83.5 | 28.56 | 2 | 2 | 3 | 1 | 2 | 2 |
| 612 Male   | 57 | 180 | 75   | 23.15 | 2 | 2 | 1 | 2 | 2 | 2 |
| 613 Female | 66 | 150 | 54   | 24.00 | 2 | 1 | 2 | 2 | 2 | 1 |
| 614 Male   | 69 | 175 | 76   | 24.82 | 1 | 1 | 2 | 1 | 2 | 1 |
| 615 Female | 71 | 154 | 50   | 21.08 | 1 | 1 | 1 | 1 | 2 | 2 |
| 616 Male   | 76 | 169 | 55   | 19.26 | 2 | 2 | 1 | 2 | 2 | 1 |
| 617 Male   | 82 | 170 | 65   | 22.49 | 1 | 1 | 1 | 1 | 2 | 1 |
| 618 Male   | 52 | 160 | 60   | 23.44 | 2 | 2 | 1 | 2 | 2 | 1 |
| 619 Female | 75 | 158 | 60   | 24.03 | 1 | 1 | 2 | 1 | 1 | 2 |
| 620 Male   | 59 | 169 | 73   | 25.56 | 2 | 2 | 2 | 2 | 2 | 2 |
| 621 Male   | 56 | 170 | 65   | 22.49 | 2 | 2 | 1 | 2 | 2 | 1 |
| 622 Male   | 74 | 171 | 69   | 23.60 | 1 | 1 | 1 | 1 | 1 | 1 |
| 623 Female | 55 | 152 | 56   | 24.24 | 1 | 1 | 2 | 1 | 1 | 2 |
| 624 Female | 76 | 156 | 54   | 22.19 | 2 | 2 | 1 | 2 | 2 | 2 |
| 625 Male   | 60 | 175 | 75   | 24.49 | 1 | 2 | 2 | 1 | 2 | 1 |
| 626 Female | 67 | 158 | 62   | 24.84 | 1 | 2 | 2 | 1 | 2 | 2 |
| 627 Male   | 71 | 170 | 73   | 25.26 | 2 | 2 | 2 | 2 | 2 | 1 |
| 628 Female | 76 | 160 | 55   | 21.48 | 1 | 1 | 1 | 1 | 1 | 2 |
| 629 Male   | 78 | 178 | 71   | 22.41 | 1 | 2 | 1 | 1 | 2 | 2 |
| 630 Male   | 71 | 167 | 67   | 24.02 | 1 | 1 | 2 | 1 | 2 | 2 |
| 631 Male   | 48 | 173 | 85   | 28.40 | 2 | 1 | 3 | 2 | 1 | 1 |
| 632 Female | 67 | 156 | 77   | 31.64 | 2 | 2 | 3 | 1 | 1 | 2 |
| 633 Male   | 41 | 160 | 63   | 24.61 | 2 | 2 | 2 | 2 | 2 | 1 |
| 634 Female | 81 | 150 | 48   | 21.33 | 1 | 2 | 1 | 1 | 1 | 2 |
| 635 Male   | 63 | 174 | 80   | 26.42 | 1 | 1 | 2 | 1 | 2 | 2 |
| 636 Male   | 55 | 165 | 77   | 28.28 | 2 | 1 | 3 | 2 | 2 | 1 |
| 637 Male   | 54 | 165 | 52   | 19.10 | 1 | 2 | 1 | 1 | 2 | 1 |
| 638 Male   | 56 | 173 | 85   | 28.40 | 2 | 2 | 3 | 2 | 2 | 1 |
| 639 Female | 68 | 160 | 70   | 27.34 | 1 | 2 | 2 | 1 | 2 | 2 |



|            |    |     |      |       |   |   |   |   |   |   |
|------------|----|-----|------|-------|---|---|---|---|---|---|
| 640 Female | 74 | 158 | 52   | 20.83 | 1 | 2 | 1 | 1 | 2 | 2 |
| 641 Female | 63 | 160 | 57   | 22.27 | 1 | 2 | 1 | 1 | 1 | 2 |
| 642 Male   | 78 | 170 | 87   | 30.10 | 1 | 1 | 3 | 1 | 2 | 1 |
| 643 Male   | 47 | 170 | 78   | 26.99 | 2 | 2 | 2 | 2 | 2 | 1 |
| 644 Female | 59 | 160 | 53   | 20.70 | 2 | 2 | 1 | 2 | 2 | 2 |
| 645 Male   | 57 | 178 | 86.5 | 27.30 | 1 | 2 | 2 | 1 | 2 | 1 |
| 646 Female | 78 | 157 | 53.5 | 21.70 | 1 | 1 | 1 | 1 | 1 | 2 |
| 647 Male   | 65 | 174 | 83   | 27.41 | 2 | 2 | 2 | 1 | 2 | 1 |
| 648 Male   | 52 | 180 | 81   | 25.00 | 1 | 1 | 2 | 1 | 2 | 2 |
| 649 Female | 54 | 152 | 61.5 | 26.62 | 1 | 1 | 2 | 1 | 2 | 2 |
| 650 Female | 75 | 148 | 59   | 26.94 | 2 | 1 | 2 | 2 | 2 | 2 |
| 651 Male   | 63 | 169 | 57   | 19.96 | 1 | 1 | 1 | 1 | 2 | 1 |
| 652 Female | 55 | 166 | 61   | 22.14 | 2 | 1 | 1 | 2 | 2 | 2 |
| 653 Male   | 62 | 178 | 83   | 26.20 | 1 | 2 | 2 | 1 | 2 | 1 |
| 654 Female | 68 | 150 | 60   | 26.67 | 1 | 1 | 2 | 1 | 2 | 2 |
| 655 Female | 80 | 156 | 78.5 | 32.26 | 1 | 1 | 3 | 1 | 2 | 2 |
| 656 Male   | 53 | 170 | 83   | 28.72 | 1 | 1 | 3 | 1 | 1 | 1 |
| 657 Female | 64 | 164 | 65   | 24.17 | 1 | 1 | 2 | 1 | 1 | 2 |
| 658 Female | 69 | 160 | 67   | 26.17 | 1 | 1 | 2 | 1 | 1 | 1 |
| 659 Female | 63 | 160 | 71   | 27.73 | 1 | 1 | 2 | 1 | 1 | 2 |
| 660 Male   | 79 | 170 | 84   | 29.07 | 1 | 2 | 3 | 1 | 2 | 2 |
| 661 Male   | 75 | 173 | 69   | 23.05 | 2 | 2 | 1 | 1 | 2 | 1 |
| 662 Male   | 79 | 168 | 76   | 26.93 | 2 | 2 | 2 | 2 | 2 | 2 |
| 663 Male   | 70 | 165 | 76   | 27.92 | 1 | 2 | 2 | 1 | 2 | 1 |
| 664 Male   | 56 | 176 | 81   | 26.15 | 1 | 1 | 2 | 1 | 1 | 1 |
| 665 Male   | 70 | 168 | 80   | 28.34 | 1 | 1 | 3 | 1 | 2 | 1 |
| 666 Male   | 71 | 156 | 70   | 28.76 | 1 | 2 | 3 | 1 | 2 | 2 |
| 667 Male   | 72 | 166 | 70   | 25.40 | 2 | 2 | 2 | 2 | 1 | 2 |
| 668 Male   | 65 | 180 | 91   | 28.09 | 2 | 1 | 3 | 1 | 1 | 1 |
| 669 Male   | 80 | 170 | 73   | 25.26 | 1 | 1 | 2 | 1 | 1 | 2 |
| 670 Male   | 49 | 167 | 84.5 | 30.30 | 1 | 1 | 3 | 1 | 1 | 1 |
| 671 Male   | 75 | 170 | 63   | 21.80 | 2 | 1 | 1 | 2 | 2 | 2 |
| 672 Female | 53 | 158 | 70   | 28.04 | 1 | 1 | 3 | 1 | 2 | 1 |
| 673 Female | 57 | 150 | 61   | 27.11 | 1 | 2 | 2 | 1 | 2 | 2 |
| 674 Male   | 61 | 183 | 99   | 29.56 | 2 | 1 | 3 | 2 | 1 | 1 |
| 675 Male   | 68 | 169 | 80   | 28.01 | 2 | 1 | 3 | 2 | 1 | 1 |
| 676 Male   | 54 | 175 | 70   | 22.86 | 2 | 2 | 1 | 2 | 2 | 1 |
| 677 Male   | 50 | 168 | 83   | 29.41 | 2 | 2 | 3 | 1 | 2 | 2 |
| 678 Male   | 52 | 170 | 79   | 27.34 | 1 | 1 | 2 | 1 | 1 | 1 |
| 679 Female | 78 | 167 | 76   | 27.25 | 2 | 1 | 2 | 2 | 2 | 2 |

|            |    |     |      |       |   |   |   |   |   |   |
|------------|----|-----|------|-------|---|---|---|---|---|---|
| 680 Male   | 56 | 168 | 72   | 25.51 | 1 | 1 | 2 | 1 | 1 | 1 |
| 681 Female | 64 | 150 | 50   | 22.22 | 2 | 2 | 1 | 2 | 2 | 2 |
| 682 Male   | 80 | 172 | 83   | 28.06 | 1 | 2 | 3 | 1 | 2 | 1 |
| 683 Male   | 57 | 170 | 70   | 24.22 | 2 | 1 | 2 | 2 | 1 | 1 |
| 684 Male   | 78 | 169 | 52   | 18.21 | 1 | 2 | 1 | 1 | 1 | 2 |
| 685 Female | 65 | 157 | 75   | 30.43 | 1 | 1 | 3 | 1 | 2 | 2 |
| 686 Male   | 59 | 178 | 80   | 25.25 | 2 | 2 | 2 | 2 | 2 | 1 |
| 687 Male   | 85 | 174 | 62   | 20.48 | 2 | 2 | 1 | 2 | 2 | 1 |
| 688 Male   | 65 | 173 | 68   | 22.72 | 1 | 1 | 1 | 1 | 2 | 1 |
| 689 Male   | 61 | 165 | 80   | 29.38 | 2 | 2 | 3 | 2 | 2 | 1 |
| 690 Female | 60 | 162 | 65   | 24.77 | 1 | 1 | 2 | 1 | 1 | 2 |
| 691 Female | 68 | 168 | 104  | 36.85 | 1 | 2 | 3 | 1 | 2 | 2 |
| 692 Male   | 59 | 172 | 69   | 23.32 | 1 | 2 | 1 | 1 | 1 | 1 |
| 693 Male   | 75 | 170 | 59   | 20.42 | 2 | 2 | 1 | 2 | 2 | 2 |
| 694 Male   | 60 | 172 | 84   | 28.39 | 1 | 2 | 3 | 1 | 1 | 1 |
| 695 Male   | 50 | 179 | 88   | 27.46 | 1 | 1 | 2 | 1 | 2 | 1 |
| 696 Female | 64 | 167 | 75   | 26.89 | 1 | 1 | 2 | 1 | 2 | 2 |
| 697 Male   | 70 | 166 | 80   | 29.03 | 1 | 2 | 3 | 1 | 2 | 2 |
| 698 Male   | 55 | 165 | 82   | 30.12 | 1 | 1 | 3 | 1 | 2 | 2 |
| 699 Male   | 65 | 170 | 84   | 29.07 | 1 | 2 | 3 | 1 | 2 | 1 |
| 700 Male   | 52 | 170 | 96   | 33.22 | 1 | 2 | 3 | 1 | 2 | 2 |
| 701 Male   | 59 | 170 | 62   | 21.45 | 1 | 2 | 1 | 1 | 2 | 1 |
| 702 Male   | 67 | 169 | 65   | 22.76 | 1 | 2 | 1 | 1 | 2 | 1 |
| 703 Female | 62 | 158 | 69.5 | 27.84 | 1 | 1 | 2 | 1 | 1 | 2 |
| 704 Male   | 55 | 165 | 60   | 22.04 | 2 | 2 | 1 | 2 | 2 | 2 |
| 705 Female | 62 | 160 | 65   | 25.39 | 1 | 1 | 2 | 1 | 2 | 2 |
| 706 Male   | 61 | 173 | 85   | 28.40 | 1 | 1 | 3 | 1 | 1 | 1 |
| 707 Male   | 41 | 162 | 84   | 32.01 | 2 | 1 | 3 | 1 | 2 | 1 |
| 708 Male   | 61 | 170 | 69   | 23.88 | 1 | 1 | 1 | 1 | 2 | 1 |
| 709 Male   | 51 | 160 | 68   | 26.56 | 1 | 2 | 2 | 1 | 2 | 1 |
| 710 Female | 84 | 160 | 54   | 21.09 | 1 | 2 | 1 | 1 | 1 | 2 |
| 711 Female | 46 | 160 | 79   | 30.86 | 1 | 2 | 3 | 1 | 2 | 2 |
| 712 Female | 59 | 160 | 70   | 27.34 | 1 | 2 | 2 | 1 | 1 | 2 |
| 713 Male   | 62 | 165 | 58   | 21.30 | 1 | 1 | 1 | 1 | 1 | 1 |
| 714 Male   | 53 | 170 | 78   | 26.99 | 1 | 1 | 2 | 1 | 1 | 1 |
| 715 Male   | 47 | 170 | 75   | 25.95 | 1 | 2 | 2 | 1 | 2 | 1 |
| 716 Male   | 67 | 172 | 69   | 23.32 | 2 | 2 | 1 | 2 | 2 | 2 |
| 717 Female | 62 | 160 | 54   | 21.09 | 1 | 1 | 1 | 1 | 2 | 2 |
| 718 Male   | 62 | 174 | 80   | 26.42 | 1 | 1 | 2 | 1 | 2 | 2 |
| 719 Female | 71 | 157 | 69.5 | 28.20 | 2 | 2 | 3 | 1 | 2 | 2 |

|            |    |       |      |       |   |   |   |   |   |   |
|------------|----|-------|------|-------|---|---|---|---|---|---|
| 720 Male   | 56 | 173   | 102  | 34.08 | 1 | 1 | 3 | 1 | 1 | 1 |
| 721 Male   | 73 | 165   | 63   | 23.14 | 2 | 1 | 1 | 1 | 2 | 2 |
| 722 Male   | 46 | 170   | 75   | 25.95 | 1 | 2 | 2 | 1 | 2 | 2 |
| 723 Male   | 78 | 170   | 75   | 25.95 | 2 | 2 | 2 | 2 | 1 | 2 |
| 724 Male   | 59 | 170   | 85   | 29.41 | 1 | 2 | 3 | 1 | 2 | 1 |
| 725 Male   | 61 | 173   | 71   | 23.72 | 2 | 1 | 1 | 2 | 2 | 1 |
| 726 Male   | 39 | 177   | 77   | 24.58 | 1 | 2 | 2 | 1 | 2 | 1 |
| 727 Female | 73 | 160   | 65   | 25.39 | 1 | 1 | 2 | 1 | 2 | 2 |
| 728 Male   | 56 | 172   | 84   | 28.39 | 1 | 2 | 3 | 1 | 2 | 1 |
| 729 Male   | 74 | 158   | 69   | 27.64 | 2 | 2 | 2 | 1 | 2 | 1 |
| 730 Female | 67 | 155   | 60   | 24.97 | 1 | 2 | 2 | 1 | 2 | 2 |
| 731 Male   | 57 | 178   | 96   | 30.30 | 1 | 2 | 3 | 1 | 2 | 2 |
| 732 Female | 73 | 158   | 60   | 24.03 | 1 | 2 | 2 | 1 | 2 | 2 |
| 733 Male   | 85 | 167   | 77   | 27.61 | 1 | 2 | 2 | 1 | 2 | 2 |
| 734 Female | 71 | 152   | 69   | 29.86 | 1 | 1 | 3 | 1 | 1 | 2 |
| 735 Female | 60 | 148   | 54   | 24.65 | 1 | 2 | 2 | 1 | 2 | 2 |
| 736 Male   | 69 | 180   | 75   | 23.15 | 1 | 1 | 1 | 1 | 2 | 1 |
| 737 Male   | 58 | 160   | 64   | 25.00 | 2 | 2 | 2 | 2 | 2 | 1 |
| 738 Male   | 61 | 169   | 75   | 26.26 | 2 | 2 | 2 | 1 | 2 | 2 |
| 739 Female | 60 | 160   | 77   | 30.08 | 1 | 1 | 3 | 1 | 1 | 2 |
| 740 Female | 74 | 153   | 56   | 23.92 | 1 | 2 | 1 | 1 | 2 | 2 |
| 741 Female | 62 | 163   | 65   | 24.46 | 2 | 2 | 2 | 2 | 2 | 2 |
| 742 Male   | 61 | 188   | 101  | 28.58 | 1 | 2 | 3 | 1 | 2 | 1 |
| 743 Male   | 77 | 170   | 59   | 20.42 | 2 | 2 | 1 | 1 | 2 | 1 |
| 744 Male   | 52 | 170   | 100  | 34.60 | 1 | 1 | 3 | 1 | 1 | 1 |
| 745 Female | 67 | 153   | 65   | 27.77 | 2 | 1 | 2 | 2 | 1 | 2 |
| 746 Male   | 71 | 177   | 86   | 27.45 | 1 | 1 | 2 | 1 | 1 | 1 |
| 747 Male   | 55 | 172   | 70   | 23.66 | 1 | 1 | 1 | 1 | 2 | 1 |
| 748 Male   | 74 | 170   | 73   | 25.26 | 2 | 2 | 2 | 2 | 2 | 1 |
| 749 Male   | 44 | 170   | 66   | 22.84 | 2 | 1 | 1 | 1 | 2 | 2 |
| 750 Male   | 54 | 170   | 84   | 29.07 | 2 | 2 | 3 | 1 | 2 | 1 |
| 751 Female | 64 | 154   | 70   | 29.52 | 1 | 1 | 3 | 1 | 1 | 2 |
| 752 Female | 54 | 156   | 66   | 27.12 | 2 | 2 | 2 | 2 | 2 | 2 |
| 753 Male   | 69 | 176   | 76.5 | 24.70 | 2 | 1 | 2 | 2 | 2 | 2 |
| 754 Female | 73 | 160   | 67   | 26.17 | 1 | 1 | 2 | 1 | 1 | 2 |
| 755 Female | 61 | 157   | 65   | 26.37 | 2 | 2 | 2 | 2 | 2 | 2 |
| 756 Female | 74 | 160   | 91   | 35.55 | 1 | 1 | 3 | 1 | 2 | 2 |
| 757 Female | 54 | 155   | 78   | 32.47 | 2 | 1 | 3 | 2 | 2 | 2 |
| 758 Male   | 58 | 165.5 | 75   | 27.38 | 1 | 2 | 2 | 1 | 2 | 1 |
| 759 Male   | 67 | 175   | 59   | 19.27 | 1 | 1 | 1 | 1 | 2 | 2 |

|            |    |       |      |       |   |   |   |   |   |   |
|------------|----|-------|------|-------|---|---|---|---|---|---|
| 760 Male   | 56 | 166   | 79.5 | 28.85 | 1 | 1 | 3 | 1 | 2 | 1 |
| 761 Male   | 62 | 177.5 | 87.4 | 27.74 | 2 | 1 | 2 | 2 | 2 | 1 |
| 762 Male   | 50 | 170   | 87   | 30.10 | 1 | 1 | 3 | 1 | 2 | 1 |
| 763 Male   | 54 | 169   | 58   | 20.31 | 1 | 1 | 1 | 1 | 1 | 1 |
| 764 Male   | 60 | 175   | 121  | 39.51 | 1 | 2 | 3 | 1 | 2 | 2 |
| 765 Male   | 56 | 168   | 66.2 | 23.46 | 1 | 1 | 1 | 1 | 2 | 2 |
| 766 Female | 68 | 152.5 | 72.5 | 31.17 | 1 | 2 | 3 | 1 | 1 | 2 |
| 767 Female | 69 | 157.5 | 70.9 | 28.58 | 2 | 2 | 3 | 2 | 2 | 2 |
| 768 Female | 75 | 159   | 57   | 22.55 | 2 | 1 | 1 | 1 | 2 | 2 |
| 769 Female | 75 | 163   | 80   | 30.11 | 1 | 1 | 3 | 1 | 2 | 1 |
| 770 Female | 62 | 156   | 59   | 24.24 | 2 | 2 | 2 | 1 | 1 | 2 |
| 771 Male   | 62 | 169   | 84   | 29.41 | 1 | 1 | 3 | 1 | 1 | 1 |
| 772 Female | 82 | 150   | 56   | 24.89 | 1 | 1 | 2 | 1 | 2 | 2 |
| 773 Male   | 72 | 167   | 64   | 22.95 | 1 | 2 | 1 | 1 | 2 | 2 |
| 774 Male   | 55 | 164.5 | 68.5 | 25.31 | 1 | 1 | 2 | 1 | 1 | 1 |
| 775 Male   | 59 | 157   | 69.3 | 28.11 | 1 | 2 | 3 | 1 | 2 | 2 |
| 776 Female | 77 | 157   | 71   | 28.80 | 1 | 1 | 3 | 1 | 2 | 2 |
| 777 Male   | 66 | 173   | 102  | 34.08 | 1 | 1 | 3 | 1 | 1 | 1 |
| 778 Male   | 59 | 177   | 97   | 30.96 | 1 | 1 | 3 | 1 | 1 | 1 |
| 779 Female | 47 | 160   | 83.2 | 32.50 | 1 | 1 | 3 | 1 | 1 | 2 |
| 780 Male   | 72 | 166.5 | 74.6 | 26.91 | 1 | 1 | 2 | 1 | 2 | 2 |
| 781 Male   | 57 | 163   | 67.9 | 25.56 | 1 | 1 | 2 | 1 | 2 | 1 |
| 782 Male   | 64 | 170   | 56   | 19.38 | 2 | 2 | 1 | 1 | 1 | 1 |
| 783 Female | 80 | 149   | 54.5 | 24.55 | 1 | 2 | 2 | 1 | 1 | 1 |
| 784 Female | 71 | 166   | 49   | 17.78 | 2 | 2 | 1 | 2 | 2 | 2 |
| 785 Female | 51 | 167   | 77   | 27.61 | 1 | 1 | 2 | 1 | 1 | 2 |
| 786 Female | 78 | 158.5 | 55.6 | 22.13 | 1 | 1 | 1 | 1 | 2 | 2 |
| 787 Male   | 50 | 173   | 80   | 26.73 | 1 | 2 | 2 | 1 | 2 | 1 |
| 788 Female | 62 | 158.5 | 60.1 | 23.92 | 2 | 2 | 1 | 2 | 1 | 2 |
| 789 Female | 75 | 152   | 70   | 30.30 | 1 | 1 | 3 | 1 | 1 | 2 |
| 790 Male   | 81 | 173   | 71   | 23.72 | 1 | 1 | 1 | 1 | 1 | 1 |
| 791 Male   | 60 | 159   | 59   | 23.34 | 2 | 1 | 1 | 2 | 2 | 1 |
| 792 Male   | 61 | 167.5 | 73   | 26.02 | 1 | 1 | 2 | 1 | 2 | 1 |
| 793 Female | 76 | 151.5 | 64.1 | 27.93 | 1 | 2 | 2 | 1 | 2 | 2 |
| 794 Female | 80 | 152   | 71.6 | 30.99 | 1 | 1 | 3 | 1 | 2 | 2 |
| 795 Male   | 66 | 171.5 | 80.5 | 27.37 | 1 | 1 | 2 | 1 | 1 | 2 |
| 796 Female | 69 | 162   | 60   | 22.86 | 2 | 2 | 1 | 2 | 2 | 2 |
| 797 Female | 64 | 154.5 | 78.6 | 32.93 | 2 | 2 | 3 | 1 | 2 | 2 |
| 798 Male   | 57 | 170.5 | 85   | 29.24 | 2 | 2 | 3 | 1 | 2 | 1 |
| 799 Male   | 54 | 171.5 | 82   | 27.88 | 1 | 2 | 2 | 1 | 1 | 1 |

|            |    |       |       |       |   |   |   |   |   |   |
|------------|----|-------|-------|-------|---|---|---|---|---|---|
| 800 Male   | 76 | 166   | 76.9  | 27.91 | 1 | 1 | 2 | 1 | 2 | 1 |
| 801 Male   | 56 | 173   | 84.8  | 28.33 | 2 | 1 | 3 | 2 | 1 | 2 |
| 802 Female | 59 | 149.5 | 54    | 24.16 | 2 | 2 | 2 | 2 | 2 | 2 |
| 803 Female | 70 | 155.5 | 69.2  | 28.62 | 1 | 2 | 3 | 1 | 2 | 2 |
| 804 Female | 72 | 151.5 | 51.3  | 22.35 | 1 | 2 | 1 | 1 | 2 | 2 |
| 805 Female | 72 | 155.5 | 72.5  | 29.98 | 1 | 1 | 3 | 1 | 1 | 1 |
| 806 Male   | 53 | 177.5 | 81    | 25.71 | 2 | 2 | 2 | 2 | 2 | 1 |
| 807 Male   | 58 | 166   | 67.3  | 24.42 | 2 | 1 | 2 | 1 | 2 | 2 |
| 808 Male   | 51 | 178   | 82.8  | 26.13 | 1 | 1 | 2 | 1 | 2 | 1 |
| 809 Male   | 42 | 174   | 91.1  | 30.09 | 2 | 2 | 3 | 2 | 2 | 1 |
| 810 Male   | 84 | 157.5 | 71.4  | 28.78 | 2 | 1 | 3 | 2 | 1 | 2 |
| 811 Male   | 58 | 172   | 72.5  | 24.51 | 2 | 2 | 2 | 2 | 2 | 1 |
| 812 Male   | 58 | 172   | 70    | 23.66 | 1 | 1 | 1 | 1 | 2 | 1 |
| 813 Male   | 44 | 165   | 80.1  | 29.42 | 2 | 2 | 3 | 1 | 1 | 1 |
| 814 Female | 78 | 152.5 | 62.5  | 26.87 | 1 | 1 | 2 | 1 | 2 | 2 |
| 815 Male   | 57 | 180   | 76    | 23.46 | 2 | 1 | 1 | 2 | 2 | 1 |
| 816 Female | 59 | 166   | 69.4  | 25.19 | 2 | 1 | 2 | 2 | 2 | 2 |
| 817 Male   | 74 | 166.5 | 79.7  | 28.75 | 1 | 1 | 3 | 1 | 1 | 1 |
| 818 Male   | 57 | 161   | 62.6  | 24.15 | 2 | 1 | 2 | 2 | 2 | 1 |
| 819 Male   | 56 | 169.5 | 73    | 25.41 | 2 | 2 | 2 | 2 | 2 | 1 |
| 820 Male   | 66 | 169.5 | 72.9  | 25.37 | 1 | 1 | 2 | 1 | 2 | 2 |
| 821 Male   | 46 | 173   | 94    | 31.41 | 1 | 1 | 3 | 1 | 2 | 1 |
| 822 Female | 71 | 148   | 55.5  | 25.34 | 1 | 2 | 2 | 1 | 1 | 2 |
| 823 Male   | 55 | 166   | 79    | 28.67 | 1 | 1 | 3 | 1 | 2 | 1 |
| 824 Female | 42 | 158   | 61.8  | 24.76 | 2 | 1 | 2 | 2 | 2 | 2 |
| 825 Male   | 59 | 162.5 | 74    | 28.02 | 2 | 1 | 3 | 1 | 1 | 1 |
| 826 Female | 80 | 160   | 69.8  | 27.27 | 1 | 1 | 2 | 1 | 2 | 2 |
| 827 Male   | 71 | 166   | 67.8  | 24.60 | 2 | 1 | 2 | 2 | 2 | 2 |
| 828 Male   | 72 | 163   | 56.3  | 21.19 | 2 | 2 | 1 | 1 | 2 | 1 |
| 829 Male   | 79 | 170   | 82.7  | 28.62 | 2 | 1 | 3 | 2 | 1 | 2 |
| 830 Male   | 77 | 170   | 66.3  | 22.94 | 1 | 1 | 1 | 1 | 1 | 2 |
| 831 Male   | 77 | 171   | 77    | 26.33 | 1 | 2 | 2 | 1 | 2 | 1 |
| 832 Male   | 76 | 160   | 77    | 30.08 | 1 | 2 | 3 | 1 | 2 | 1 |
| 833 Male   | 78 | 174   | 76.5  | 25.27 | 2 | 2 | 2 | 2 | 2 | 2 |
| 834 Male   | 56 | 168   | 72    | 25.51 | 2 | 2 | 2 | 2 | 2 | 1 |
| 835 Male   | 76 | 174   | 79    | 26.09 | 1 | 2 | 2 | 1 | 1 | 2 |
| 836 Male   | 71 | 170   | 71.5  | 24.74 | 1 | 1 | 2 | 1 | 1 | 2 |
| 837 Female | 69 | 160   | 65    | 25.39 | 1 | 2 | 2 | 1 | 1 | 2 |
| 838 Male   | 44 | 178   | 84.9  | 26.80 | 2 | 1 | 2 | 2 | 2 | 1 |
| 839 Male   | 60 | 181.5 | 84.68 | 25.71 | 1 | 2 | 2 | 1 | 2 | 1 |

|            |    |       |       |       |   |   |   |   |   |   |
|------------|----|-------|-------|-------|---|---|---|---|---|---|
| 840 Female | 80 | 160   | 65    | 25.39 | 1 | 1 | 2 | 1 | 2 | 2 |
| 841 Female | 80 | 155   | 61    | 25.39 | 1 | 2 | 2 | 1 | 2 | 2 |
| 842 Male   | 72 | 158   | 63.5  | 25.44 | 1 | 2 | 2 | 1 | 2 | 1 |
| 843 Male   | 60 | 172   | 62    | 20.96 | 1 | 2 | 1 | 1 | 1 | 1 |
| 844 Male   | 85 | 168   | 70    | 24.80 | 2 | 2 | 2 | 2 | 2 | 2 |
| 845 Male   | 61 | 165   | 70.6  | 25.93 | 1 | 1 | 2 | 1 | 2 | 2 |
| 846 Female | 62 | 160   | 73    | 28.52 | 1 | 2 | 3 | 1 | 2 | 2 |
| 847 Male   | 69 | 164.5 | 79.5  | 29.38 | 1 | 1 | 3 | 1 | 1 | 1 |
| 848 Female | 75 | 157   | 53.6  | 21.75 | 1 | 1 | 1 | 1 | 2 | 2 |
| 849 Male   | 79 | 166   | 65.4  | 23.73 | 1 | 1 | 1 | 1 | 2 | 2 |
| 850 Female | 72 | 155   | 61.2  | 25.47 | 1 | 1 | 2 | 1 | 2 | 2 |
| 851 Female | 45 | 164.5 | 71.5  | 26.42 | 1 | 2 | 2 | 1 | 2 | 2 |
| 852 Female | 65 | 164   | 61.8  | 22.98 | 2 | 1 | 1 | 2 | 1 | 2 |
| 853 Male   | 45 | 176   | 87.1  | 28.12 | 1 | 1 | 3 | 1 | 2 | 1 |
| 854 Male   | 47 | 174   | 64.1  | 21.17 | 1 | 2 | 1 | 1 | 1 | 1 |
| 855 Male   | 69 | 165   | 70    | 25.71 | 2 | 1 | 2 | 2 | 2 | 1 |
| 856 Female | 63 | 151   | 58.7  | 25.74 | 1 | 2 | 2 | 1 | 2 | 2 |
| 857 Female | 77 | 159   | 69    | 27.29 | 2 | 1 | 2 | 2 | 2 | 2 |
| 858 Female | 58 | 167   | 73.4  | 26.32 | 2 | 2 | 2 | 2 | 2 | 2 |
| 859 Male   | 69 | 165   | 75    | 27.55 | 2 | 1 | 2 | 2 | 2 | 1 |
| 860 Male   | 55 | 174   | 77.2  | 25.50 | 1 | 2 | 2 | 1 | 1 | 1 |
| 861 Male   | 77 | 176.5 | 60.7  | 19.48 | 2 | 1 | 1 | 2 | 2 | 1 |
| 862 Female | 58 | 160.5 | 73.7  | 28.61 | 1 | 1 | 3 | 1 | 2 | 2 |
| 863 Female | 55 | 164   | 69    | 25.65 | 2 | 2 | 2 | 2 | 1 | 2 |
| 864 Female | 74 | 161.5 | 61    | 23.39 | 1 | 2 | 1 | 1 | 1 | 2 |
| 865 Male   | 53 | 174.5 | 103.9 | 34.12 | 2 | 2 | 3 | 2 | 2 | 1 |
| 866 Female | 81 | 156   | 55    | 22.60 | 1 | 1 | 1 | 1 | 1 | 2 |
| 867 Female | 54 | 164   | 76    | 28.26 | 1 | 2 | 3 | 1 | 2 | 2 |
| 868 Female | 60 | 161   | 61    | 23.53 | 1 | 2 | 1 | 1 | 2 | 2 |
| 869 Male   | 60 | 165   | 59.2  | 21.74 | 2 | 1 | 1 | 2 | 2 | 2 |
| 870 Female | 66 | 149   | 58.1  | 26.17 | 2 | 2 | 2 | 2 | 2 | 2 |
| 871 Female | 57 | 162.5 | 68.4  | 25.90 | 2 | 2 | 2 | 2 | 2 | 1 |
| 872 Female | 74 | 161   | 56.2  | 21.68 | 1 | 1 | 1 | 1 | 2 | 2 |
| 873 Female | 77 | 162   | 80    | 30.48 | 2 | 2 | 3 | 1 | 2 | 1 |
| 874 Female | 80 | 156.5 | 54.5  | 22.25 | 2 | 2 | 1 | 2 | 2 | 2 |
| 875 Male   | 65 | 165   | 69.9  | 25.67 | 1 | 1 | 2 | 1 | 2 | 1 |
| 876 Male   | 53 | 176   | 106   | 34.22 | 1 | 1 | 3 | 1 | 2 | 2 |
| 877 Male   | 51 | 165   | 65    | 23.88 | 2 | 1 | 1 | 2 | 2 | 2 |
| 878 Male   | 49 | 185   | 82    | 23.96 | 2 | 2 | 1 | 2 | 2 | 2 |
| 879 Female | 74 | 158   | 55    | 22.03 | 1 | 1 | 1 | 1 | 1 | 2 |

|            |    |       |      |       |   |   |   |   |   |   |
|------------|----|-------|------|-------|---|---|---|---|---|---|
| 880 Female | 65 | 159.5 | 77   | 30.27 | 2 | 2 | 3 | 1 | 1 | 2 |
| 881 Female | 66 | 154   | 67.8 | 28.59 | 1 | 1 | 3 | 1 | 2 | 2 |
| 882 Female | 56 | 164   | 70   | 26.03 | 1 | 1 | 2 | 1 | 1 | 1 |
| 883 Male   | 62 | 172   | 74.5 | 25.18 | 2 | 1 | 2 | 2 | 2 | 1 |
| 884 Female | 57 | 160   | 58   | 22.66 | 2 | 1 | 1 | 1 | 2 | 2 |
| 885 Male   | 63 | 176   | 90   | 29.05 | 1 | 1 | 3 | 1 | 1 | 1 |
| 886 Male   | 52 | 174   | 79.1 | 26.13 | 1 | 1 | 2 | 1 | 2 | 2 |
| 887 Male   | 71 | 157   | 58.1 | 23.57 | 1 | 2 | 1 | 1 | 2 | 2 |
| 888 Male   | 46 | 173.5 | 84   | 27.90 | 1 | 2 | 2 | 1 | 2 | 2 |
| 889 Male   | 60 | 172.5 | 78.5 | 26.38 | 2 | 2 | 2 | 1 | 1 | 1 |
| 890 Female | 78 | 154   | 74   | 31.20 | 2 | 1 | 3 | 2 | 2 | 2 |
| 891 Male   | 67 | 173   | 100  | 33.41 | 1 | 2 | 3 | 1 | 2 | 2 |
| 892 Male   | 80 | 168   | 84.7 | 30.01 | 1 | 1 | 3 | 1 | 1 | 1 |
| 893 Male   | 63 | 160.5 | 63   | 24.46 | 2 | 1 | 2 | 2 | 1 | 1 |
| 894 Female | 59 | 161.5 | 65.1 | 24.96 | 1 | 2 | 2 | 1 | 1 | 2 |
| 895 Female | 74 | 161   | 54   | 20.83 | 1 | 2 | 1 | 1 | 2 | 2 |
| 896 Female | 59 | 150.5 | 60.9 | 26.89 | 1 | 2 | 2 | 1 | 1 | 2 |
| 897 Male   | 57 | 167   | 73.4 | 26.32 | 1 | 1 | 2 | 2 | 2 | 1 |
| 898 Female | 53 | 163.5 | 76   | 28.43 | 1 | 1 | 3 | 1 | 2 | 1 |
| 899 Male   | 62 | 171   | 71   | 24.28 | 1 | 1 | 2 | 1 | 1 | 1 |
| 900 Female | 77 | 153   | 63.5 | 27.13 | 1 | 2 | 2 | 1 | 2 | 2 |
| 901 Female | 78 | 157   | 76.3 | 30.95 | 1 | 1 | 3 | 1 | 1 | 1 |
| 902 Male   | 69 | 163   | 78.4 | 29.51 | 1 | 1 | 3 | 1 | 2 | 2 |
| 903 Male   | 68 | 170   | 57.1 | 19.76 | 2 | 1 | 1 | 2 | 2 | 2 |
| 904 Female | 57 | 157   | 64   | 25.96 | 2 | 1 | 2 | 2 | 2 | 1 |
| 905 Female | 56 | 153   | 63   | 26.91 | 1 | 2 | 2 | 1 | 1 | 2 |
| 906 Male   | 71 | 168.5 | 82.3 | 28.99 | 1 | 1 | 3 | 1 | 2 | 1 |
| 907 Male   | 56 | 169   | 85.6 | 29.97 | 1 | 1 | 3 | 1 | 2 | 1 |
| 908 Female | 70 | 153.5 | 56.5 | 23.98 | 1 | 1 | 1 | 1 | 1 | 2 |
| 909 Female | 79 | 159   | 79.1 | 31.29 | 1 | 1 | 3 | 1 | 1 | 2 |
| 910 Male   | 60 | 171   | 85   | 29.07 | 1 | 1 | 3 | 1 | 1 | 1 |
| 911 Male   | 58 | 180   | 75   | 23.15 | 2 | 2 | 1 | 2 | 2 | 1 |
| 912 Male   | 72 | 168   | 70   | 24.80 | 1 | 1 | 2 | 1 | 2 | 2 |
| 913 Female | 69 | 159   | 60   | 23.73 | 2 | 1 | 1 | 2 | 2 | 2 |
| 914 Male   | 53 | 163   | 61.7 | 23.22 | 1 | 1 | 1 | 1 | 1 | 1 |
| 915 Male   | 60 | 154   | 88   | 37.11 | 1 | 1 | 3 | 1 | 2 | 2 |
| 916 Male   | 64 | 165.5 | 65   | 23.73 | 2 | 2 | 1 | 1 | 1 | 1 |
| 917 Female | 76 | 161   | 67.2 | 25.92 | 2 | 1 | 2 | 1 | 2 | 2 |
| 918 Male   | 60 | 167.5 | 68   | 24.24 | 1 | 1 | 2 | 1 | 1 | 1 |
| 919 Male   | 62 | 174   | 78   | 25.76 | 1 | 1 | 2 | 1 | 1 | 2 |

|            |    |       |      |       |   |   |   |   |   |   |
|------------|----|-------|------|-------|---|---|---|---|---|---|
| 920 Male   | 81 | 168   | 67   | 23.74 | 2 | 1 | 1 | 1 | 2 | 2 |
| 921 Male   | 69 | 174   | 75   | 24.77 | 2 | 1 | 2 | 2 | 1 | 1 |
| 922 Female | 69 | 159   | 78   | 30.85 | 1 | 1 | 3 | 1 | 1 | 2 |
| 923 Female | 44 | 161   | 91.7 | 35.38 | 2 | 2 | 3 | 1 | 2 | 2 |
| 924 Male   | 82 | 170   | 71   | 24.57 | 1 | 2 | 2 | 1 | 1 | 1 |
| 925 Male   | 57 | 183   | 81.9 | 24.46 | 1 | 1 | 2 | 1 | 2 | 1 |
| 926 Male   | 53 | 166   | 66   | 23.95 | 1 | 1 | 1 | 1 | 1 | 1 |
| 927 Female | 55 | 160   | 60.5 | 23.63 | 1 | 2 | 1 | 1 | 2 | 2 |
| 928 Male   | 57 | 177   | 97   | 30.96 | 2 | 2 | 3 | 1 | 1 | 1 |
| 929 Female | 52 | 169.5 | 80.5 | 28.02 | 1 | 1 | 3 | 1 | 2 | 2 |
| 930 Female | 75 | 165   | 80.4 | 29.53 | 1 | 1 | 3 | 1 | 1 | 2 |
| 931 Female | 70 | 156   | 70.5 | 28.97 | 1 | 2 | 3 | 1 | 1 | 2 |
| 932 Male   | 52 | 180.5 | 78   | 23.94 | 2 | 1 | 1 | 2 | 2 | 1 |
| 933 Female | 78 | 152.5 | 64   | 27.52 | 2 | 1 | 2 | 2 | 1 | 1 |
| 934 Male   | 75 | 166   | 74.1 | 26.89 | 2 | 1 | 2 | 2 | 2 | 2 |
| 935 Male   | 50 | 171   | 91   | 31.12 | 1 | 1 | 3 | 1 | 2 | 1 |
| 936 Male   | 58 | 174   | 76   | 25.10 | 2 | 2 | 2 | 2 | 1 | 2 |
| 937 Female | 68 | 165   | 63.4 | 23.29 | 2 | 1 | 1 | 1 | 1 | 2 |
| 938 Male   | 68 | 170   | 64.4 | 22.28 | 1 | 2 | 1 | 2 | 1 | 1 |
| 939 Male   | 55 | 178.5 | 85.5 | 26.83 | 1 | 1 | 2 | 1 | 2 | 1 |
| 940 Male   | 62 | 185.5 | 95.2 | 27.67 | 1 | 1 | 2 | 1 | 1 | 1 |
| 941 Male   | 59 | 178   | 87.7 | 27.68 | 1 | 1 | 2 | 1 | 1 | 1 |
| 942 Male   | 52 | 183   | 85   | 25.38 | 1 | 2 | 2 | 1 | 2 | 2 |
| 943 Male   | 53 | 176   | 69.5 | 22.44 | 2 | 2 | 1 | 1 | 1 | 1 |
| 944 Female | 71 | 160   | 58.3 | 22.77 | 2 | 2 | 1 | 1 | 2 | 2 |
| 945 Male   | 64 | 172.5 | 84.5 | 28.40 | 1 | 1 | 3 | 1 | 2 | 1 |
| 946 Female | 72 | 151.5 | 56.7 | 24.70 | 1 | 2 | 2 | 1 | 2 | 2 |
| 947 Female | 51 | 166   | 65   | 23.59 | 1 | 1 | 1 | 1 | 2 | 2 |
| 948 Female | 68 | 158   | 73   | 29.24 | 2 | 2 | 3 | 2 | 2 | 2 |
| 949 Female | 63 | 162.5 | 66   | 24.99 | 1 | 1 | 2 | 1 | 2 | 2 |
| 950 Female | 67 | 160   | 60   | 23.44 | 2 | 2 | 1 | 2 | 2 | 2 |
| 951 Female | 65 | 157   | 55.5 | 22.52 | 1 | 1 | 1 | 1 | 2 | 2 |
| 952 Female | 66 | 164   | 73.3 | 27.25 | 1 | 2 | 2 | 1 | 2 | 2 |
| 953 Female | 65 | 166.5 | 55   | 19.84 | 1 | 1 | 1 | 1 | 2 | 2 |
| 954 Female | 65 | 155.5 | 57.4 | 23.74 | 1 | 1 | 1 | 1 | 1 | 2 |
| 955 Male   | 69 | 167   | 94.1 | 33.74 | 1 | 2 | 3 | 1 | 1 | 1 |
| 956 Female | 65 | 156.5 | 78   | 31.85 | 1 | 1 | 3 | 1 | 1 | 1 |
| 957 Male   | 55 | 174.1 | 50.8 | 16.76 | 1 | 2 | 1 | 1 | 1 | 1 |
| 958 Male   | 54 | 171   | 86.5 | 29.58 | 1 | 1 | 3 | 1 | 2 | 1 |
| 959 Female | 68 | 160   | 64.8 | 25.31 | 2 | 2 | 2 | 2 | 2 | 2 |



|            |    |       |       |       |   |   |   |   |   |   |
|------------|----|-------|-------|-------|---|---|---|---|---|---|
| 960 Female | 68 | 146.5 | 72.3  | 33.69 | 2 | 1 | 3 | 1 | 2 | 2 |
| 961 Female | 76 | 148   | 52.3  | 23.88 | 1 | 1 | 1 | 1 | 1 | 2 |
| 962 Male   | 54 | 174   | 88.1  | 29.10 | 1 | 2 | 3 | 1 | 2 | 1 |
| 963 Male   | 61 | 173.5 | 72    | 23.92 | 1 | 1 | 1 | 1 | 1 | 1 |
| 964 Female | 62 | 163   | 83    | 31.24 | 1 | 1 | 3 | 1 | 1 | 2 |
| 965 Male   | 66 | 182   | 87    | 26.26 | 1 | 2 | 2 | 1 | 1 | 2 |
| 966 Male   | 52 | 171.5 | 74.3  | 25.26 | 2 | 2 | 2 | 2 | 1 | 2 |
| 967 Male   | 54 | 175.5 | 104.8 | 34.03 | 1 | 1 | 3 | 1 | 2 | 2 |
| 968 Female | 56 | 165   | 66    | 24.24 | 1 | 2 | 2 | 1 | 2 | 2 |
| 969 Male   | 57 | 167.5 | 74.5  | 26.55 | 1 | 2 | 2 | 1 | 2 | 2 |
| 970 Female | 75 | 155   | 57.5  | 23.93 | 2 | 1 | 1 | 2 | 2 | 2 |
| 971 Female | 72 | 152   | 75    | 32.46 | 1 | 1 | 3 | 1 | 1 | 2 |
| 972 Male   | 73 | 168   | 63    | 22.32 | 2 | 1 | 1 | 1 | 2 | 1 |
| 973 Female | 59 | 155   | 77    | 32.05 | 2 | 1 | 3 | 2 | 2 | 2 |
| 974 Female | 75 | 155   | 78    | 32.47 | 1 | 2 | 3 | 1 | 2 | 2 |
| 975 Male   | 80 | 174   | 82    | 27.08 | 1 | 2 | 2 | 1 | 2 | 1 |
| 976 Male   | 57 | 170   | 90    | 31.14 | 2 | 2 | 3 | 2 | 2 | 1 |
| 977 Female | 72 | 158.5 | 62    | 24.68 | 2 | 1 | 2 | 2 | 2 | 2 |
| 978 Male   | 56 | 172.5 | 75    | 25.20 | 1 | 1 | 2 | 1 | 2 | 1 |
| 979 Male   | 61 | 177   | 81    | 25.85 | 2 | 2 | 2 | 2 | 1 | 2 |
| 980 Male   | 66 | 174   | 82    | 27.08 | 2 | 2 | 2 | 2 | 2 | 1 |
| 981 Male   | 70 | 175   | 76.4  | 24.95 | 2 | 1 | 2 | 2 | 1 | 2 |
| 982 Male   | 59 | 172   | 82.6  | 27.92 | 1 | 2 | 2 | 1 | 2 | 1 |
| 983 Male   | 52 | 168.5 | 66.3  | 23.35 | 2 | 2 | 1 | 2 | 2 | 1 |
| 984 Female | 81 | 154.5 | 48.6  | 20.36 | 1 | 2 | 1 | 1 | 2 | 2 |
| 985 Male   | 52 | 180   | 78    | 24.07 | 1 | 1 | 2 | 1 | 1 | 2 |
| 986 Female | 62 | 152.5 | 72.3  | 31.09 | 1 | 1 | 3 | 1 | 2 | 2 |
| 987 Male   | 61 | 172   | 91.6  | 30.96 | 2 | 1 | 3 | 2 | 2 | 1 |
| 988 Male   | 83 | 161   | 58.3  | 22.49 | 1 | 1 | 1 | 1 | 2 | 2 |
| 989 Female | 54 | 158.5 | 57.6  | 22.93 | 1 | 2 | 1 | 1 | 2 | 2 |
| 990 Male   | 74 | 169   | 85.7  | 30.01 | 1 | 1 | 3 | 1 | 1 | 1 |
| 991 Male   | 71 | 162.2 | 92.2  | 35.05 | 1 | 1 | 3 | 1 | 1 | 1 |
| 992 Male   | 45 | 171   | 75    | 25.65 | 2 | 1 | 2 | 1 | 2 | 1 |
| 993 Male   | 74 | 175.5 | 80.2  | 26.04 | 2 | 1 | 2 | 2 | 1 | 1 |
| 994 Female | 72 | 157   | 61.5  | 24.95 | 2 | 2 | 2 | 2 | 1 | 2 |
| 995 Male   | 63 | 167.5 | 77.6  | 27.66 | 1 | 2 | 2 | 1 | 2 | 2 |
| 996 Male   | 52 | 182   | 97.4  | 29.40 | 2 | 2 | 3 | 2 | 2 | 2 |
| 997 Female | 62 | 157   | 71.5  | 29.01 | 1 | 2 | 3 | 1 | 1 | 2 |
| 998 Male   | 57 | 174   | 96.2  | 31.77 | 1 | 1 | 3 | 1 | 2 | 2 |
| 999 Female | 47 | 161.5 | 93    | 35.66 | 1 | 1 | 3 | 1 | 2 | 2 |

|             |    |       |      |       |   |   |   |   |   |   |
|-------------|----|-------|------|-------|---|---|---|---|---|---|
| 1000 Female | 78 | 148.5 | 53.8 | 24.40 | 1 | 1 | 2 | 1 | 2 | 2 |
| 1001 Male   | 63 | 173.5 | 81.9 | 27.21 | 1 | 1 | 2 | 1 | 1 | 1 |
| 1002 Male   | 55 | 180   | 96.2 | 29.69 | 1 | 2 | 3 | 1 | 1 | 1 |
| 1003 Male   | 59 | 166   | 64.1 | 23.26 | 2 | 2 | 1 | 2 | 2 | 1 |
| 1004 Male   | 50 | 190.5 | 89.8 | 24.74 | 2 | 2 | 2 | 1 | 1 | 1 |
| 1005 Female | 64 | 150   | 80.4 | 35.73 | 1 | 1 | 3 | 1 | 1 | 2 |
| 1006 Male   | 64 | 168.5 | 82.8 | 29.16 | 2 | 2 | 3 | 2 | 2 | 2 |
| 1007 Male   | 67 | 177   | 80.4 | 25.66 | 1 | 1 | 2 | 1 | 1 | 1 |
| 1008 Male   | 64 | 168   | 77   | 27.28 | 1 | 1 | 2 | 1 | 1 | 2 |
| 1009 Male   | 64 | 166   | 82   | 29.76 | 1 | 2 | 3 | 1 | 2 | 2 |
| 1010 Male   | 59 | 175   | 74   | 24.16 | 1 | 1 | 2 | 1 | 1 | 1 |
| 1011 Female | 67 | 157   | 62.4 | 25.32 | 1 | 1 | 2 | 1 | 2 | 2 |
| 1012 Female | 67 | 150   | 69   | 30.67 | 2 | 1 | 3 | 2 | 2 | 1 |
| 1013 Male   | 79 | 166   | 55.2 | 20.03 | 2 | 1 | 1 | 1 | 2 | 1 |
| 1014 Male   | 72 | 163   | 70.6 | 26.57 | 1 | 1 | 2 | 1 | 1 | 1 |
| 1015 Male   | 49 | 175.5 | 73   | 23.70 | 1 | 2 | 1 | 1 | 2 | 1 |
| 1016 Female | 67 | 157   | 72.9 | 29.58 | 1 | 2 | 3 | 1 | 2 | 2 |
| 1017 Female | 49 | 169.5 | 78.1 | 27.18 | 1 | 1 | 2 | 1 | 2 | 2 |
| 1018 Male   | 64 | 162   | 73.1 | 27.85 | 1 | 1 | 2 | 1 | 2 | 1 |
| 1019 Female | 68 | 150   | 71.6 | 31.82 | 1 | 2 | 3 | 1 | 1 | 2 |
| 1020 Male   | 51 | 179   | 92   | 28.71 | 1 | 1 | 3 | 1 | 2 | 1 |
| 1021 Male   | 48 | 167   | 85   | 30.48 | 2 | 1 | 3 | 2 | 2 | 1 |
| 1022 Male   | 64 | 170   | 78   | 26.99 | 2 | 1 | 2 | 2 | 1 | 1 |

| Number | TG   | TC   | HDL-C | LDL-C | ABI R | ABI L | PWV R | PWV L | R systolic | R diatolic | L systolic | L diatolic | Bp |
|--------|------|------|-------|-------|-------|-------|-------|-------|------------|------------|------------|------------|----|
| 1      | 1.02 | 4.74 | 1.44  | 2.86  | 1.26  | 1.28  | 1338  | 1440  | 120        | 64         | 119        | 64         |    |
| 2      | 1.55 | 3.86 | 0.78  | 2.54  | 1.45  | 1.27  | 2278  | 2301  | 155        | 80         | 150        | 70         |    |
| 3      | 1.32 | 3.78 | 1.31  | 1.75  | 1.05  | 1.08  | 1293  | 1263  | 127        | 65         | 126        | 67         |    |
| 4      | 6.29 | 3.81 | 0.45  | 1.61  | 1.1   | 1.15  | 1913  | 1971  | 132        | 67         | 133        | 66         |    |
| 5      | 1.85 | 4.89 | 1.03  | 3.2   | 1.17  | 1.21  | 1694  | 2071  | 118        | 64         | 118        | 63         |    |
| 6      | 3.97 | 3.89 | 0.88  | 2.12  | 1.04  | 1.16  | 1264  | 1181  | 109        | 72         | 115        | 75         |    |
| 7      | 2.82 | 4.02 | 0.97  | 2.19  | 1.14  | 1.22  | 1822  | 1784  | 121        | 78         | 129        | 79         |    |
| 8      | 1.24 | 3.26 | 0.78  | 2.03  | 1.05  | 1.15  | 1489  | 1492  | 140        | 81         | 144        | 81         |    |
| 9      | 2.49 | 5.4  | 1.14  | 2.95  | 1.05  | 1.02  | 1527  | 1395  | 120        | 71         | 132        | 76         |    |
| 10     | 1.33 | 5.04 | 3.28  | 3.28  | 1.14  | 1.07  | 1416  | 1446  | 95         | 61         | 91         | 50         |    |
| 11     | 1.59 | 3.15 | 0.77  | 1.86  | 1.22  | 1.11  | 1636  | 1723  | 148        | 88         | 154        | 85         |    |
| 12     | 2.41 | 3.46 | 0.8   | 2.02  | 1.2   | 1.23  | 1376  | 1434  | 133        | 83         | 125        | 84         |    |
| 13     | 3.06 | 3.86 | 1.1   | 3.02  | 1.27  | 1.24  | 1893  | 2083  | 129        | 79         | 129        | 80         |    |
| 14     | 0.89 | 5.32 | 1.8   | 3.14  | 1.17  | 1.14  | 1344  | 1329  | 113        | 70         | 113        | 66         |    |
| 15     | 2.36 | 4.46 | 1.48  | 2.47  | 1.11  | 1.1   | 1146  | 1104  | 142        | 83         | 145        | 81         |    |
| 16     | 1.91 | 3.69 | 0.79  | 1.97  | 1.18  | 1.16  | 1553  | 1505  | 154        | 76         | 152        | 76         |    |
| 17     | 1.17 | 4.78 | 1.15  | 3.52  | 1.23  | 1.19  | 1290  | 1281  | 109        | 65         | 109        | 68         |    |
| 18     | 0.55 | 3.36 | 1.31  | 1.65  | 1.13  | 1.07  | 1382  | 1536  | 114        | 61         | 110        | 59         |    |
| 19     | 1.06 | 3.98 | 1.39  | 1.86  | 1.13  | 1.14  | 1214  | 1247  | 113        | 83         | 116        | 81         |    |
| 20     | 1.04 | 4.56 | 1.16  | 2.99  | 1.28  | 1.21  | 1641  | 1747  | 115        | 59         | 115        | 59         |    |
| 21     | 2.19 | 4.5  | 0.8   | 3.07  | 1.11  | 1.08  | 1477  | 1496  | 133        | 81         | 142        | 79         |    |
| 22     | 0.99 | 4.52 | 3.32  | 3.32  | 1.28  | 1.23  | 1308  | 1327  | 137        | 71         | 136        | 74         |    |
| 23     | 3.81 | 3.65 | 0.96  | 1.81  | 1.05  | 1.03  | 1496  | 1475  | 124        | 84         | 128        | 86         |    |
| 24     | 1.06 | 3.14 | 1.86  | 1.25  | 1.18  | 1.21  | 1516  | 1602  | 136        | 83         | 130        | 80         |    |
| 25     | 1.89 | 5.58 | 1.32  | 2.78  | 1.18  | 1.17  | 1432  | 1468  | 128        | 70         | 129        | 67         |    |
| 26     | 7.6  | 6.35 | 0.83  | 3.96  | 1.15  | 1.09  | 1696  | 1805  | 143        | 71         | 133        | 70         |    |
| 27     | 4.05 | 3.54 | 0.87  | 1.97  | 1.28  | 1.22  | 1254  | 1307  | 116        | 70         | 118        | 74         |    |
| 28     | 1.96 | 5.77 | 1.06  | 4.27  | 1.24  | 1.24  | 1499  | 1467  | 122        | 80         | 122        | 81         |    |
| 29     | 1.22 | 3    | 0.82  | 1.73  | 1.14  | 1.16  | 1146  | 1151  | 144        | 82         | 141        | 80         |    |
| 30     | 1.1  | 3.61 | 1.21  | 1.96  | 1.12  | 1.13  | 1558  | 1615  | 139        | 84         | 136        | 84         |    |
| 31     | 7.47 | 4.84 | 0.71  | 1.59  | 1.06  | 1.05  | 896   | 925   | 125        | 72         | 117        | 63         |    |
| 32     | 0.69 | 2.56 | 0.96  | 1.4   | 1.24  | 1.22  | 1558  | 1823  | 126        | 62         | 121        | 59         |    |
| 33     | 1.5  | 5.15 | 1.36  | 4.16  | 1.12  | 1.08  | 1279  | 1307  | 132        | 81         | 125        | 73         |    |
| 34     | 0.95 | 3.2  | 0.78  | 2.13  | 1.08  | 1.17  | 1768  | 1753  | 133        | 76         | 125        | 78         |    |
| 35     | 1.49 | 4.52 | 1.17  | 2.75  | 1.04  | 1.06  | 1731  | 1814  | 157        | 75         | 151        | 74         |    |
| 36     | 1.48 | 4.15 | 0.95  | 2.74  | 1.17  | 1.17  | 2208  | 2257  | 138        | 66         | 137        | 65         |    |
| 37     | 2.76 | 6.23 | 0.77  | 1.46  | 0.99  | 1.01  | 1569  | 1591  | 137        | 83         | 143        | 85         |    |

|    |       |      |      |      |      |      |      |      |     |     |     |     |
|----|-------|------|------|------|------|------|------|------|-----|-----|-----|-----|
| 38 | 3.06  | 5.33 | 1.02 | 2.61 | 1.04 | 1.16 | 1509 | 1499 | 129 | 84  | 135 | 89  |
| 39 | 2.7   | 6.63 | 1.18 | 4.23 | 1.17 | 1.09 | 2129 | 2480 | 129 | 63  | 125 | 65  |
| 40 | 1.26  | 4.55 | 1.05 | 3.06 | 1.18 | 1.08 | 1269 | 1378 | 131 | 69  | 127 | 65  |
| 41 | 1.59  | 3.92 | 0.7  | 2.53 | 1.26 | 1.26 | 1759 | 1685 | 133 | 72  | 135 | 74  |
| 42 | 0.8   | 3.03 | 0.75 | 1.97 | 1.05 | 1.01 | 1735 | 1785 | 144 | 78  | 152 | 79  |
| 43 | 2.24  | 3.44 | 0.94 | 1.75 | 1.08 | 1.23 | 1591 | 1735 | 143 | 82  | 141 | 81  |
| 44 | 3.49  | 4.19 | 1.04 | 2.17 | 1.22 | 1.15 | 1583 | 1593 | 154 | 90  | 158 | 91  |
| 45 | 0.55  | 3.99 | 1.23 | 2.51 | 1.13 | 1.2  | 1657 | 1564 | 122 | 88  | 116 | 84  |
| 46 | 1.69  | 4.57 | 0.89 | 3.06 | 1.15 | 1.17 | 1646 | 1607 | 110 | 88  | 110 | 76  |
| 47 | 1.86  | 3.24 | 0.65 | 1.82 | 1.19 | 1.12 | 1094 | 1189 | 113 | 69  | 113 | 73  |
| 48 | 1.11  | 4.07 | 1.25 | 3.32 | 1.16 | 1.26 | 1305 | 1403 | 127 | 58  | 122 | 58  |
| 49 | 2.16  | 3.7  | 1.16 | 1.66 | 1.22 | 1.1  | 1801 | 1744 | 102 | 63  | 106 | 62  |
| 50 | 1.53  | 4.54 | 1    | 2.92 | 1.04 | 1.1  | 2438 | 2465 | 189 | 111 | 184 | 114 |
| 51 | 1.89  | 2.38 | 0.62 | 1.19 | 1.23 | 1.13 | 1327 | 1412 | 154 | 82  | 153 | 85  |
| 52 | 3.39  | 3.39 | 0.83 | 1.78 | 1.22 | 1.22 | 1238 | 1247 | 106 | 59  | 108 | 65  |
| 53 | 2.1   | 3.77 | 0.76 | 2.4  | 1.16 | 1.21 | 1425 | 1354 | 112 | 65  | 112 | 69  |
| 54 | 0.57  | 2.85 | 1.01 | 1.57 | 1.15 | 1.1  | 1332 | 1367 | 124 | 80  | 122 | 78  |
| 55 | 1.04  | 2.74 | 0.82 | 1.46 | 1.2  | 1.28 | 1453 | 1526 | 160 | 85  | 153 | 82  |
| 56 | 3.16  | 5.02 | 0.86 | 3.45 | 1.16 | 1.11 | 1139 | 1108 | 113 | 71  | 117 | 74  |
| 57 | 11.19 | 4.49 | 0.63 | 1.23 | 1.14 | 1.07 | 1890 | 1868 | 122 | 81  | 119 | 82  |
| 58 | 2.63  | 4.06 | 0.88 | 2.18 | 1.16 | 1.16 | 1753 | 1850 | 144 | 80  | 141 | 80  |
| 59 | 1.55  | 3.56 | 0.81 | 2.02 | 1.11 | 1.17 | 1530 | 1384 | 120 | 80  | 122 | 70  |
| 60 | 4.7   | 4.09 | 0.86 | 1.91 | 0.64 | 0.64 | 1175 | 970  | 175 | 101 | 180 | 96  |
| 61 | 0.91  | 3.89 | 1.33 | 2.05 | 0.98 | 0.98 | 1403 | 1388 | 115 | 70  | 115 | 88  |
| 62 | 2.32  | 5.85 | 0.81 | 2.93 | 1.13 | 1.05 | 1386 | 1408 | 128 | 70  | 130 | 71  |
| 63 | 0.95  | 2.98 | 0.89 | 1.83 | 1.18 | 1.1  | 1683 | 1545 | 143 | 88  | 146 | 88  |
| 64 | 2.52  | 4.21 | 0.95 | 2.01 | 1.16 | 1.19 | 2038 | 1944 | 126 | 77  | 139 | 88  |
| 65 | 1.72  | 5.62 | 0.91 | 4.02 | 1.1  | 1.14 | 1685 | 1672 | 108 | 74  | 115 | 81  |
| 66 | 1.79  | 4.5  | 1.02 | 2.79 | 1.27 | 1.2  | 1492 | 1522 | 127 | 76  | 128 | 75  |
| 67 | 1.37  | 4.26 | 1    | 2.55 | 1.05 | 1.1  | 1761 | 1744 | 147 | 74  | 137 | 83  |
| 68 | 2.99  | 3.3  | 0.67 | 1.47 | 1.18 | 1.18 | 1320 | 1264 | 103 | 55  | 106 | 68  |
| 69 | 1.28  | 4.79 | 0.77 | 3.49 | 1.2  | 1.28 | 1693 | 1715 | 128 | 87  | 125 | 87  |
| 70 | 2.01  | 2.77 | 0.62 | 1.25 | 0.92 | 1.02 | 1852 | 1814 | 119 | 59  | 111 | 60  |
| 71 | 1.14  | 3.36 | 0.97 | 1.96 | 1.2  | 1.21 | 1402 | 1396 | 121 | 80  | 121 | 81  |
| 72 | 0.89  | 5.72 | 1.59 | 3.73 | 1.07 | 1.15 | 1235 | 1281 | 122 | 69  | 122 | 68  |
| 73 | 1.93  | 3.32 | 0.78 | 2.12 | 0.96 | 0.62 | 1972 | 1978 | 124 | 97  | 130 | 78  |
| 74 | 1.92  | 3.77 | 1.02 | 2.1  | 1.17 | 1.14 | 1196 | 1250 | 106 | 75  | 108 | 77  |
| 75 | 3.06  | 4.15 | 1.06 | 1.37 | 1.19 | 1.34 | 1355 | 1375 | 118 | 72  | 122 | 71  |

|     |      |      |      |      |      |      |      |      |     |    |     |    |
|-----|------|------|------|------|------|------|------|------|-----|----|-----|----|
| 76  | 1.02 | 4.04 | 0.96 | 2.63 | 0.72 | 0.94 | 1154 | 1167 | 108 | 68 | 100 | 68 |
| 77  | 2.12 | 2.57 | 0.73 | 1.02 | 1.2  | 1.2  | 1276 | 1277 | 116 | 80 | 112 | 79 |
| 78  | 2.25 | 4.25 | 0.77 | 2.5  | 1.15 | 1.03 | 1246 | 1233 | 119 | 78 | 118 | 79 |
| 79  | 2.52 | 2.62 | 1.42 | 1.42 | 1.07 | 1.18 | 993  | 943  | 100 | 52 | 108 | 55 |
| 80  | 1.09 | 4.97 | 0.98 | 3.64 | 1.12 | 1.16 | 1717 | 1675 | 151 | 87 | 151 | 88 |
| 81  | 1.11 | 3.78 | 1.35 | 1.56 | 1.19 | 1.17 | 1431 | 1477 | 116 | 54 | 111 | 54 |
| 82  | 1.95 | 4.15 | 2.12 | 2.12 | 0.86 | 0.77 | 1470 | 1458 | 131 | 79 | 132 | 83 |
| 83  | 0.81 | 4.27 | 0.84 | 3.05 | 1.12 | 1.08 | 1661 | 1564 | 138 | 88 | 145 | 95 |
| 84  | 0.77 | 4.08 | 0.88 | 2.69 | 1.21 | 1.2  | 1384 | 1443 | 110 | 66 | 110 | 70 |
| 85  | 1.2  | 3.82 | 0.98 | 1.78 | 1.16 | 1.23 | 2194 | 2249 | 116 | 57 | 120 | 61 |
| 86  | 2.3  | 4.31 | 0.86 | 2.61 | 1.33 | 1.23 | 1329 | 1320 | 124 | 79 | 119 | 75 |
| 87  | 0.62 | 3.42 | 0.91 | 1.54 | 1.13 | 1.01 | 1423 | 1409 | 123 | 86 | 141 | 86 |
| 88  | 3.2  | 4.98 | 0.93 | 2.18 | 1.21 | 1.18 | 1468 | 1514 | 132 | 76 | 136 | 78 |
| 89  | 3.82 | 6.1  | 1.04 | 3.2  | 1.19 | 1.15 | 1664 | 1680 | 145 | 79 | 153 | 82 |
| 90  | 1.3  | 4.64 | 1.14 | 3.34 | 1.19 | 1.12 | 1400 | 1362 | 99  | 55 | 107 | 63 |
| 91  | 2.01 | 4.7  | 1.03 | 2.97 | 1.16 | 1.15 | 2370 | 2314 | 119 | 65 | 121 | 67 |
| 92  | 0.82 | 3.17 | 0.8  | 1.91 | 1.15 | 1.13 | 1289 | 1353 | 106 | 67 | 110 | 57 |
| 93  | 0.85 | 3.57 | 1.03 | 2.87 | 1.05 | 1.05 | 1421 | 1322 | 111 | 69 | 116 | 75 |
| 94  | 1.29 | 4.05 | 0.71 | 2.85 | 1.17 | 1.21 | 1813 | 1869 | 154 | 83 | 147 | 83 |
| 95  | 1.42 | 3.4  | 0.99 | 1.96 | 1.18 | 1.19 | 1436 | 1450 | 122 | 65 | 119 | 93 |
| 96  | 1.03 | 4.42 | 0.88 | 2.24 | 1.16 | 1.17 | 1345 | 1342 | 114 | 71 | 110 | 72 |
| 97  | 1.46 | 4.27 | 0.8  | 2.67 | 1.28 | 1.3  | 1407 | 1577 | 131 | 75 | 135 | 78 |
| 98  | 1.12 | 3.51 | 1    | 2.02 | 0.91 | 0.9  | 2005 | 1809 | 148 | 82 | 142 | 78 |
| 99  | 1.39 | 3.47 | 0.8  | 2.04 | 1    | 1.01 | 1603 | 1729 | 128 | 74 | 123 | 76 |
| 100 | 5.41 | 5.41 | 0.69 | 2.35 | 1.14 | 1.13 | 1248 | 1234 | 134 | 75 | 139 | 80 |
| 101 | 1.04 | 4.75 | 1.01 | 1.3  | 1.03 | 1.04 | 1409 | 1444 | 109 | 56 | 115 | 61 |
| 102 | 3.2  | 2.91 | 0.5  | 1.39 | 1.23 | 1.22 | 1472 | 1490 | 113 | 72 | 113 | 71 |
| 103 | 1.92 | 2.9  | 0.59 | 2.12 | 1.01 | 0.99 | 1184 | 1161 | 98  | 61 | 99  | 61 |
| 104 | 2.21 | 4.94 | 1.09 | 2.7  | 1.09 | 1.2  | 2002 | 1974 | 159 | 92 | 160 | 95 |
| 105 | 1.7  | 3.93 | 0.52 | 2.61 | 1.07 | 1.13 | 1652 | 1557 | 113 | 61 | 126 | 65 |
| 106 | 1.06 | 4.35 | 0.96 | 2.67 | 1.23 | 1.29 | 1692 | 1701 | 145 | 89 | 148 | 91 |
| 107 | 0.7  | 3.5  | 1.24 | 1.83 | 1.19 | 1.27 | 1544 | 1571 | 138 | 76 | 136 | 74 |
| 108 | 1.86 | 3.38 | 0.91 | 1.86 | 1.08 | 1.08 | 1561 | 1552 | 113 | 76 | 119 | 78 |
| 109 | 1.98 | 3.21 | 0.79 | 1.71 | 1.23 | 1.29 | 1771 | 1801 | 132 | 76 | 130 | 78 |
| 110 | 1.56 | 3.08 | 1.04 | 1.43 | 1.07 | 1.13 | 1703 | 1896 | 118 | 84 | 127 | 57 |
| 111 | 0.83 | 3.05 | 1.01 | 1.77 | 1.18 | 1.21 | 1969 | 2084 | 145 | 78 | 143 | 77 |
| 112 | 2.48 | 4.36 | 1.3  | 2.12 | 1.24 | 1.2  | 1718 | 1679 | 156 | 95 | 158 | 99 |
| 113 | 2.31 | 3.35 | 1.11 | 1.73 | 1.19 | 1.15 | 2246 | 2156 | 144 | 72 | 141 | 72 |

|     |      |      |      |      |      |      |      |      |     |    |     |    |
|-----|------|------|------|------|------|------|------|------|-----|----|-----|----|
| 114 | 2.27 | 3.57 | 0.8  | 1.78 | 1.14 | 1.2  | 1247 | 1282 | 129 | 84 | 131 | 78 |
| 115 | 0.69 | 3.87 | 1.28 | 2.02 | 1.19 | 1.17 | 1470 | 1516 | 123 | 65 | 122 | 67 |
| 116 | 0.87 | 3.9  | 1.48 | 2.06 | 1.15 | 1.18 | 1753 | 1795 | 122 | 64 | 123 | 58 |
| 117 | 6.82 | 5.82 | 1.46 | 2.61 | 1.19 | 1.23 | 1880 | 1881 | 124 | 71 | 122 | 73 |
| 118 | 1.88 | 5.55 | 0.84 | 3.75 | 1.13 | 1.18 | 1421 | 1489 | 118 | 74 | 118 | 75 |
| 119 | 1.22 | 3.92 | 0.67 | 2.67 | 1.14 | 1.21 | 2301 | 2405 | 144 | 82 | 142 | 85 |
| 120 | 1.76 | 4.83 | 0.95 | 3.31 | 0.98 | 0.71 | 1945 | 1151 | 155 | 89 | 158 | 84 |
| 121 | 1.04 | 2.71 | 0.75 | 1.55 | 1.09 | 1.19 | 1520 | 1745 | 122 | 72 | 137 | 80 |
| 122 | 1.52 | 4.4  | 0.95 | 2.78 | 1.03 | 1.15 | 1757 | 1669 | 110 | 63 | 106 | 62 |
| 123 | 1.17 | 4.48 | 0.88 | 3.52 | 1.14 | 1.24 | 967  | 938  | 103 | 62 | 104 | 61 |
| 124 | 1.22 | 5.35 | 1.29 | 3.59 | 1.16 | 1.15 | 1669 | 1575 | 127 | 84 | 130 | 84 |
| 125 | 4.82 | 5.53 | 1.04 | 2.3  | 1.06 | 1.02 | 1708 | 1876 | 160 | 84 | 163 | 87 |
| 126 | 1.71 | 3.88 | 0.66 | 2.57 | 1.08 | 1.1  | 1807 | 1797 | 152 | 76 | 153 | 77 |
| 127 | 1.61 | 3.94 | 0.76 | 2.38 | 1.17 | 1.25 | 1924 | 1944 | 152 | 84 | 150 | 90 |
| 128 | 1.51 | 4.28 | 0.83 | 2.82 | 1.02 | 1.08 | 1399 | 1395 | 120 | 77 | 115 | 76 |
| 129 | 0.97 | 2.53 | 0.77 | 1.75 | 1.24 | 1.23 | 1656 | 1615 | 123 | 72 | 123 | 72 |
| 130 | 1.74 | 2.81 | 0.91 | 1.48 | 1.03 | 1.08 | 1332 | 1328 | 98  | 67 | 101 | 70 |
| 131 | 1.92 | 2.45 | 0.87 | 0.99 | 1.14 | 1.1  | 1640 | 1433 | 135 | 77 | 133 | 77 |
| 132 | 1.1  | 2.95 | 0.93 | 1.55 | 1.1  | 1.13 | 1954 | 2017 | 155 | 75 | 158 | 70 |
| 133 | 2.55 | 3.83 | 0.76 | 2.03 | 1.16 | 0.96 | 1482 | 1645 | 110 | 67 | 113 | 63 |
| 134 | 2.29 | 3.83 | 1.02 | 1.78 | 1.2  | 1.19 | 2052 | 2054 | 155 | 81 | 148 | 82 |
| 135 | 2.01 | 3.71 | 0.98 | 2.05 | 1.08 | 1.18 | 1818 | 1951 | 121 | 80 | 122 | 91 |
| 136 | 1.96 | 7.18 | 0.66 | 5.41 | 1.15 | 1.19 | 1617 | 1635 | 145 | 87 | 142 | 86 |
| 137 | 1.03 | 4.26 | 1.16 | 2.74 | 1.1  | 1.09 | 1268 | 1317 | 113 | 74 | 117 | 74 |
| 138 | 1.82 | 5.07 | 0.96 | 2.21 | 0.95 | 0.88 | 2254 | 2284 | 147 | 63 | 153 | 66 |
| 139 | 1.13 | 2.69 | 0.91 | 1.28 | 1.22 | 1.17 | 1388 | 1356 | 118 | 71 | 117 | 71 |
| 140 | 1.85 | 3.97 | 1.16 | 2.19 | 1.15 | 1.17 | 1634 | 1639 | 149 | 80 | 144 | 79 |
| 141 | 1.55 | 3.2  | 0.74 | 2.09 | 1.14 | 1.15 | 1618 | 1637 | 120 | 73 | 123 | 71 |
| 142 | 2.31 | 6.33 | 0.88 | 3.25 | 1.01 | 0.99 | 1863 | 1811 | 146 | 73 | 145 | 74 |
| 143 | 1.91 | 3.44 | 0.75 | 1.93 | 1.13 | 1.16 | 1623 | 1592 | 135 | 78 | 131 | 77 |
| 144 | 0.64 | 4.7  | 1.34 | 1.91 | 0.99 | 1.04 | 1778 | 1992 | 127 | 63 | 134 | 62 |
| 145 | 1.34 | 5.04 | 1.08 | 3.5  | 0.61 | 1.08 | 575  | 1548 | 118 | 55 | 124 | 63 |
| 146 | 1.37 | 3.89 | 1.07 | 2.13 | 1.14 | 1.2  | 1580 | 1655 | 133 | 82 | 138 | 87 |
| 147 | 0.83 | 2.91 | 1.1  | 1.46 | 1.15 | 1.23 | 1790 | 1774 | 140 | 77 | 142 | 76 |
| 148 | 0.84 | 2.88 | 0.96 | 1.03 | 1.06 | 1.13 | 2261 | 2433 | 179 | 98 | 180 | 97 |
| 149 | 1.41 | 4.83 | 1.15 | 3.39 | 1.28 | 1.3  | 1849 | 2064 | 151 | 88 | 150 | 86 |
| 150 | 1.33 | 3.59 | 1.48 | 1.75 | 0.97 | 1.13 | 1359 | 1299 | 127 | 66 | 120 | 59 |
| 151 | 0.86 | 3.88 | 1    | 2.36 | 1.25 | 1.29 | 1098 | 1092 | 105 | 66 | 106 | 66 |

|     |      |      |      |      |      |      |      |      |     |    |     |    |
|-----|------|------|------|------|------|------|------|------|-----|----|-----|----|
| 152 | 0.65 | 3.66 | 1.22 | 1.86 | 0.95 | 1.16 | 1778 | 1940 | 150 | 82 | 151 | 84 |
| 153 | 2.22 | 4.85 | 0.77 | 1.72 | 1.11 | 1.09 | 2193 | 2377 | 135 | 81 | 130 | 78 |
| 154 | 4.11 | 6.49 | 0.9  | 3.53 | 1.13 | 1.12 | 1831 | 1882 | 150 | 92 | 147 | 87 |
| 155 | 3.47 | 5.1  | 0.99 | 2.83 | 1.27 | 1.2  | 1180 | 1177 | 114 | 64 | 121 | 66 |
| 156 | 1.37 | 3.4  | 1.06 | 1.83 | 1.09 | 1.1  | 1739 | 1920 | 143 | 72 | 143 | 74 |
| 157 | 1.13 | 2.77 | 0.86 | 1.47 | 1.23 | 1.21 | 1663 | 1695 | 155 | 71 | 159 | 77 |
| 158 | 3.93 | 3.93 | 1.12 | 2.35 | 1.12 | 1.09 | 1268 | 1234 | 100 | 61 | 99  | 71 |
| 159 | 1.58 | 4.07 | 0.68 | 2.96 | 1.09 | 1.01 | 1674 | 1586 | 138 | 72 | 144 | 71 |
| 160 | 0.76 | 2.31 | 0.75 | 1.27 | 1.22 | 1.17 | 1267 | 1173 | 123 | 73 | 127 | 68 |
| 161 | 1.46 | 3.2  | 0.87 | 1.9  | 1.17 | 1.19 | 1630 | 1684 | 138 | 89 | 138 | 90 |
| 162 | 2.23 | 5.44 | 1.12 | 3.59 | 0.91 | 1.11 | 1437 | 1368 | 118 | 74 | 129 | 81 |
| 163 | 1.18 | 4    | 0.77 | 2.73 | 1.13 | 1.2  | 1290 | 1372 | 127 | 72 | 126 | 74 |
| 164 | 2.13 | 5.79 | 1.19 | 3.66 | 0.83 | 1.08 | 1500 | 1626 | 168 | 87 | 168 | 88 |
| 165 | 3.27 | 3.27 | 0.91 | 2.06 | 0.93 | 0.99 | 1521 | 1554 | 134 | 76 | 131 | 75 |
| 166 | 0.53 | 2.97 | 0.88 | 1.79 | 1.06 | 1.14 | 1305 | 1201 | 114 | 68 | 119 | 73 |
| 167 | 1.1  | 3.46 | 1.14 | 2.03 | 1.23 | 1.2  | 1630 | 1642 | 132 | 71 | 129 | 70 |
| 168 | 0.74 | 2.91 | 1    | 1.43 | 1.21 | 1.2  | 1881 | 1676 | 107 | 65 | 106 | 65 |
| 169 | 0.91 | 3.58 | 0.98 | 2.33 | 1.19 | 1.11 | 1952 | 1794 | 122 | 73 | 118 | 67 |
| 170 | 1    | 3.21 | 1.11 | 1.58 | 1.14 | 1.06 | 1415 | 1359 | 125 | 68 | 119 | 66 |
| 171 | 1.82 | 3.67 | 0.79 | 2.4  | 1.21 | 1.23 | 1064 | 1054 | 101 | 61 | 103 | 61 |
| 172 | 0.8  | 2.79 | 1.1  | 1.8  | 1.08 | 1.22 | 2088 | 2119 | 132 | 79 | 137 | 81 |
| 173 | 2.11 | 4.49 | 1.02 | 2.96 | 1.07 | 1.13 | 1516 | 1532 | 136 | 81 | 125 | 74 |
| 174 | 1.78 | 3.69 | 0.06 | 2.24 | 1.13 | 1.03 | 1566 | 1780 | 124 | 68 | 135 | 73 |
| 175 | 1.87 | 3.68 | 1.06 | 2.02 | 1.09 | 1.18 | 1480 | 1466 | 143 | 76 | 150 | 75 |
| 176 | 2.39 | 3.81 | 0.83 | 2.27 | 1.12 | 1.25 | 1372 | 1395 | 172 | 82 | 193 | 86 |
| 177 | 4.86 | 6.48 | 0.98 | 3.89 | 1.16 | 1.14 | 1921 | 1881 | 153 | 92 | 151 | 96 |
| 178 | 1.69 | 4.57 | 1    | 2.68 | 1.17 | 1.23 | 1513 | 1639 | 130 | 68 | 139 | 71 |
| 179 | 1.48 | 4.5  | 1.28 | 2.59 | 1.15 | 1.11 | 1403 | 1522 | 114 | 72 | 110 | 77 |
| 180 | 1.15 | 5.43 | 1.46 | 3.55 | 1.1  | 1.12 | 1952 | 1891 | 160 | 79 | 162 | 80 |
| 181 | 2.91 | 3.5  | 0.71 | 1.56 | 1.23 | 1.19 | 1676 | 1675 | 151 | 86 | 151 | 87 |
| 182 | 5.86 | 4.4  | 0.6  | 1.13 | 1.13 | 1.2  | 1842 | 1791 | 135 | 80 | 136 | 79 |
| 183 | 1.58 | 3.85 | 0.93 | 2.05 | 1.12 | 1.1  | 2263 | 2177 | 147 | 75 | 141 | 73 |
| 184 | 4.62 | 5.64 | 0.7  | 3.25 | 0.88 | 0.96 | 1211 | 1235 | 128 | 71 | 117 | 69 |
| 185 | 2.42 | 3.08 | 0.69 | 1.81 | 1.13 | 1.12 | 1745 | 1866 | 159 | 84 | 159 | 81 |
| 186 | 0.8  | 2.47 | 0.85 | 1.16 | 1.16 | 1.21 | 1936 | 1898 | 134 | 75 | 131 | 72 |
| 187 | 1.24 | 2.92 | 0.77 | 1.86 | 0.94 | 1.03 | 1561 | 1661 | 116 | 70 | 119 | 68 |
| 188 | 1.91 | 4.64 | 0.88 | 2.69 | 1.08 | 1.23 | 1632 | 1636 | 130 | 80 | 129 | 86 |
| 189 | 1.96 | 4.32 | 0.99 | 2.55 | 1.22 | 1.19 | 1816 | 1812 | 141 | 93 | 143 | 88 |

|     |      |      |      |      |      |      |      |      |     |     |     |     |
|-----|------|------|------|------|------|------|------|------|-----|-----|-----|-----|
| 190 | 1.37 | 4.31 | 0.71 | 2.96 | 1.22 | 1.22 | 1661 | 1641 | 144 | 84  | 140 | 85  |
| 191 | 1.27 | 4.71 | 1.15 | 3.02 | 0.85 | 1.13 | 1345 | 1785 | 130 | 77  | 136 | 80  |
| 192 | 0.88 | 6.49 | 1.29 | 5.01 | 0.78 | 0.85 | 1135 | 1159 | 116 | 65  | 113 | 66  |
| 193 | 1.48 | 5.74 | 0.97 | 4.26 | 1.08 | 1.05 | 1133 | 1166 | 92  | 48  | 95  | 63  |
| 194 | 0.87 | 3.63 | 0.85 | 2.52 | 1.02 | 1.04 | 1528 | 1558 | 124 | 75  | 123 | 72  |
| 195 | 2.98 | 2.98 | 0.89 | 1.8  | 1.13 | 1.2  | 1374 | 1368 | 112 | 68  | 112 | 66  |
| 196 | 2.75 | 2.75 | 0.79 | 1.47 | 1.15 | 1.13 | 2804 | 2362 | 198 | 111 | 202 | 111 |
| 197 | 1.11 | 4.08 | 0.91 | 2.79 | 1.15 | 1.13 | 1470 | 1486 | 137 | 87  | 134 | 82  |
| 198 | 2.87 | 2.68 | 0.47 | 1.36 | 0.71 | 1.13 | 818  | 1434 | 115 | 73  | 115 | 76  |
| 199 | 0.64 | 3.77 | 1.22 | 2.37 | 1.12 | 1.19 | 1522 | 1538 | 144 | 81  | 143 | 77  |
| 200 | 1.74 | 4.14 | 0.96 | 2.62 | 1.21 | 1.28 | 1465 | 1589 | 117 | 71  | 113 | 67  |
| 201 | 1.35 | 4.25 | 0.89 | 2.57 | 1.21 | 1.25 | 1763 | 1802 | 153 | 90  | 152 | 90  |
| 202 | 1.32 | 3.13 | 0.99 | 1.59 | 1.16 | 1.23 | 1737 | 1850 | 129 | 62  | 120 | 58  |
| 203 | 1.17 | 3.38 | 0.79 | 2.14 | 1.21 | 1.19 | 1124 | 1108 | 116 | 81  | 114 | 82  |
| 204 | 0.49 | 4.04 | 1.43 | 2.23 | 1.2  | 1.22 | 1541 | 1550 | 130 | 73  | 130 | 74  |
| 205 | 4.44 | 4.44 | 1.04 | 2.78 | 1.16 | 1.17 | 1345 | 1336 | 118 | 67  | 120 | 65  |
| 206 | 0.75 | 2.77 | 0.98 | 1.56 | 1.04 | 1.17 | 1294 | 1372 | 130 | 69  | 131 | 68  |
| 207 | 0.85 | 3.89 | 1.05 | 2.45 | 1.01 | 1.07 | 2038 | 1990 | 142 | 60  | 141 | 60  |
| 208 | 1.14 | 2.97 | 0.8  | 1.91 | 1.15 | 1.15 | 1617 | 1670 | 138 | 86  | 145 | 87  |
| 209 | 1.48 | 3.98 | 0.73 | 2.71 | 1.08 | 1.17 | 1492 | 1540 | 145 | 91  | 143 | 92  |
| 210 | 1.89 | 4.58 | 1.08 | 3.02 | 1.18 | 1.14 | 1045 | 981  | 105 | 71  | 107 | 68  |
| 211 | 0.59 | 3.12 | 0.94 | 1.82 | 1.22 | 1.24 | 1881 | 1946 | 143 | 91  | 143 | 79  |
| 212 | 1.03 | 4.55 | 1.2  | 2.98 | 1.2  | 1.12 | 1304 | 1346 | 102 | 68  | 103 | 65  |
| 213 | 0.67 | 3.13 | 1.13 | 1.65 | 0.97 | 0.97 | 1366 | 1523 | 128 | 69  | 126 | 68  |
| 214 | 0.72 | 3.4  | 0.85 | 2.31 | 1.28 | 1.11 | 1993 | 1829 | 111 | 60  | 112 | 63  |
| 215 | 0.73 | 3.4  | 1.02 | 2    | 1.23 | 1.21 | 1617 | 1652 | 128 | 71  | 126 | 71  |
| 216 | 2.89 | 4.44 | 1.27 | 2.29 | 1.16 | 1.16 | 1504 | 1479 | 135 | 75  | 135 | 75  |
| 217 | 1.06 | 4.9  | 1.12 | 3.2  | 1.25 | 1.24 | 1494 | 1606 | 133 | 71  | 127 | 66  |
| 218 | 1.24 | 4.1  | 1.22 | 2.3  | 1.2  | 1.23 | 1493 | 1438 | 132 | 54  | 129 | 58  |
| 219 | 0.92 | 3.48 | 1.3  | 1.71 | 0.99 | 0.91 | 2120 | 2002 | 138 | 63  | 122 | 61  |
| 220 | 0.98 | 2.94 | 0.97 | 1.51 | 1.11 | 1.15 | 1412 | 1458 | 130 | 70  | 122 | 63  |
| 221 | 2.03 | 3.84 | 1.1  | 2.06 | 0.75 | 1.04 | 1157 | 1175 | 119 | 67  | 121 | 68  |
| 222 | 1.44 | 4.21 | 0.57 | 3.16 | 1.13 | 1.1  | 1481 | 1568 | 127 | 75  | 132 | 76  |
| 223 | 1.41 | 3.4  | 0.96 | 1.93 | 1.06 | 1.02 | 1970 | 1794 | 132 | 70  | 131 | 74  |
| 224 | 1.6  | 3.61 | 1.04 | 2.02 | 1.13 | 1.32 | 1427 | 1335 | 126 | 70  | 122 | 69  |
| 225 | 1.03 | 4    | 1.12 | 2.16 | 1.14 | 1.13 | 1297 | 1308 | 98  | 59  | 105 | 60  |
| 226 | 1.38 | 5.83 | 1.81 | 3.37 | 1.15 | 1.19 | 1532 | 1420 | 118 | 61  | 117 | 61  |
| 227 | 2.46 | 4.61 | 1.44 | 2.27 | 1.06 | 1.07 | 1938 | 1764 | 131 | 63  | 96  | 58  |



|     |      |      |      |      |      |      |      |      |     |    |     |    |
|-----|------|------|------|------|------|------|------|------|-----|----|-----|----|
| 228 | 1.76 | 4.4  | 0.88 | 2.98 | 1.08 | 1.06 | 1541 | 1537 | 157 | 87 | 156 | 89 |
| 229 | 1.35 | 4.28 | 0.93 | 3.07 | 1.03 | 1.07 | 1716 | 1769 | 144 | 70 | 137 | 68 |
| 230 | 1.26 | 2.95 | 0.75 | 2.28 | 1.17 | 1.1  | 1692 | 1860 | 132 | 67 | 131 | 66 |
| 231 | 0.64 | 2.96 | 0.96 | 1.58 | 1.12 | 1.15 | 1926 | 1927 | 130 | 87 | 128 | 86 |
| 232 | 1.78 | 3.1  | 0.79 | 1.87 | 1.18 | 1.26 | 1457 | 1477 | 109 | 67 | 107 | 63 |
| 233 | 1.64 | 5.24 | 1.15 | 2.97 | 1.12 | 1.11 | 1371 | 1406 | 123 | 79 | 119 | 78 |
| 234 | 2.85 | 3.79 | 1.3  | 1.98 | 1.16 | 1.13 | 1551 | 1428 | 111 | 63 | 113 | 63 |
| 235 | 2.04 | 4.87 | 1.18 | 2.88 | 1.18 | 1.13 | 1105 | 1049 | 120 | 65 | 118 | 62 |
| 236 | 3.72 | 5.53 | 0.9  | 3.38 | 1.13 | 1.15 | 1373 | 1351 | 120 | 75 | 115 | 70 |
| 237 | 1.14 | 3.56 | 0.95 | 2.02 | 1.11 | 1.08 | 1306 | 1291 | 99  | 61 | 101 | 59 |
| 238 | 1.13 | 3.57 | 1.05 | 1.83 | 1.15 | 1.1  | 1423 | 1442 | 134 | 89 | 133 | 91 |
| 239 | 0.73 | 4.93 | 1.17 | 3.38 | 1.23 | 1.22 | 1487 | 1496 | 115 | 78 | 113 | 79 |
| 240 | 1    | 2.56 | 0.72 | 1.35 | 1.08 | 1.03 | 2525 | 2433 | 144 | 80 | 145 | 81 |
| 241 | 2.28 | 4.76 | 0.94 | 2.92 | 1.04 | 1.04 | 1852 | 1831 | 140 | 71 | 148 | 73 |
| 242 | 2.22 | 4.27 | 0.9  | 2.5  | 1.02 | 1.04 | 1205 | 1261 | 118 | 86 | 121 | 66 |
| 243 | 1.33 | 4.4  | 0.9  | 2.81 | 0.64 | 0.7  | 1481 | 1457 | 115 | 59 | 109 | 54 |
| 244 | 2.67 | 5.85 | 0.91 | 3.31 | 1.2  | 1.13 | 1496 | 1456 | 119 | 78 | 123 | 74 |
| 245 | 0.63 | 3.57 | 1.23 | 1.92 | 1.19 | 1.22 | 1478 | 1414 | 116 | 65 | 125 | 71 |
| 246 | 3.81 | 3.4  | 1.01 | 1.03 | 1.09 | 1.1  | 1847 | 1936 | 149 | 95 | 146 | 92 |
| 247 | 0.74 | 3.09 | 0.97 | 1.86 | 1.28 | 1.27 | 1416 | 1334 | 116 | 61 | 122 | 65 |
| 248 | 1.23 | 4.1  | 1.38 | 1.64 | 1.22 | 1.15 | 1533 | 1702 | 113 | 66 | 111 | 63 |
| 249 | 1.57 | 3.17 | 0.79 | 1.54 | 1.08 | 1.07 | 1462 | 1424 | 121 | 84 | 122 | 79 |
| 250 | 0.72 | 2.9  | 0.94 | 1.5  | 1.12 | 1.1  | 1426 | 1425 | 129 | 74 | 129 | 80 |
| 251 | 2.15 | 4.11 | 1.2  | 2.03 | 1.08 | 1.1  | 1532 | 1746 | 122 | 85 | 131 | 74 |
| 252 | 3.26 | 4.74 | 0.81 | 2.86 | 1    | 0.8  | 1499 | 1320 | 122 | 73 | 124 | 75 |
| 253 | 1.77 | 3.05 | 0.82 | 1.97 | 1.13 | 1.05 | 1573 | 1626 | 126 | 75 | 125 | 77 |
| 254 | 3.95 | 5.56 | 0.72 | 3.2  | 1.15 | 1.25 | 1541 | 1518 | 125 | 84 | 133 | 88 |
| 255 | 2.1  | 5.67 | 0.88 | 3.73 | 1.08 | 1.1  | 1467 | 1418 | 128 | 84 | 129 | 87 |
| 256 | 1.1  | 4.84 | 0.9  | 3.23 | 1.02 | 1.11 | 1434 | 1519 | 130 | 71 | 132 | 72 |
| 257 | 5.49 | 5.3  | 0.82 | 2.55 | 1.26 | 1.24 | 1285 | 1260 | 123 | 78 | 118 | 75 |
| 258 | 1.13 | 3.45 | 0.78 | 2.29 | 1.1  | 1.04 | 1582 | 1516 | 117 | 70 | 119 | 70 |
| 259 | 1.29 | 3.61 | 0.79 | 2.21 | 1.17 | 1.22 | 2206 | 2166 | 138 | 76 | 138 | 78 |
| 260 | 1.82 | 2.95 | 0.87 | 1.07 | 1.05 | 1.09 | 1174 | 1210 | 104 | 67 | 101 | 61 |
| 261 | 1.09 | 4.45 | 0.08 | 3.18 | 1.28 | 1.27 | 1991 | 1994 | 146 | 77 | 141 | 72 |
| 262 | 1.17 | 4.12 | 1.08 | 2.49 | 1.14 | 1.21 | 1319 | 1303 | 119 | 74 | 125 | 75 |
| 263 | 2.27 | 4.42 | 1.02 | 2.69 | 1.09 | 1.11 | 1559 | 1484 | 140 | 84 | 138 | 77 |
| 264 | 0.67 | 2.85 | 0.78 | 3.8  | 1.11 | 0.91 | 1217 | 1365 | 91  | 55 | 92  | 61 |
| 265 | 1    | 4.06 | 0.79 | 2.73 | 1.17 | 1.07 | 1476 | 1514 | 142 | 86 | 144 | 86 |

|     |      |      |      |      |      |      |      |      |     |    |     |    |
|-----|------|------|------|------|------|------|------|------|-----|----|-----|----|
| 266 | 2.83 | 6.3  | 0.74 | 4.57 | 0.92 | 0.85 | 1660 | 1494 | 110 | 67 | 110 | 65 |
| 267 | 2.46 | 3.17 | 0.53 | 1.86 | 1.33 | 1.12 | 1195 | 947  | 108 | 62 | 106 | 62 |
| 268 | 1.27 | 4.56 | 1.35 | 2.81 | 1.17 | 1.25 | 1752 | 1640 | 135 | 87 | 136 | 85 |
| 269 | 1.36 | 3.02 | 0.94 | 1.64 | 1.16 | 1.21 | 1081 | 1077 | 116 | 64 | 115 | 66 |
| 270 | 1.99 | 3.81 | 0.93 | 2.15 | 1.08 | 1.1  | 1214 | 1191 | 114 | 72 | 125 | 73 |
| 271 | 0.72 | 4.35 | 1.04 | 2.94 | 1    | 0.97 | 2322 | 2422 | 120 | 89 | 119 | 83 |
| 272 | 2.39 | 3.74 | 0.67 | 2.41 | 0.99 | 1.08 | 1006 | 1028 | 93  | 60 | 91  | 61 |
| 273 | 4.48 | 4.48 | 1.49 | 2.72 | 1.1  | 1.12 | 2188 | 2402 | 130 | 83 | 127 | 83 |
| 274 | 2.44 | 6.86 | 1.08 | 4.42 | 0.98 | 1.01 | 1436 | 1453 | 127 | 82 | 137 | 83 |
| 275 | 2.11 | 5.39 | 0.98 | 3.64 | 1.14 | 1.19 | 1832 | 2019 | 153 | 82 | 155 | 83 |
| 276 | 0.81 | 5.92 | 1.6  | 3.76 | 1.01 | 0.98 | 1316 | 1318 | 116 | 65 | 115 | 67 |
| 277 | 1.31 | 3.82 | 0.9  | 2.51 | 1.23 | 1.2  | 1761 | 1758 | 135 | 86 | 131 | 88 |
| 278 | 2.28 | 3.68 | 1.02 | 1.94 | 1.19 | 1.19 | 1776 | 1931 | 124 | 83 | 124 | 85 |
| 279 | 2.22 | 3.33 | 0.78 | 1.91 | 1.18 | 1.17 | 1554 | 1592 | 132 | 90 | 131 | 87 |
| 280 | 0.72 | 2.63 | 0.79 | 1.46 | 1.14 | 1.13 | 1290 | 1347 | 118 | 81 | 117 | 76 |
| 281 | 1.21 | 2    | 0.82 | 1.38 | 1.35 | 1.36 | 1301 | 1283 | 125 | 75 | 125 | 70 |
| 282 | 2.22 | 4.41 | 0.65 | 2.87 | 1.08 | 1.07 | 1904 | 1645 | 100 | 70 | 125 | 73 |
| 283 | 1.39 | 2.57 | 0.71 | 1.28 | 1.22 | 1.2  | 1312 | 1374 | 118 | 73 | 117 | 73 |
| 284 | 0.88 | 2.81 | 0.92 | 1.49 | 1.08 | 1.07 | 1324 | 1281 | 105 | 67 | 110 | 67 |
| 285 | 2.12 | 7.16 | 1.26 | 5.12 | 1.07 | 1.1  | 1664 | 1677 | 118 | 65 | 114 | 62 |
| 286 | 1.03 | 3.5  | 1.2  | 1.84 | 1.06 | 0.99 | 1462 | 1411 | 138 | 77 | 130 | 71 |
| 287 | 1    | 3.93 | 1.06 | 2.4  | 1.08 | 1.03 | 1881 | 2018 | 113 | 66 | 110 | 63 |
| 288 | 1.83 | 4.6  | 0.95 | 2.93 | 1.12 | 1.14 | 1652 | 1724 | 129 | 76 | 137 | 77 |
| 289 | 1.17 | 3.5  | 0.79 | 2.35 | 1.22 | 1.15 | 1446 | 1397 | 126 | 80 | 131 | 84 |
| 290 | 0.94 | 3.35 | 1.05 | 1.85 | 1.3  | 1.24 | 1376 | 1488 | 131 | 83 | 130 | 80 |
| 291 | 2.04 | 4.93 | 1.09 | 2.79 | 1.09 | 1.16 | 1346 | 1389 | 141 | 97 | 141 | 92 |
| 292 | 1.77 | 4.6  | 1.03 | 3.06 | 1.13 | 1.27 | 1772 | 1825 | 123 | 70 | 121 | 69 |
| 293 | 2.74 | 3.51 | 1.08 | 1.67 | 1.03 | 1.03 | 1569 | 1528 | 111 | 64 | 116 | 66 |
| 294 | 1.31 | 2.97 | 0.94 | 1.65 | 1.08 | 1.14 | 2020 | 2072 | 137 | 57 | 145 | 56 |
| 295 | 0.51 | 3.86 | 1.14 | 2.38 | 1.14 | 1.2  | 1641 | 1611 | 138 | 71 | 136 | 66 |
| 296 | 0.99 | 2.25 | 0.6  | 1.17 | 1.07 | 1.11 | 1202 | 1162 | 88  | 57 | 87  | 56 |
| 297 | 2.34 | 3.75 | 0.96 | 1.96 | 1.01 | 1.09 | 1390 | 1467 | 124 | 67 | 100 | 60 |
| 298 | 0.68 | 2.6  | 0.96 | 1.45 | 1.21 | 1.18 | 1086 | 1165 | 119 | 79 | 117 | 70 |
| 299 | 2.14 | 4.2  | 0.54 | 2.65 | 1.27 | 1.22 | 1488 | 1510 | 140 | 86 | 142 | 87 |
| 300 | 1.08 | 4.3  | 1    | 2.75 | 1.21 | 1.06 | 1315 | 1310 | 127 | 72 | 112 | 66 |
| 301 | 1.96 | 4.13 | 1.06 | 2.64 | 0.98 | 1    | 1466 | 1491 | 124 | 80 | 129 | 82 |
| 302 | 0.97 | 3.4  | 1.01 | 1.94 | 1.22 | 1.15 | 1847 | 1772 | 139 | 72 | 144 | 71 |
| 303 | 3.46 | 5.09 | 1.03 | 2.15 | 1.17 | 1.18 | 1650 | 1720 | 135 | 79 | 133 | 83 |

|     |      |      |      |      |      |      |      |      |     |    |     |    |
|-----|------|------|------|------|------|------|------|------|-----|----|-----|----|
| 304 | 4.83 | 4.83 | 0.85 | 3.1  | 1.17 | 1.15 | 1178 | 1238 | 108 | 57 | 102 | 55 |
| 305 | 2.02 | 5.26 | 0.87 | 3.21 | 1.13 | 1.08 | 1101 | 1088 | 105 | 57 | 107 | 58 |
| 306 | 0.46 | 4.93 | 1.35 | 1.79 | 1.13 | 1.12 | 1414 | 1379 | 147 | 89 | 149 | 87 |
| 307 | 2.44 | 4.65 | 0.98 | 2.8  | 1.14 | 1.15 | 2051 | 1943 | 145 | 88 | 144 | 87 |
| 308 | 0.7  | 3.59 | 1.21 | 2.03 | 1.13 | 1.23 | 1400 | 1434 | 120 | 64 | 117 | 63 |
| 309 | 1.08 | 5.63 | 1.07 | 3.88 | 1.09 | 1.16 | 1281 | 1248 | 150 | 85 | 147 | 85 |
| 310 | 1.08 | 5.8  | 1.45 | 3.76 | 1.08 | 1.08 | 1662 | 1677 | 132 | 79 | 131 | 81 |
| 311 | 4    | 3.1  | 0.59 | 2.39 | 1.38 | 1.37 | 1321 | 1311 | 112 | 73 | 112 | 65 |
| 312 | 1.44 | 5.88 | 0.87 | 1.15 | 0.98 | 1.09 | 1563 | 1616 | 152 | 83 | 171 | 97 |
| 313 | 1.33 | 5.05 | 1    | 3.46 | 1.18 | 1.17 | 1930 | 1887 | 149 | 76 | 155 | 79 |
| 314 | 2.42 | 4.36 | 0.81 | 2.66 | 1.13 | 1.09 | 1825 | 1851 | 130 | 78 | 130 | 83 |
| 315 | 0.84 | 3.94 | 1.66 | 1.67 | 1.2  | 1.19 | 1969 | 2044 | 151 | 82 | 156 | 85 |
| 316 | 0.46 | 4.44 | 1.69 | 2.29 | 1.03 | 1.12 | 1740 | 1987 | 139 | 75 | 138 | 75 |
| 317 | 1.33 | 3.98 | 1.01 | 2.36 | 1.05 | 1.04 | 1508 | 1495 | 105 | 70 | 103 | 63 |
| 318 | 2.4  | 3.67 | 0.9  | 2.09 | 1.16 | 1.16 | 1664 | 1680 | 120 | 69 | 122 | 74 |
| 319 | 0.79 | 3.06 | 1.39 | 1.36 | 1.1  | 1.16 | 1839 | 2001 | 135 | 60 | 130 | 59 |
| 320 | 3.93 | 3.93 | 0.86 | 2.63 | 1.15 | 1.17 | 1403 | 1422 | 131 | 81 | 132 | 86 |
| 321 | 0.69 | 4.21 | 1.02 | 2.75 | 1.13 | 1.23 | 1239 | 1264 | 115 | 68 | 114 | 67 |
| 322 | 3.71 | 5.01 | 1.32 | 3.13 | 1.1  | 1.15 | 1274 | 1320 | 123 | 71 | 121 | 73 |
| 323 | 1.59 | 3.74 | 0.79 | 2.24 | 1.15 | 1.12 | 1479 | 1503 | 116 | 78 | 117 | 81 |
| 324 | 1.01 | 4.21 | 0.94 | 2.93 | 1.23 | 1.16 | 1394 | 1416 | 124 | 79 | 123 | 76 |
| 325 | 3.65 | 4.83 | 0.98 | 2.41 | 1.21 | 1.17 | 1400 | 1421 | 107 | 64 | 104 | 58 |
| 326 | 2.59 | 5    | 1.25 | 2.41 | 1.26 | 1.2  | 2162 | 2297 | 133 | 75 | 132 | 75 |
| 327 | 0.73 | 5.61 | 2.18 | 2.37 | 1.2  | 1.06 | 1783 | 1908 | 122 | 66 | 114 | 56 |
| 328 | 1.9  | 3.65 | 1.17 | 1.5  | 1.14 | 1.15 | 1628 | 1597 | 116 | 69 | 123 | 69 |
| 329 | 3.29 | 4.54 | 1.04 | 2.25 | 1.16 | 1.21 | 1525 | 1492 | 141 | 87 | 145 | 87 |
| 330 | 5    | 5.62 | 1.27 | 2.17 | 1.03 | 1.09 | 1242 | 1233 | 127 | 83 | 126 | 81 |
| 331 | 0.73 | 2.9  | 0.74 | 1.91 | 1.17 | 1.18 | 1478 | 1606 | 121 | 67 | 100 | 57 |
| 332 | 1.96 | 3.1  | 0.91 | 1.88 | 1.16 | 1.13 | 1485 | 1496 | 123 | 85 | 125 | 83 |
| 333 | 1.63 | 4.25 | 1.42 | 2.25 | 1.21 | 1.17 | 1277 | 1276 | 104 | 60 | 102 | 64 |
| 334 | 0.76 | 3.91 | 1.35 | 1.69 | 1.07 | 1.21 | 2825 | 2007 | 131 | 60 | 126 | 69 |
| 335 | 1.47 | 3.7  | 1.54 | 1.5  | 1.21 | 1.15 | 1465 | 1511 | 125 | 76 | 125 | 76 |
| 336 | 1.55 | 4.9  | 1.25 | 2.9  | 1.03 | 1.06 | 1669 | 1745 | 142 | 78 | 144 | 80 |
| 337 | 2.08 | 4.91 | 0.85 | 3.75 | 1.15 | 1.08 | 1708 | 1677 | 147 | 86 | 147 | 87 |
| 338 | 1.26 | 4.41 | 1.09 | 4.28 | 1.13 | 1.06 | 4398 | 2553 | 126 | 77 | 127 | 77 |
| 339 | 1.38 | 3    | 1.02 | 1.41 | 1.05 | 1.06 | 1538 | 1440 | 116 | 62 | 119 | 66 |
| 340 | 8.7  | 6.97 | 0.9  | 2.12 | 1.12 | 1.34 | 1556 | 1507 | 129 | 88 | 130 | 90 |
| 341 | 2.35 | 2.88 | 0.99 | 1.27 | 1.11 | 1.2  | 1717 | 1740 | 117 | 71 | 123 | 74 |

|     |      |      |      |      |      |      |      |      |     |    |     |    |
|-----|------|------|------|------|------|------|------|------|-----|----|-----|----|
| 342 | 1.54 | 4.31 | 2.94 | 2.94 | 1.13 | 1.04 | 1681 | 1610 | 130 | 79 | 133 | 80 |
| 343 | 5.15 | 4.32 | 0.8  | 1.57 | 0.71 | 0.75 | 1050 | 1170 | 109 | 69 | 117 | 70 |
| 344 | 1.38 | 3.33 | 0.82 | 1.96 | 1.09 | 1.12 | 1778 | 1819 | 137 | 79 | 135 | 78 |
| 345 | 1.97 | 3.67 | 1.03 | 1.92 | 1.07 | 1.09 | 1961 | 2002 | 171 | 92 | 173 | 92 |
| 346 | 2.2  | 2.97 | 0.87 | 1.87 | 1.13 | 1.06 | 1584 | 1657 | 143 | 79 | 141 | 79 |
| 347 | 2.31 | 7.48 | 1.11 | 5.02 | 1.05 | 0.96 | 2031 | 2029 | 143 | 68 | 138 | 67 |
| 348 | 0.92 | 4.82 | 1.38 | 2.97 | 1.03 | 1.03 | 1511 | 1600 | 144 | 76 | 138 | 76 |
| 349 | 1.24 | 3.02 | 0.69 | 1.75 | 1.07 | 1.11 | 1631 | 1666 | 109 | 68 | 107 | 73 |
| 350 | 1.87 | 4.37 | 0.75 | 2.8  | 1.11 | 1.13 | 1530 | 1575 | 120 | 78 | 118 | 80 |
| 351 | 5.31 | 4.89 | 0.98 | 2.03 | 1.38 | 1.4  | 1368 | 1351 | 129 | 75 | 133 | 78 |
| 352 | 0.9  | 3.28 | 0.81 | 2.24 | 1.23 | 1.23 | 1341 | 1242 | 119 | 71 | 120 | 69 |
| 353 | 5.89 | 3.33 | 0.65 | 0.9  | 1.12 | 1.1  | 1333 | 1259 | 130 | 68 | 125 | 66 |
| 354 | 3.17 | 4.64 | 0.89 | 2    | 0.99 | 1.16 | 1544 | 1735 | 132 | 63 | 138 | 64 |
| 355 | 1.48 | 4.48 | 1.14 | 2.72 | 1.2  | 1.2  | 1942 | 1962 | 138 | 74 | 139 | 75 |
| 356 | 3.17 | 3.69 | 0.84 | 1.8  | 0.88 | 0.93 | 1061 | 1040 | 115 | 70 | 125 | 78 |
| 357 | 2.96 | 3.21 | 0.63 | 1.6  | 1.09 | 1.13 | 1177 | 1123 | 121 | 71 | 120 | 73 |
| 358 | 0.83 | 3.67 | 0.9  | 2.22 | 1.14 | 1.14 | 1254 | 1235 | 116 | 65 | 119 | 66 |
| 359 | 2.67 | 3.93 | 1.09 | 2.73 | 1.09 | 1.12 | 1784 | 1786 | 118 | 79 | 123 | 79 |
| 360 | 1.11 | 3.19 | 1.04 | 1.64 | 1    | 1.04 | 1472 | 1533 | 126 | 70 | 131 | 71 |
| 361 | 1.15 | 3.58 | 0.9  | 1.91 | 0.7  | 0.81 | 1174 | 1682 | 115 | 68 | 107 | 64 |
| 362 | 2.11 | 5.32 | 1.02 | 3.15 | 1.24 | 1.25 | 1535 | 1542 | 125 | 71 | 126 | 72 |
| 363 | 1.05 | 3.94 | 1.23 | 2.22 | 1.09 | 1.08 | 1265 | 1092 | 113 | 66 | 117 | 69 |
| 364 | 1.31 | 5.77 | 1.08 | 4.01 | 1.21 | 1.23 | 1482 | 1559 | 145 | 86 | 150 | 97 |
| 365 | 0.76 | 3.53 | 1.47 | 1.54 | 1.17 | 1.25 | 1972 | 1833 | 141 | 85 | 142 | 83 |
| 366 | 0.81 | 2.82 | 1.06 | 1.63 | 1.02 | 1.14 | 1177 | 1269 | 111 | 69 | 106 | 64 |
| 367 | 1.51 | 4.65 | 0.94 | 2.91 | 1.1  | 1.14 | 1311 | 1287 | 104 | 67 | 105 | 62 |
| 368 | 1.32 | 3.27 | 0.8  | 1.94 | 0.94 | 0.96 | 1818 | 1742 | 132 | 76 | 139 | 79 |
| 369 | 1.39 | 3.04 | 0.84 | 1.55 | 1.16 | 1.09 | 1474 | 1399 | 121 | 61 | 122 | 61 |
| 370 | 2.08 | 4.07 | 0.85 | 2.43 | 1.12 | 1.13 | 1679 | 1636 | 134 | 78 | 135 | 76 |
| 371 | 1.8  | 3.84 | 1.21 | 1.98 | 1.15 | 1.24 | 1805 | 1729 | 145 | 87 | 148 | 84 |
| 372 | 1.63 | 2.45 | 0.55 | 1.23 | 1.08 | 1.05 | 1700 | 1727 | 165 | 76 | 169 | 87 |
| 373 | 1.6  | 5.28 | 1.6  | 4.05 | 1.15 | 1.08 | 1440 | 1548 | 149 | 78 | 169 | 88 |
| 374 | 0.93 | 4.96 | 1.28 | 3.11 | 1.16 | 1.15 | 2299 | 2373 | 156 | 88 | 145 | 82 |
| 375 | 2.54 | 4.9  | 0.72 | 3.02 | 1.03 | 1.04 | 1358 | 1374 | 117 | 79 | 118 | 78 |
| 376 | 1.17 | 2.49 | 0.13 | 1.32 | 1.15 | 1.07 | 1406 | 1435 | 134 | 87 | 142 | 87 |
| 377 | 1.55 | 6.6  | 0.96 | 4.68 | 1.17 | 1.09 | 1826 | 1813 | 140 | 79 | 140 | 74 |
| 378 | 0.88 | 3.05 | 1.06 | 1.58 | 1.07 | 1.21 | 1340 | 1378 | 134 | 77 | 132 | 76 |
| 379 | 0.67 | 3.6  | 0.96 | 2.17 | 1.17 | 1.1  | 2034 | 2021 | 118 | 71 | 120 | 68 |

|     |      |      |      |      |      |      |      |      |     |    |     |    |
|-----|------|------|------|------|------|------|------|------|-----|----|-----|----|
| 380 | 2.51 | 4    | 1    | 2.02 | 0.96 | 1.04 | 1913 | 1964 | 158 | 89 | 162 | 91 |
| 381 | 2.55 | 4.93 | 1.19 | 2.82 | 1.11 | 1.16 | 2015 | 1906 | 140 | 69 | 139 | 70 |
| 382 | 2.25 | 3.07 | 0.74 | 1.53 | 0.88 | 1.04 | 1359 | 1473 | 125 | 78 | 131 | 82 |
| 383 | 2.77 | 2.77 | 0.86 | 1.48 | 1.24 | 1.23 | 1557 | 1626 | 120 | 72 | 117 | 75 |
| 384 | 0.84 | 3.22 | 1    | 1.74 | 1.17 | 1.18 | 1571 | 1405 | 119 | 67 | 119 | 67 |
| 385 | 1.76 | 4.59 | 0.97 | 2.98 | 1.16 | 1.12 | 1614 | 1602 | 128 | 73 | 130 | 74 |
| 386 | 0.86 | 3.33 | 1.51 | 1.4  | 1.2  | 1.21 | 1287 | 1179 | 123 | 74 | 117 | 68 |
| 387 | 1.21 | 3.54 | 0.92 | 2.19 | 1.18 | 1.16 | 1028 | 1029 | 105 | 55 | 105 | 55 |
| 388 | 0.87 | 2.81 | 1.07 | 1.43 | 1.02 | 1.11 | 2054 | 2120 | 153 | 86 | 156 | 86 |
| 389 | 0.86 | 4.08 | 1.34 | 2.22 | 1.06 | 1.02 | 2086 | 2038 | 140 | 94 | 143 | 95 |
| 390 | 0.95 | 4.43 | 1.03 | 2.97 | 1.2  | 1.25 | 1431 | 1414 | 106 | 68 | 106 | 70 |
| 391 | 0.89 | 3.26 | 1.22 | 1.43 | 1.14 | 1.14 | 1490 | 1451 | 118 | 72 | 114 | 71 |
| 392 | 2.58 | 4.47 | 0.8  | 2.55 | 1.11 | 1.13 | 1596 | 1463 | 120 | 73 | 98  | 64 |
| 393 | 1.09 | 2.3  | 0.84 | 1.03 | 1.14 | 1.16 | 1225 | 1294 | 119 | 77 | 125 | 79 |
| 394 | 0.69 | 3.47 | 0.84 | 2.13 | 1.18 | 1.2  | 1947 | 1838 | 138 | 89 | 146 | 90 |
| 395 | 0.75 | 3.13 | 0.93 | 1.87 | 1.22 | 1.19 | 1580 | 1510 | 138 | 72 | 129 | 65 |
| 396 | 0.47 | 3.04 | 1.62 | 1.79 | 1.22 | 1.25 | 1635 | 1668 | 123 | 72 | 124 | 71 |
| 397 | 1.19 | 5.23 | 1.18 | 3.27 | 1.13 | 1.09 | 1287 | 1267 | 116 | 79 | 118 | 80 |
| 398 | 3.15 | 5.33 | 0.89 | 3.5  | 1.2  | 1.17 | 1760 | 1824 | 138 | 86 | 141 | 87 |
| 399 | 4.67 | 5.27 | 0.82 | 2.55 | 1.12 | 1.08 | 1658 | 1727 | 118 | 73 | 115 | 74 |
| 400 | 1.03 | 5.15 | 1.24 | 3.35 | 1.15 | 1.18 | 1360 | 1318 | 115 | 60 | 114 | 64 |
| 401 | 1.31 | 3.82 | 1.89 | 1.89 | 0.78 | 1.08 | 1271 | 1477 | 118 | 58 | 113 | 57 |
| 402 | 0.66 | 2.97 | 1.03 | 1.48 | 1.23 | 1.19 | 1483 | 1500 | 137 | 75 | 131 | 70 |
| 403 | 1.12 | 5.02 | 1.6  | 2.86 | 1.16 | 1.17 | 1194 | 1231 | 126 | 68 | 124 | 67 |
| 404 | 0.89 | 3.09 | 1.19 | 1.39 | 1.03 | 1.03 | 1693 | 1513 | 121 | 63 | 116 | 62 |
| 405 | 1.44 | 3.31 | 0.8  | 1.5  | 1.14 | 1.1  | 1560 | 1661 | 153 | 91 | 154 | 92 |
| 406 | 3.92 | 5.07 | 0.93 | 2.72 | 1.26 | 1.28 | 1631 | 1624 | 137 | 84 | 140 | 85 |
| 407 | 1.88 | 3.57 | 0.65 | 2.15 | 1.2  | 1.14 | 1651 | 1587 | 140 | 72 | 138 | 71 |
| 408 | 0.81 | 2.81 | 0.95 | 1.46 | 1.17 | 1.12 | 1022 | 1019 | 89  | 52 | 89  | 56 |
| 409 | 0.66 | 2.47 | 1.05 | 1.08 | 1.07 | 1.19 | 2197 | 2192 | 132 | 78 | 134 | 78 |
| 410 | 1.83 | 2.62 | 0.59 | 1.52 | 1.15 | 1.18 | 1301 | 1231 | 114 | 72 | 112 | 71 |
| 411 | 0.89 | 1.58 | 0.82 | 2.41 | 1.27 | 1.17 | 1441 | 1515 | 113 | 73 | 114 | 69 |
| 412 | 0.7  | 2.83 | 0.75 | 1.76 | 0.98 | 0.87 | 1241 | 1283 | 131 | 71 | 127 | 72 |
| 413 | 1.25 | 3.99 | 0.88 | 2.68 | 1.06 | 1.18 | 1317 | 1283 | 120 | 77 | 118 | 75 |
| 414 | 1.14 | 2.47 | 0.98 | 1.05 | 1.11 | 1.07 | 1605 | 1560 | 125 | 60 | 123 | 61 |
| 415 | 1.51 | 4.11 | 0.88 | 2.6  | 1.21 | 1.23 | 1417 | 1389 | 124 | 66 | 123 | 63 |
| 416 | 1.22 | 4.08 | 0.88 | 0.88 | 0.91 | 1.07 | 1375 | 1334 | 135 | 81 | 136 | 77 |
| 417 | 1.51 | 4.83 | 1.11 | 3.16 | 1.22 | 1.23 | 2015 | 2010 | 136 | 77 | 132 | 74 |

|     |      |       |      |      |      |      |      |      |     |     |     |     |
|-----|------|-------|------|------|------|------|------|------|-----|-----|-----|-----|
| 418 | 1    | 3.55  | 0.62 | 1.8  | 1.23 | 1.22 | 1927 | 1857 | 147 | 87  | 148 | 89  |
| 419 | 1.09 | 2.9   | 0.91 | 1.58 | 1.2  | 1.15 | 1214 | 1126 | 105 | 63  | 105 | 63  |
| 420 | 0.71 | 2.89  | 0.94 | 1.59 | 1.23 | 1.3  | 2128 | 2136 | 148 | 85  | 140 | 82  |
| 421 | 2.33 | 4.95  | 1.3  | 2.05 | 1.28 | 1.29 | 1605 | 1745 | 139 | 73  | 134 | 71  |
| 422 | 4.65 | 10.95 | 0.73 | 2.65 | 0.9  | 0.98 | 1842 | 1819 | 199 | 109 | 192 | 106 |
| 423 | 0.73 | 2.61  | 0.79 | 1.39 | 1.3  | 1.27 | 1510 | 1556 | 143 | 85  | 142 | 80  |
| 424 | 1.4  | 3.56  | 0.98 | 2.09 | 0.89 | 1.02 | 1188 | 1402 | 143 | 73  | 152 | 72  |
| 425 | 1.04 | 2.61  | 0.91 | 1.39 | 1.13 | 1.07 | 2334 | 2386 | 139 | 97  | 135 | 95  |
| 426 | 2.53 | 6.43  | 1.29 | 3.64 | 1.06 | 1.05 | 1573 | 1574 | 139 | 85  | 135 | 81  |
| 427 | 8.09 | 3.92  | 0.64 | 1.67 | 1.27 | 1.33 | 1362 | 1411 | 107 | 71  | 109 | 72  |
| 428 | 1.48 | 3.96  | 0.95 | 2.42 | 1.22 | 1.21 | 1488 | 1493 | 122 | 64  | 125 | 64  |
| 429 | 1.59 | 4.54  | 0.91 | 2.85 | 1.2  | 1.14 | 1234 | 1219 | 92  | 54  | 90  | 52  |
| 430 | 2.04 | 2.47  | 0.5  | 1.16 | 0.85 | 0.93 | 1758 | 1715 | 147 | 77  | 138 | 75  |
| 431 | 0.88 | 3.07  | 1.01 | 1.67 | 1.11 | 1.06 | 1448 | 1457 | 130 | 73  | 131 | 74  |
| 432 | 0.48 | 4.37  | 1.64 | 2.4  | 1.21 | 1.17 | 1850 | 1914 | 136 | 74  | 131 | 71  |
| 433 | 0.97 | 4.33  | 0.98 | 2.96 | 1.26 | 1.06 | 1859 | 1892 | 131 | 79  | 129 | 78  |
| 434 | 2.31 | 4.17  | 1.2  | 2.18 | 1.18 | 1.19 | 1443 | 1462 | 105 | 67  | 106 | 70  |
| 435 | 0.89 | 3.07  | 0.96 | 1.72 | 1.16 | 1.11 | 1210 | 1179 | 114 | 80  | 114 | 77  |
| 436 | 4.31 | 3.53  | 0.62 | 1.5  | 0.91 | 1.06 | 1520 | 1866 | 150 | 79  | 154 | 82  |
| 437 | 2.72 | 4.9   | 0.91 | 2.28 | 1.13 | 1.1  | 1196 | 1161 | 122 | 69  | 118 | 69  |
| 438 | 1.22 | 3.57  | 0.83 | 2.39 | 1.04 | 0.97 | 1210 | 1234 | 114 | 67  | 113 | 67  |
| 439 | 0.94 | 3.4   | 1.33 | 1.63 | 1.22 | 1.27 | 1672 | 1609 | 150 | 97  | 150 | 98  |
| 440 | 0.81 | 3.17  | 1.18 | 1.41 | 0.95 | 1    | 2260 | 2157 | 183 | 89  | 173 | 83  |
| 441 | 1.72 | 3.99  | 0.6  | 2.53 | 1.01 | 0.9  | 1205 | 1126 | 126 | 72  | 128 | 74  |
| 442 | 1.1  | 4.59  | 1.02 | 3.22 | 1.18 | 1.18 | 1684 | 1650 | 129 | 77  | 131 | 74  |
| 443 | 0.66 | 4.76  | 1.35 | 3.02 | 1.09 | 1.3  | 2187 | 2038 | 116 | 66  | 114 | 60  |
| 444 | 1.58 | 6.1   | 1.29 | 3.59 | 1.14 | 1.11 | 2645 | 2864 | 154 | 73  | 159 | 74  |
| 445 | 1.17 | 2.57  | 0.88 | 1.15 | 0.89 | 0.9  | 2104 | 1808 | 134 | 72  | 134 | 72  |
| 446 | 4.22 | 3.76  | 0.61 | 1.33 | 0.73 | 0.98 | 1371 | 1403 | 133 | 73  | 132 | 74  |
| 447 | 1.54 | 2.42  | 0.93 | 1.02 | 1.21 | 1.15 | 1323 | 1293 | 107 | 60  | 113 | 69  |
| 448 | 1.5  | 4.93  | 1.31 | 3.05 | 1.11 | 1.11 | 1605 | 1580 | 128 | 66  | 129 | 61  |
| 449 | 3.23 | 4.62  | 0.74 | 2.25 | 1.01 | 1.15 | 1829 | 1713 | 111 | 65  | 115 | 65  |
| 450 | 3.04 | 3.03  | 0.66 | 1.4  | 1.12 | 1.12 | 1426 | 1435 | 129 | 74  | 130 | 75  |
| 451 | 0.9  | 5.36  | 1.93 | 2.99 | 1.1  | 1.06 | 1321 | 1387 | 108 | 61  | 115 | 66  |
| 452 | 1.93 | 6.63  | 1.43 | 4.42 | 1.15 | 1    | 1583 | 1523 | 137 | 85  | 143 | 86  |
| 453 | 0.97 | 5.41  | 1.94 | 3.87 | 1.23 | 1.19 | 1286 | 1307 | 124 | 69  | 125 | 70  |
| 454 | 0.99 | 5.3   | 1.13 | 1.75 | 1.09 | 1.13 | 1473 | 1562 | 123 | 67  | 127 | 66  |
| 455 | 1.1  | 3.32  | 1.33 | 1.55 | 1.01 | 1.12 | 1590 | 1593 | 127 | 82  | 129 | 78  |

|     |      |      |      |      |      |      |      |      |     |    |     |    |
|-----|------|------|------|------|------|------|------|------|-----|----|-----|----|
| 456 | 1.45 | 4.22 | 0.87 | 2.74 | 1.02 | 1.04 | 1583 | 1638 | 131 | 77 | 135 | 79 |
| 457 | 2.54 | 3.83 | 0.82 | 1.82 | 1.27 | 1.19 | 1356 | 1344 | 132 | 80 | 131 | 80 |
| 458 | 1.33 | 2.64 | 0.82 | 1.35 | 1.1  | 1.14 | 1658 | 1649 | 149 | 86 | 145 | 81 |
| 459 | 1.23 | 4.27 | 0.74 | 3.01 | 1.18 | 1.14 | 1589 | 1555 | 138 | 72 | 136 | 74 |
| 460 | 2.36 | 4.24 | 0.69 | 2.49 | 1.14 | 1.18 | 1697 | 1642 | 112 | 68 | 110 | 72 |
| 461 | 0.85 | 4.96 | 1.33 | 3.23 | 1.05 | 1.1  | 1403 | 1298 | 122 | 69 | 124 | 76 |
| 462 | 1.82 | 5.87 | 1.26 | 3.75 | 1.07 | 1.11 | 1512 | 1614 | 134 | 78 | 131 | 77 |
| 463 | 1.2  | 3.2  | 0.96 | 2.01 | 1.21 | 1.21 | 1367 | 1371 | 127 | 79 | 131 | 82 |
| 464 | 2.9  | 2.9  | 0.94 | 1.36 | 1.2  | 1.19 | 1514 | 1587 | 123 | 80 | 121 | 77 |
| 465 | 0.89 | 2.58 | 0.83 | 1.35 | 1.21 | 1.2  | 1815 | 1791 | 127 | 72 | 128 | 73 |
| 466 | 0.77 | 4.51 | 1.35 | 2.75 | 1.16 | 1.17 | 1686 | 1653 | 120 | 71 | 120 | 73 |
| 467 | 1.01 | 3.42 | 0.9  | 2.14 | 1.19 | 1.21 | 1278 | 1259 | 126 | 72 | 124 | 72 |
| 468 | 0.72 | 4.03 | 1.22 | 2.32 | 1.21 | 1.21 | 1252 | 1262 | 117 | 64 | 121 | 66 |
| 469 | 0.6  | 3.96 | 1.31 | 2.31 | 1.18 | 1.15 | 1778 | 1803 | 130 | 81 | 130 | 81 |
| 470 | 1.81 | 3.81 | 0.91 | 2.35 | 0.83 | 0.93 | 1620 | 1756 | 123 | 68 | 116 | 68 |
| 471 | 0.54 | 4.1  | 1.83 | 1.84 | 1.11 | 1.11 | 1530 | 1570 | 120 | 67 | 113 | 60 |
| 472 | 3.19 | 5.66 | 0.91 | 3.21 | 1.12 | 1.12 | 1678 | 1600 | 154 | 89 | 154 | 89 |
| 473 | 1.29 | 3.36 | 0.69 | 2.27 | 0.81 | 1.15 | 1538 | 1547 | 122 | 67 | 127 | 64 |
| 474 | 1.39 | 5.43 | 1.02 | 2.63 | 1.11 | 1.13 | 1286 | 1242 | 120 | 69 | 119 | 67 |
| 475 | 1.3  | 4.81 | 1.32 | 3.04 | 1.05 | 1.06 | 1196 | 1193 | 104 | 62 | 99  | 55 |
| 476 | 0.74 | 5.2  | 1.16 | 3.36 | 1.09 | 1.09 | 1826 | 1763 | 135 | 78 | 137 | 77 |
| 477 | 2.09 | 3.67 | 0.77 | 2.01 | 1.13 | 1.1  | 1545 | 1535 | 118 | 70 | 119 | 71 |
| 478 | 1.5  | 3.45 | 1.28 | 1.61 | 1.01 | 1.09 | 1669 | 1887 | 130 | 65 | 118 | 56 |
| 479 | 3.91 | 3.78 | 0.58 | 1.47 | 1.05 | 1.04 | 1368 | 1400 | 128 | 79 | 132 | 83 |
| 480 | 1.37 | 3.2  | 0.82 | 1.77 | 1.27 | 1.18 | 1398 | 1471 | 137 | 98 | 124 | 97 |
| 481 | 1.27 | 4.87 | 0.87 | 3.11 | 1.05 | 1.11 | 1665 | 1643 | 128 | 65 | 140 | 76 |
| 482 | 1.81 | 5.39 | 0.92 | 3.35 | 1.22 | 1.2  | 1378 | 1448 | 120 | 80 | 115 | 79 |
| 483 | 3.61 | 1.12 | 0.58 | 2.31 | 1.07 | 1    | 1507 | 1554 | 119 | 68 | 117 | 68 |
| 484 | 0.69 | 2.54 | 0.93 | 1.31 | 1.01 | 0.91 | 1456 | 1488 | 111 | 63 | 92  | 64 |
| 485 | 1.05 | 2.86 | 1.29 | 1.3  | 1.09 | 1.17 | 1832 | 1792 | 133 | 72 | 128 | 69 |
| 486 | 0.61 | 2.73 | 0.86 | 1.53 | 1.18 | 1.17 | 1085 | 1034 | 107 | 68 | 107 | 69 |
| 487 | 0.97 | 4.89 | 1.23 | 2.93 | 1.12 | 1.14 | 1365 | 1400 | 112 | 58 | 111 | 54 |
| 488 | 1.29 | 3.03 | 1.54 | 1.14 | 1.27 | 1.12 | 1357 | 1390 | 116 | 71 | 113 | 70 |
| 489 | 2.14 | 4.15 | 0.72 | 2.8  | 1.05 | 1.01 | 1277 | 1264 | 126 | 75 | 128 | 85 |
| 490 | 3.07 | 4.81 | 0.88 | 2.62 | 1.16 | 1.19 | 1321 | 1301 | 118 | 65 | 116 | 63 |
| 491 | 0.66 | 5.82 | 1.71 | 3.56 | 1.19 | 1.33 | 1420 | 1455 | 124 | 74 | 126 | 74 |
| 492 | 1.28 | 4.61 | 0.92 | 3.31 | 1.06 | 1.17 | 1077 | 1092 | 110 | 70 | 116 | 73 |
| 493 | 3.55 | 4    | 1.13 | 1.66 | 1.16 | 1.14 | 1682 | 1731 | 130 | 78 | 134 | 82 |

|     |       |      |      |      |      |      |      |      |     |     |     |    |
|-----|-------|------|------|------|------|------|------|------|-----|-----|-----|----|
| 494 | 1.85  | 5.18 | 1.13 | 3.14 | 1.2  | 1.2  | 1814 | 1904 | 132 | 72  | 130 | 68 |
| 495 | 1.12  | 4.32 | 1.59 | 2.27 | 1.18 | 1.29 | 1536 | 1503 | 121 | 68  | 114 | 69 |
| 496 | 2.17  | 4.33 | 0.83 | 2.79 | 1    | 1.07 | 1213 | 1217 | 110 | 68  | 113 | 65 |
| 497 | 0.95  | 4.97 | 1.24 | 3.21 | 1.03 | 1.04 | 1470 | 1442 | 140 | 69  | 144 | 70 |
| 498 | 2.34  | 4.12 | 1.06 | 2.34 | 1.17 | 1.2  | 1837 | 1750 | 138 | 72  | 138 | 74 |
| 499 | 0.96  | 4.16 | 1.18 | 2.5  | 1.04 | 1.09 | 1910 | 1998 | 169 | 100 | 162 | 93 |
| 500 | 1.46  | 5.19 | 1.19 | 3.47 | 1.2  | 1.29 | 1217 | 1174 | 118 | 89  | 120 | 77 |
| 501 | 3.29  | 4.63 | 0.85 | 2.46 | 1.15 | 1.15 | 1415 | 1455 | 136 | 78  | 130 | 78 |
| 502 | 1.67  | 4.09 | 0.73 | 2.72 | 1.21 | 1.23 | 1251 | 1262 | 112 | 67  | 110 | 68 |
| 503 | 1.3   | 5.75 | 1.29 | 3.75 | 1.17 | 1.16 | 1350 | 1297 | 103 | 61  | 101 | 60 |
| 504 | 1.11  | 3.89 | 1.36 | 1.94 | 1.11 | 1.23 | 1277 | 1260 | 107 | 70  | 104 | 68 |
| 505 | 1.24  | 3.72 | 0.79 | 2.51 | 1.15 | 1.23 | 1340 | 1319 | 100 | 66  | 102 | 64 |
| 506 | 1.42  | 5.61 | 1.17 | 3.73 | 1.17 | 1.21 | 1349 | 1394 | 113 | 66  | 117 | 69 |
| 507 | 1.16  | 4.86 | 1.34 | 2.94 | 1.11 | 1.15 | 1624 | 1592 | 114 | 60  | 111 | 61 |
| 508 | 1.62  | 4.39 | 1.2  | 2.73 | 1.1  | 1.1  | 1350 | 1321 | 124 | 81  | 121 | 77 |
| 509 | 2     | 4.25 | 0.9  | 2.46 | 1.25 | 1.24 | 1827 | 1900 | 137 | 80  | 144 | 86 |
| 510 | 2.03  | 2.55 | 0.68 | 1.06 | 1.06 | 1.07 | 1284 | 1288 | 124 | 78  | 121 | 78 |
| 511 | 1.45  | 2.49 | 1.09 | 0.95 | 1.16 | 1.2  | 1771 | 1791 | 133 | 79  | 134 | 77 |
| 512 | 1.6   | 7.7  | 1.01 | 3.25 | 1.05 | 1.07 | 1305 | 1297 | 122 | 80  | 120 | 77 |
| 513 | 1.81  | 4.9  | 1.16 | 3.27 | 1.06 | 1.27 | 1845 | 1918 | 140 | 87  | 139 | 86 |
| 514 | 1.81  | 5.52 | 0.95 | 3.5  | 0.82 | 0.82 | 1845 | 1797 | 164 | 79  | 157 | 72 |
| 515 | 4.24  | 5.3  | 0.89 | 2.39 | 1.12 | 1.06 | 1427 | 1465 | 118 | 67  | 120 | 67 |
| 516 | 0.74  | 3.31 | 0.87 | 1.91 | 1.18 | 1.17 | 1334 | 1330 | 125 | 82  | 123 | 82 |
| 517 | 3     | 3.8  | 0.65 | 2.34 | 1.17 | 1.46 | 1282 | 1361 | 125 | 72  | 126 | 75 |
| 518 | 0.68  | 3.37 | 0.83 | 3.44 | 1.19 | 1.15 | 1541 | 1538 | 127 | 71  | 129 | 70 |
| 519 | 1.77  | 4.1  | 0.92 | 2.41 | 1.14 | 1.09 | 1840 | 1945 | 134 | 67  | 134 | 71 |
| 520 | 1.97  | 3.89 | 0.97 | 2.2  | 0.94 | 1.09 | 1648 | 1637 | 139 | 82  | 136 | 86 |
| 521 | 1.29  | 4.7  | 0.99 | 3.09 | 1.12 | 1.06 | 1721 | 1737 | 146 | 93  | 146 | 98 |
| 522 | 0.9   | 2.72 | 0.84 | 1.52 | 1.22 | 1.23 | 1393 | 1419 | 134 | 74  | 131 | 76 |
| 523 | 5.05  | 3.89 | 0.52 | 1.93 | 1.06 | 1.1  | 1337 | 1346 | 110 | 77  | 111 | 76 |
| 524 | 2.47  | 4.08 | 0.74 | 2.31 | 1.08 | 1.19 | 1720 | 1793 | 145 | 80  | 148 | 83 |
| 525 | 1.3   | 3.5  | 0.99 | 1.98 | 1.1  | 1.11 | 1565 | 1562 | 124 | 77  | 122 | 78 |
| 526 | 1.2   | 3.82 | 0.89 | 2.32 | 1.33 | 1.21 | 1023 | 1011 | 98  | 52  | 98  | 55 |
| 527 | 1.83  | 6.58 | 1.24 | 3.56 | 1.08 | 1.05 | 1295 | 1361 | 123 | 67  | 130 | 70 |
| 528 | 1.07  | 4.12 | 1.08 | 2.43 | 1.27 | 1.23 | 1789 | 1775 | 144 | 72  | 138 | 81 |
| 529 | 1.88  | 3.76 | 0.84 | 2.06 | 1.24 | 1.24 | 1051 | 1055 | 110 | 56  | 106 | 57 |
| 530 | 1.09  | 3.69 | 1.03 | 2.07 | 1.25 | 1.19 | 1617 | 1590 | 116 | 64  | 124 | 67 |
| 531 | 19.22 | 9.95 | 0.61 | 1.52 | 1.21 | 1.08 | 1295 | 1322 | 131 | 79  | 123 | 79 |



|     |      |      |      |      |      |      |      |      |     |    |     |     |
|-----|------|------|------|------|------|------|------|------|-----|----|-----|-----|
| 532 | 0.5  | 3.1  | 1.27 | 1.5  | 1.23 | 1.2  | 1530 | 1496 | 122 | 76 | 122 | 76  |
| 533 | 1.34 | 3.31 | 1.01 | 1.83 | 1.15 | 1.11 | 1941 | 1979 | 125 | 69 | 131 | 73  |
| 534 | 0.75 | 2.06 | 0.55 | 1.18 | 0.97 | 1.05 | 1762 | 1717 | 107 | 62 | 102 | 62  |
| 535 | 1.51 | 4.11 | 1.2  | 2.13 | 1.31 | 1.19 | 1277 | 1255 | 107 | 62 | 107 | 60  |
| 536 | 0.89 | 2.83 | 0.76 | 1.61 | 1    | 1.05 | 2415 | 2335 | 157 | 92 | 149 | 101 |
| 537 | 1.14 | 3.21 | 1.06 | 1.6  | 1.12 | 1.11 | 1609 | 1602 | 134 | 75 | 131 | 76  |
| 538 | 0.66 | 3.73 | 1.5  | 1.87 | 1.26 | 1.2  | 1395 | 1486 | 114 | 61 | 120 | 58  |
| 539 | 2.06 | 3.72 | 1.03 | 1.95 | 1.07 | 1.17 | 1400 | 1436 | 125 | 79 | 123 | 71  |
| 540 | 0.65 | 5.71 | 0.86 | 3.4  | 1.12 | 1.15 | 1604 | 1701 | 137 | 82 | 133 | 81  |
| 541 | 2.11 | 5.56 | 1.1  | 3.71 | 1.15 | 1.13 | 1965 | 2194 | 139 | 68 | 132 | 67  |
| 542 | 2.35 | 4.76 | 0.86 | 3.01 | 0.96 | 0.94 | 1405 | 1425 | 106 | 73 | 99  | 62  |
| 543 | 0.94 | 2.86 | 1.04 | 1.35 | 0.59 | 0.64 | 1614 | 1420 | 120 | 55 | 116 | 55  |
| 544 | 1    | 3    | 0.97 | 1.64 | 1.09 | 1.18 | 1367 | 1353 | 143 | 86 | 149 | 88  |
| 545 | 2.29 | 3.79 | 0.86 | 1.32 | 1.12 | 1.13 | 1430 | 1533 | 148 | 92 | 143 | 90  |
| 546 | 1.63 | 2.75 | 0.84 | 1.3  | 1.08 | 1.05 | 2166 | 2309 | 123 | 78 | 128 | 79  |
| 547 | 2.24 | 4.76 | 0.7  | 3.1  | 1.19 | 1.15 | 1638 | 1628 | 101 | 65 | 132 | 76  |
| 548 | 0.45 | 2.87 | 0.94 | 1.64 | 1.09 | 1.18 | 1557 | 1602 | 141 | 70 | 139 | 70  |
| 549 | 1.53 | 4.81 | 0.96 | 2.83 | 1.12 | 1.12 | 1563 | 1613 | 128 | 67 | 129 | 70  |
| 550 | 2.08 | 4.68 | 0.82 | 2.89 | 0.96 | 1.01 | 2205 | 2009 | 164 | 75 | 144 | 78  |
| 551 | 0.89 | 3.44 | 1.34 | 1.83 | 1.02 | 1.06 | 1417 | 1420 | 118 | 67 | 119 | 51  |
| 552 | 0.78 | 3.03 | 1.11 | 1.58 | 1.12 | 1.1  | 1958 | 2032 | 151 | 83 | 153 | 88  |
| 553 | 1.65 | 4.25 | 0.84 | 2.75 | 1.08 | 1.11 | 1947 | 1854 | 127 | 78 | 131 | 80  |
| 554 | 1.68 | 4.52 | 1.21 | 2.47 | 1.1  | 1.04 | 1468 | 1436 | 130 | 89 | 136 | 95  |
| 555 | 1.79 | 4.52 | 0.75 | 2.91 | 1.12 | 1.16 | 1308 | 1312 | 136 | 57 | 136 | 55  |
| 556 | 1.62 | 3.32 | 0.7  | 1.8  | 1.13 | 1.11 | 1879 | 1748 | 134 | 73 | 132 | 70  |
| 557 | 0.65 | 2.79 | 1.34 | 1.06 | 1.22 | 1.26 | 1568 | 1634 | 115 | 70 | 116 | 67  |
| 558 | 1.64 | 5.95 | 1.38 | 3.69 | 1.11 | 1.05 | 1823 | 1828 | 135 | 82 | 141 | 87  |
| 559 | 7.48 | 7.47 | 0.92 | 2.87 | 1.08 | 1.03 | 1523 | 1639 | 149 | 87 | 151 | 85  |
| 560 | 1.8  | 4.64 | 0.79 | 3    | 1.15 | 1.13 | 1457 | 1510 | 140 | 94 | 138 | 93  |
| 561 | 6.96 | 4.54 | 0.76 | 1.83 | 1.27 | 1.24 | 1430 | 1442 | 132 | 85 | 141 | 89  |
| 562 | 1.21 | 4.66 | 0.31 | 3.46 | 0.98 | 1    | 1399 | 1448 | 128 | 77 | 117 | 77  |
| 563 | 4.07 | 5.03 | 2.8  | 2.8  | 0.97 | 1.05 | 1628 | 1620 | 147 | 79 | 146 | 79  |
| 564 | 1.08 | 3.37 | 1.07 | 2.16 | 0.91 | 1.01 | 949  | 968  | 70  | 51 | 82  | 44  |
| 565 | 1.81 | 3.07 | 0.63 | 1.71 | 0.66 | 0.56 | 2165 | 1242 | 119 | 56 | 98  | 49  |
| 566 | 0.82 | 3.48 | 1.13 | 1.87 | 1.05 | 1.03 | 1583 | 1585 | 121 | 71 | 117 | 67  |
| 567 | 1.18 | 2.48 | 0.91 | 0.89 | 1.28 | 1.21 | 1133 | 1164 | 121 | 64 | 120 | 65  |
| 568 | 2.9  | 4.62 | 0.89 | 2.81 | 1.15 | 1.15 | 1680 | 1621 | 135 | 83 | 138 | 84  |
| 569 | 0.84 | 1.11 | 1    | 1.98 | 1.03 | 0.97 | 1798 | 1532 | 149 | 82 | 141 | 80  |

|     |      |      |      |      |      |      |      |      |     |    |     |    |
|-----|------|------|------|------|------|------|------|------|-----|----|-----|----|
| 570 | 1.06 | 2.87 | 1.01 | 1.5  | 1.25 | 1.17 | 1582 | 1588 | 131 | 74 | 130 | 72 |
| 571 | 1.16 | 4.66 | 1.01 | 0.92 | 1.12 | 1.14 | 1814 | 1783 | 122 | 65 | 144 | 81 |
| 572 | 1.41 | 4.11 | 1.06 | 2.6  | 1.15 | 1.12 | 1638 | 1652 | 129 | 78 | 136 | 85 |
| 573 | 0.99 | 2.68 | 0.69 | 1.5  | 1.32 | 1.02 | 2081 | 2037 | 124 | 76 | 127 | 81 |
| 574 | 2.46 | 4.67 | 1.3  | 3.15 | 1.24 | 1.22 | 1739 | 1779 | 133 | 69 | 136 | 74 |
| 575 | 2.55 | 3.61 | 1.11 | 1.63 | 1.13 | 1.13 | 1657 | 1636 | 114 | 60 | 116 | 63 |
| 576 | 1.69 | 3.45 | 1.04 | 1.76 | 1.09 | 1.14 | 1373 | 1427 | 123 | 66 | 132 | 74 |
| 577 | 1.11 | 3.4  | 1.27 | 1.68 | 1.07 | 1.13 | 2093 | 2487 | 138 | 69 | 131 | 64 |
| 578 | 1.57 | 3.87 | 0.86 | 2.24 | 1.16 | 1.28 | 1568 | 1591 | 124 | 70 | 125 | 71 |
| 579 | 1.94 | 5.64 | 0.95 | 3.69 | 0.97 | 0.95 | 1305 | 1267 | 118 | 69 | 119 | 72 |
| 580 | 2.33 | 3.74 | 0.8  | 1.98 | 1.17 | 1.21 | 1607 | 1594 | 122 | 67 | 125 | 70 |
| 581 | 1.13 | 3.69 | 1.49 | 1.46 | 1.17 | 1.2  | 1076 | 1100 | 87  | 56 | 89  | 60 |
| 582 | 3.6  | 3.53 | 0.91 | 1.25 | 1.01 | 1.04 | 1514 | 1501 | 141 | 73 | 138 | 69 |
| 583 | 2.6  | 4.87 | 0.72 | 2.59 | 1.21 | 1.26 | 1642 | 1626 | 121 | 73 | 120 | 74 |
| 584 | 3.09 | 3.09 | 0.57 | 1.47 | 1.15 | 1.3  | 1140 | 1251 | 101 | 65 | 104 | 68 |
| 585 | 1.14 | 6.59 | 1.19 | 4.89 | 1.02 | 1.11 | 1584 | 1461 | 168 | 96 | 172 | 96 |
| 586 | 1.65 | 3.44 | 3.97 | 1.92 | 1.03 | 1.03 | 1737 | 1634 | 149 | 86 | 147 | 87 |
| 587 | 1.1  | 5.58 | 1.33 | 3.65 | 1.17 | 1.21 | 1250 | 1245 | 107 | 62 | 105 | 64 |
| 588 | 2.2  | 3.53 | 0.99 | 2.16 | 1.14 | 1.22 | 1418 | 1348 | 97  | 59 | 98  | 59 |
| 589 | 1.05 | 3.36 | 0.94 | 1.93 | 1.12 | 1.15 | 1412 | 1490 | 128 | 86 | 124 | 86 |
| 590 | 0.78 | 2.41 | 0.85 | 1.24 | 1.17 | 1.14 | 1124 | 1092 | 104 | 66 | 102 | 66 |
| 591 | 1.55 | 5.09 | 0.85 | 3.79 | 1.28 | 1.2  | 1420 | 1522 | 108 | 60 | 108 | 61 |
| 592 | 0.89 | 3.12 | 1.53 | 1.05 | 1.13 | 1.1  | 1389 | 1395 | 144 | 81 | 143 | 79 |
| 593 | 2.4  | 3.27 | 0.85 | 1.66 | 1.2  | 1.17 | 1381 | 1365 | 126 | 67 | 127 | 70 |
| 594 | 1.41 | 2.83 | 0.83 | 1.52 | 1.15 | 1.17 | 1285 | 1343 | 108 | 63 | 108 | 69 |
| 595 | 2.31 | 2.47 | 0.62 | 0.87 | 1.11 | 1.14 | 1377 | 1495 | 110 | 65 | 102 | 62 |
| 596 | 1.39 | 5.57 | 0.83 | 3.93 | 1.26 | 1.17 | 1825 | 1756 | 135 | 88 | 138 | 86 |
| 597 | 0.94 | 2.65 | 0.96 | 1.19 | 1.09 | 1.06 | 1640 | 1727 | 126 | 69 | 127 | 69 |
| 598 | 1.79 | 4.51 | 1.4  | 2.53 | 1.18 | 1.16 | 1794 | 1840 | 131 | 68 | 131 | 62 |
| 599 | 2.33 | 4.07 | 0.76 | 2.45 | 1.13 | 1.11 | 1674 | 1829 | 142 | 77 | 147 | 77 |
| 600 | 0.86 | 4.23 | 1.42 | 2.4  | 1.19 | 1.23 | 1692 | 1770 | 114 | 58 | 113 | 55 |
| 601 | 1.8  | 3.01 | 1.13 | 1.16 | 1.29 | 1.36 | 1678 | 1669 | 132 | 84 | 137 | 87 |
| 602 | 1.12 | 3.96 | 0.79 | 2.54 | 1.11 | 1.13 | 1795 | 1846 | 141 | 74 | 138 | 70 |
| 603 | 5.09 | 5.09 | 1.39 | 2.99 | 1.14 | 1.16 | 1509 | 1500 | 111 | 62 | 112 | 60 |
| 604 | 0.16 | 4.03 | 1.7  | 1.95 | 1    | 1.1  | 1749 | 1765 | 123 | 63 | 138 | 71 |
| 605 | 1.19 | 3.97 | 1.9  | 2.57 | 1.22 | 1.19 | 1589 | 1582 | 120 | 66 | 120 | 66 |
| 606 | 2.21 | 4.67 | 0.88 | 2.99 | 1.19 | 1.22 | 1822 | 1852 | 155 | 93 | 156 | 89 |
| 607 | 1.05 | 2.56 | 0.87 | 1.39 | 0.93 | 1.07 | 1206 | 1164 | 119 | 68 | 124 | 70 |

|     |      |      |      |      |      |      |      |      |     |    |     |    |
|-----|------|------|------|------|------|------|------|------|-----|----|-----|----|
| 608 | 0.82 | 4.19 | 1.5  | 2.17 | 1.24 | 1.24 | 1588 | 1646 | 121 | 66 | 125 | 62 |
| 609 | 1.32 | 5.12 | 1.06 | 3.49 | 1.14 | 1.19 | 1677 | 1683 | 120 | 72 | 118 | 72 |
| 610 | 0.62 | 2.84 | 0.97 | 1.6  | 1.07 | 1.11 | 1633 | 1661 | 121 | 68 | 120 | 71 |
| 611 | 0.84 | 6.1  | 1.25 | 4.24 | 1.24 | 1.22 | 1518 | 1535 | 129 | 78 | 127 | 70 |
| 612 | 1.26 | 3.66 | 0.87 | 2.33 | 1.16 | 1.19 | 1432 | 1430 | 121 | 75 | 123 | 74 |
| 613 | 1.46 | 5.29 | 1.16 | 3.6  | 1    | 0.9  | 1534 | 1481 | 118 | 69 | 120 | 66 |
| 614 | 2.04 | 2.93 | 0.75 | 1.41 | 1.19 | 1.18 | 1384 | 1436 | 124 | 78 | 132 | 83 |
| 615 | 0.71 | 4.24 | 1.68 | 2.04 | 1.13 | 1.2  | 1806 | 1875 | 123 | 72 | 123 | 67 |
| 616 | 0.99 | 4.15 | 1.08 | 2.83 | 1.21 | 1.25 | 1506 | 1391 | 95  | 51 | 94  | 56 |
| 617 | 1.82 | 3.42 | 0.95 | 1.87 | 0.78 | 0.78 | 1754 | 1743 | 144 | 82 | 141 | 77 |
| 618 | 0.74 | 4.63 | 1.08 | 3.11 | 1    | 1.11 | 1278 | 1363 | 121 | 64 | 120 | 65 |
| 619 | 1.45 | 3.96 | 1.07 | 2.26 | 0.61 | 0.86 | 1007 | 1448 | 138 | 76 | 140 | 66 |
| 620 | 1.59 | 0.76 | 1.91 | 1.91 | 0.98 | 0.98 | 1321 | 1337 | 93  | 60 | 94  | 62 |
| 621 | 1.13 | 5.66 | 1.22 | 4.21 | 1.1  | 1.13 | 1633 | 1597 | 134 | 81 | 133 | 82 |
| 622 | 2.12 | 4.51 | 0.98 | 2.65 | 1.05 | 1.07 | 1762 | 1710 | 140 | 68 | 139 | 69 |
| 623 | 4.21 | 5.08 | 0.74 | 2.58 | 1.21 | 1.18 | 1876 | 1992 | 163 | 94 | 165 | 94 |
| 624 | 2.38 | 4.83 | 0.89 | 2.73 | 1.31 | 1.16 | 189  | 1907 | 122 | 73 | 120 | 71 |
| 625 | 0.53 | 3.47 | 1.24 | 1.93 | 1.15 | 1.12 | 1608 | 1669 | 136 | 88 | 132 | 84 |
| 626 | 1.18 | 3.64 | 0.82 | 2.51 | 1.13 | 1.07 | 1817 | 1896 | 135 | 74 | 137 | 73 |
| 627 | 1.01 | 3.85 | 1.01 | 2.38 | 1.12 | 1.08 | 1697 | 1699 | 131 | 74 | 128 | 73 |
| 628 | 1.22 | 3.3  | 1.09 | 1.67 | 1.19 | 1.15 | 1804 | 1716 | 147 | 66 | 144 | 63 |
| 629 | 2.19 | 5.54 | 1.15 | 3.27 | 0.69 | 0.74 | 1734 | 1463 | 179 | 92 | 180 | 91 |
| 630 | 0.96 | 3.44 | 0.91 | 2.18 | 1.26 | 1.19 | 1446 | 1407 | 118 | 63 | 111 | 67 |
| 631 | 1.22 | 3.13 | 1.24 | 1.54 | 1.3  | 1.32 | 1228 | 1224 | 116 | 68 | 116 | 70 |
| 632 | 1.23 | 3.81 | 1.01 | 2.29 | 1.23 | 1.23 | 1545 | 1789 | 141 | 82 | 142 | 83 |
| 633 | 0.77 | 4.32 | 1.06 | 3.01 | 1.17 | 1.22 | 1371 | 1425 | 109 | 72 | 106 | 69 |
| 634 | 1.57 | 4.29 | 1    | 2.87 | 1.14 | 1.23 | 1813 | 1715 | 147 | 82 | 140 | 79 |
| 635 | 1.94 | 4.69 | 0.99 | 2.72 | 1.18 | 1.16 | 1607 | 1593 | 125 | 73 | 128 | 75 |
| 636 | 2.05 | 4    | 0.77 | 2.13 | 1.1  | 0.7  | 1346 | 993  | 125 | 69 | 119 | 71 |
| 637 | 2.16 | 5.15 | 1.1  | 3.3  | 0.96 | 1.02 | 1306 | 1418 | 105 | 60 | 103 | 65 |
| 638 | 1.36 | 3.69 | 0.77 | 2.44 | 1.26 | 1.17 | 1454 | 1423 | 117 | 80 | 116 | 77 |
| 639 | 0.85 | 5.52 | 1.69 | 3.35 | 1.07 | 1.01 | 145  | 1407 | 122 | 62 | 121 | 62 |
| 640 | 0.65 | 3.85 | 1.56 | 1.61 | 1.02 | 1.11 | 1229 | 1234 | 93  | 54 | 101 | 53 |
| 641 | 1.58 | 6.1  | 1.09 | 4.14 | 1.19 | 1.21 | 1654 | 1638 | 140 | 86 | 140 | 85 |
| 642 | 1.71 | 2.46 | 0.51 | 1.08 | 1.05 | 1.03 | 1819 | 1782 | 123 | 74 | 132 | 74 |
| 643 | 6.59 | 5.62 | 0.98 | 1.91 | 1.18 | 1.15 | 1423 | 1414 | 131 | 78 | 131 | 79 |
| 644 | 1.01 | 2.43 | 0.85 | 1.13 | 1.1  | 1.08 | 1225 | 1244 | 105 | 68 | 105 | 64 |
| 645 | 2.71 | 4.46 | 1.14 | 2.14 | 1.2  | 1.18 | 1324 | 1333 | 122 | 76 | 123 | 74 |

|     |      |      |      |      |      |      |      |      |     |    |     |    |
|-----|------|------|------|------|------|------|------|------|-----|----|-----|----|
| 646 | 3.97 | 5.38 | 0.36 | 2.58 | 1.24 | 1.18 | 2072 | 2193 | 136 | 68 | 132 | 64 |
| 647 | 0.87 | 3.71 | 1.08 | 2.32 | 1    | 0.77 | 1331 | 1187 | 138 | 82 | 136 | 79 |
| 648 | 1.45 | 3.55 | 0.86 | 2.05 | 1.18 | 1.16 | 1518 | 1510 | 129 | 86 | 125 | 86 |
| 649 | 1.67 | 2.8  | 0.66 | 1.59 | 1.13 | 1.12 | 1286 | 1305 | 118 | 72 | 115 | 65 |
| 650 | 1.04 | 4.08 | 1.48 | 1.98 | 1.02 | 1.06 | 1291 | 1447 | 128 | 63 | 127 | 66 |
| 651 | 0.8  | 3.21 | 1.13 | 1.75 | 1.11 | 1.05 | 1653 | 1677 | 133 | 76 | 125 | 71 |
| 652 | 0.61 | 3.24 | 0.98 | 1.69 | 1.22 | 1.18 | 1524 | 1635 | 134 | 79 | 129 | 80 |
| 653 | 0.95 | 5.95 | 1.03 | 4.17 | 1.11 | 1.1  | 1154 | 1086 | 105 | 61 | 99  | 56 |
| 654 | 2.44 | 2.94 | 0.8  | 1.5  | 1.1  | 1.15 | 1544 | 1599 | 117 | 65 | 119 | 70 |
| 655 | 1.07 | 2.9  | 1.01 | 1.44 | 1.09 | 1.14 | 1612 | 1595 | 120 | 58 | 121 | 60 |
| 656 | 1.25 | 2.79 | 0.65 | 1.7  | 0.97 | 1.06 | 1391 | 1418 | 147 | 92 | 154 | 96 |
| 657 | 1.86 | 3.78 | 1.22 | 1.93 | 1.18 | 1.18 | 1805 | 1842 | 142 | 83 | 143 | 84 |
| 658 | 1.5  | 3.28 | 0.86 | 1.84 | 1.18 | 1.13 | 1431 | 1537 | 130 | 64 | 129 | 64 |
| 659 | 2.41 | 3.96 | 1.06 | 2.09 | 1.06 | 1.1  | 1409 | 1410 | 138 | 73 | 150 | 82 |
| 660 | 1.31 | 3.81 | 0.88 | 2.36 | 1.36 | 1.14 | 1633 | 1822 | 122 | 74 | 125 | 73 |
| 661 | 1.11 | 3.77 | 1.02 | 2.33 | 1.03 | 1.07 | 1776 | 1743 | 124 | 87 | 145 | 61 |
| 662 | 1.27 | 3.48 | 1.11 | 1.69 | 1.27 | 1.29 | 1588 | 1623 | 130 | 69 | 128 | 67 |
| 663 | 3.03 | 3.17 | 0.71 | 1.58 | 1.14 | 1.31 | 1468 | 1440 | 131 | 80 | 135 | 84 |
| 664 | 1.6  | 4.09 | 1.08 | 2.32 | 1.18 | 1.13 | 1586 | 1513 | 121 | 77 | 126 | 80 |
| 665 | 1.35 | 5.76 | 1.29 | 3.85 | 1.16 | 1.19 | 1807 | 1821 | 137 | 83 | 145 | 84 |
| 666 | 1.14 | 5.3  | 0.3  | 3.96 | 1.16 | 1.04 | 2092 | 2122 | 129 | 75 | 126 | 76 |
| 667 | 0.9  | 3.26 | 1.14 | 1.92 | 1.15 | 1.19 | 1990 | 1838 | 139 | 78 | 133 | 78 |
| 668 | 0.93 | 2.95 | 1.58 | 1.02 | 0.93 | 1.05 | 1770 | 1793 | 147 | 86 | 153 | 86 |
| 669 | 5.89 | 3.68 | 0.58 | 0.95 | 0.88 | 0.94 | 1656 | 1817 | 163 | 84 | 165 | 81 |
| 670 | 2.85 | 3.53 | 0.74 | 1.86 | 1.09 | 1.12 | 1361 | 1581 | 107 | 62 | 113 | 70 |
| 671 | 1.07 | 3.33 | 0.88 | 1.36 | 1.22 | 1.12 | 1687 | 1690 | 117 | 66 | 118 | 67 |
| 672 | 5.75 | 7.01 | 1.74 | 3.3  | 1.17 | 1.2  | 1432 | 1390 | 122 | 71 | 120 | 71 |
| 673 | 4.42 | 5.15 | 1.01 | 3.16 | 1.07 | 1.09 | 1842 | 1863 | 150 | 84 | 157 | 87 |
| 674 | 2.71 | 2.76 | 0.76 | 1.32 | 1.13 | 1.14 | 1525 | 1527 | 114 | 68 | 115 | 73 |
| 675 | 1.73 | 3.47 | 0.77 | 2.14 | 1.12 | 1.09 | 1308 | 1266 | 122 | 72 | 129 | 72 |
| 676 | 1.01 | 3.6  | 0.6  | 2.11 | 1.18 | 1.18 | 1170 | 1113 | 124 | 62 | 124 | 61 |
| 677 | 2.31 | 4.59 | 0.97 | 2.91 | 1.14 | 1.05 | 1097 | 1109 | 105 | 66 | 100 | 60 |
| 678 | 0.91 | 3.37 | 1.3  | 1.68 | 1.24 | 1.28 | 1515 | 1576 | 127 | 85 | 128 | 87 |
| 679 | 1.76 | 3.02 | 0.76 | 1.63 | 1.17 | 1.21 | 1827 | 1949 | 123 | 65 | 119 | 65 |
| 680 | 4.85 | 3.79 | 0.74 | 1.06 | 1.12 | 1.04 | 1058 | 1092 | 99  | 61 | 102 | 59 |
| 681 | 0.43 | 3.38 | 1.12 | 2.02 | 1.23 | 1.32 | 1414 | 1399 | 124 | 69 | 123 | 70 |
| 682 | 0.81 | 3.32 | 1.06 | 2.05 | 1.15 | 1.25 | 1987 | 1973 | 139 | 73 | 141 | 71 |
| 683 | 1.73 | 3.4  | 0.66 | 2.22 | 1.09 | 1.11 | 1501 | 1533 | 114 | 77 | 113 | 76 |

|     |       |       |      |      |      |      |      |      |     |    |     |    |
|-----|-------|-------|------|------|------|------|------|------|-----|----|-----|----|
| 684 | 0.83  | 3.31  | 1.6  | 1.27 | 1.26 | 1.25 | 1524 | 1548 | 119 | 65 | 121 | 65 |
| 685 | 1.62  | 3.09  | 0.97 | 1.58 | 1.28 | 1.26 | 1213 | 1215 | 104 | 65 | 105 | 62 |
| 686 | 3.49  | 6.66  | 0.97 | 3.59 | 1.25 | 1.14 | 1346 | 1376 | 119 | 74 | 116 | 67 |
| 687 | 0.88  | 6.39  | 1.21 | 4.24 | 1.24 | 1.25 | 1656 | 1639 | 128 | 67 | 128 | 62 |
| 688 | 1.3   | 2.7   | 0.75 | 1.59 | 1.28 | 1.12 | 1808 | 1828 | 114 | 73 | 114 | 81 |
| 689 | 1.48  | 4.29  | 1.01 | 2.78 | 1.2  | 1.16 | 1188 | 1159 | 99  | 57 | 102 | 59 |
| 690 | 1.38  | 1.51  | 1.17 | 2.77 | 1.19 | 1.15 | 1794 | 1695 | 133 | 69 | 137 | 77 |
| 691 | 1.73  | 5.52  | 0.87 | 3.99 | 1.24 | 1.14 | 1452 | 1353 | 125 | 78 | 132 | 78 |
| 692 | 0.56  | 3.03  | 1.3  | 1.51 | 1.19 | 1.23 | 1365 | 1347 | 115 | 63 | 112 | 65 |
| 693 | 0.99  | 3.51  | 1.21 | 1.64 | 1.19 | 1.23 | 1751 | 1811 | 136 | 75 | 137 | 76 |
| 694 | 2.61  | 6.17  | 1.17 | 4.2  | 0.97 | 0.96 | 1276 | 1247 | 115 | 60 | 113 | 76 |
| 695 | 1.02  | 3.5   | 1.14 | 2.09 | 1.07 | 1.1  | 1011 | 1056 | 107 | 62 | 110 | 59 |
| 696 | 1.59  | 4.64  | 1.15 | 3.06 | 1.15 | 1.1  | 1567 | 1550 | 122 | 73 | 121 | 77 |
| 697 | 1.47  | 3.29  | 0.91 | 1.84 | 1.2  | 1.16 | 1597 | 1643 | 117 | 68 | 115 | 69 |
| 698 | 1.68  | 3.55  | 0.87 | 2.13 | 1.12 | 1.27 | 1392 | 1333 | 118 | 80 | 121 | 83 |
| 699 | 1.53  | 4.84  | 0.9  | 3.32 | 1.16 | 1.1  | 1411 | 1460 | 124 | 71 | 128 | 72 |
| 700 | 1.51  | 4.97  | 1.11 | 3.18 | 0.94 | 1.05 | 1087 | 1166 | 114 | 80 | 124 | 79 |
| 701 | 13.57 | 7.39  | 0.78 | 1.58 | 1.17 | 1.22 | 1791 | 1734 | 144 | 80 | 145 | 83 |
| 702 | 2.01  | 3     | 0.95 | 1.29 | 1.22 | 1.21 | 1550 | 1551 | 115 | 76 | 117 | 78 |
| 703 | 0.59  | 2.92  | 1.16 | 1.27 | 1.18 | 1.07 | 1885 | 2077 | 162 | 79 | 147 | 77 |
| 704 | 1.2   | 10.26 | 1.11 | 8.21 | 1.06 | 1.09 | 1475 | 1489 | 130 | 80 | 133 | 80 |
| 705 | 0.96  | 4.12  | 1.18 | 2.67 | 1.14 | 1.15 | 1240 | 1424 | 129 | 70 | 132 | 74 |
| 706 | 2.51  | 2.66  | 0.55 | 2.96 | 0.9  | 1.49 | 2345 | 2306 | 143 | 81 | 152 | 84 |
| 707 | 4.58  | 4.58  | 1    | 2.62 | 1.07 | 1.13 | 1060 | 1030 | 131 | 91 | 137 | 89 |
| 708 | 2.28  | 1.63  | 0.8  | 3.84 | 1.15 | 1.15 | 1497 | 1529 | 114 | 72 | 113 | 73 |
| 709 | 1.05  | 4.13  | 1.05 | 1.4  | 1.11 | 1.11 | 3051 | 2191 | 151 | 89 | 148 | 85 |
| 710 | 1.75  | 4.34  | 1.12 | 2.61 | 0.72 | 0.81 | 1762 | 1761 | 136 | 70 | 138 | 74 |
| 711 | 1.28  | 3.98  | 1.15 | 2.26 | 1.06 | 1.03 | 1488 | 1452 | 131 | 84 | 142 | 86 |
| 712 | 3.21  | 5.66  | 0.82 | 3.6  | 1.11 | 1.12 | 1459 | 1489 | 130 | 81 | 132 | 79 |
| 713 | 0.76  | 3.8   | 1.05 | 2.56 | 1.08 | 1.02 | 1662 | 1672 | 107 | 70 | 127 | 85 |
| 714 | 2.2   | 4.55  | 0.88 | 2.79 | 1.08 | 1.1  | 1122 | 1133 | 117 | 76 | 120 | 69 |
| 715 | 1.19  | 3.88  | 0.93 | 2.51 | 1.18 | 1.14 | 1546 | 1580 | 138 | 94 | 143 | 96 |
| 716 | 0.8   | 3.51  | 0.86 | 2.49 | 1.26 | 1.28 | 1855 | 1888 | 136 | 72 | 138 | 74 |
| 717 | 1.09  | 4.45  | 1.31 | 2.64 | 0.96 | 1.13 | 2224 | 2418 | 143 | 76 | 139 | 82 |
| 718 | 1.63  | 4.29  | 0.81 | 2.72 | 1.11 | 1.13 | 1586 | 1597 | 125 | 82 | 125 | 80 |
| 719 | 1.24  | 4.23  | 3.27 | 2.94 | 1.15 | 1.18 | 1644 | 1639 | 141 | 81 | 139 | 76 |
| 720 | 1.06  | 3.61  | 0.85 | 2.37 | 1.05 | 1.07 | 1181 | 1131 | 112 | 67 | 114 | 67 |
| 721 | 1.12  | 3.01  | 0.85 | 1.59 | 1.23 | 1.34 | 1541 | 1574 | 123 | 74 | 124 | 75 |

|     |      |      |      |      |      |      |      |      |     |    |     |    |
|-----|------|------|------|------|------|------|------|------|-----|----|-----|----|
| 722 | 1    | 3.98 | 0.98 | 2.58 | 1.15 | 1.09 | 1199 | 1242 | 111 | 71 | 116 | 70 |
| 723 | 1.08 | 2.48 | 0.68 | 1.86 | 1    | 1.2  | 1729 | 1690 | 101 | 63 | 100 | 65 |
| 724 | 0.94 | 4.56 | 1.34 | 2.75 | 1.19 | 1.12 | 1567 | 1529 | 147 | 89 | 146 | 87 |
| 725 | 1.08 | 3.32 | 0.87 | 1.83 | 0.99 | 0.99 | 1365 | 1384 | 122 | 70 | 134 | 75 |
| 726 | 2.84 | 4.4  | 0.87 | 2.33 | 1.2  | 1.2  | 1387 | 1357 | 113 | 72 | 113 | 68 |
| 727 | 0.93 | 3.22 | 1.29 | 1.54 | 1.14 | 1.16 | 2024 | 2181 | 150 | 70 | 153 | 76 |
| 728 | 1.67 | 0.5  | 1.65 | 3.79 | 1.22 | 1.19 | 1964 | 1923 | 151 | 94 | 156 | 98 |
| 729 | 1.51 | 4.13 | 0.9  | 2.19 | 1.01 | 1.05 | 1516 | 1395 | 141 | 82 | 137 | 82 |
| 730 | 1.82 | 4.25 | 1    | 2.57 | 1.07 | 0.99 | 1768 | 1782 | 123 | 80 | 126 | 79 |
| 731 | 4.65 | 3.53 | 0.85 | 1.23 | 1.23 | 1.21 | 1722 | 1730 | 166 | 95 | 162 | 96 |
| 732 | 1.85 | 4.5  | 1.16 | 2.74 | 1.19 | 1.15 | 2073 | 2130 | 151 | 83 | 149 | 81 |
| 733 | 1.22 | 3.26 | 0.72 | 1.98 | 1.13 | 1.14 | 2178 | 2157 | 143 | 75 | 153 | 77 |
| 734 | 1.26 | 3.17 | 1.21 | 1.42 | 1.2  | 1.21 | 2144 | 2191 | 137 | 62 | 120 | 50 |
| 735 | 2.52 | 6.59 | 1.08 | 4.52 | 0.92 | 0.94 | 2326 | 2265 | 126 | 80 | 145 | 82 |
| 736 | 0.96 | 2.79 | 0.79 | 1.53 | 1.04 | 1.16 | 1842 | 1844 | 140 | 70 | 146 | 73 |
| 737 | 0.75 | 4.71 | 1.07 | 3.39 | 1.1  | 1.13 | 1677 | 1630 | 135 | 79 | 131 | 79 |
| 738 | 1.17 | 3.32 | 1.09 | 1.87 | 0.99 | 1.07 | 1992 | 1886 | 147 | 86 | 152 | 86 |
| 739 | 1.5  | 2.85 | 1.17 | 1.08 | 1.1  | 1.13 | 1342 | 1319 | 131 | 70 | 133 | 72 |
| 740 | 4.51 | 4.51 | 1.07 | 2.84 | 1.14 | 1.11 | 2410 | 2357 | 151 | 81 | 147 | 81 |
| 741 | 2.31 | 5.33 | 1.02 | 3.47 | 1.19 | 1.16 | 1494 | 1505 | 129 | 62 | 125 | 59 |
| 742 | 1.83 | 5.51 | 1.31 | 3.45 | 1.14 | 1.18 | 1829 | 1823 | 129 | 79 | 133 | 81 |
| 743 | 0.64 | 3.61 | 1.31 | 2.06 | 1.1  | 1.18 | 1609 | 1615 | 144 | 73 | 141 | 70 |
| 744 | 0.88 | 2.98 | 1.05 | 1.56 | 1.02 | 1.04 | 1222 | 1188 | 122 | 68 | 128 | 71 |
| 745 | 4.48 | 3.77 | 0.95 | 1.39 | 1.07 | 1.07 | 1519 | 1450 | 111 | 65 | 107 | 65 |
| 746 | 4.63 | 4.37 | 1.04 | 1.78 | 1.14 | 1.17 | 2041 | 2150 | 140 | 81 | 144 | 80 |
| 747 | 2.07 | 4.54 | 0.68 | 3.1  | 0.56 | 0.49 | 886  | 847  | 107 | 65 | 105 | 64 |
| 748 | 1.27 | 4.88 | 0.87 | 3.29 | 1.17 | 1.11 | 1599 | 1660 | 128 | 69 | 133 | 74 |
| 749 | 0.55 | 3.02 | 1.18 | 1.59 | 1.13 | 1.18 | 1158 | 1066 | 111 | 63 | 114 | 65 |
| 750 | 5.3  | 6.79 | 0.9  | 2.6  | 1.01 | 1.14 | 1689 | 1715 | 152 | 99 | 152 | 99 |
| 751 | 1.36 | 5.11 | 1.84 | 2.26 | 1.16 | 1.11 | 2071 | 1932 | 148 | 73 | 146 | 75 |
| 752 | 2.01 | 6.64 | 1.4  | 4.45 | 1.21 | 1.26 | 1247 | 1269 | 104 | 53 | 103 | 49 |
| 753 | 1.98 | 3.74 | 0.75 | 2.48 | 1.04 | 1.07 | 1312 | 1289 | 109 | 74 | 114 | 80 |
| 754 | 0.73 | 3.6  | 1.4  | 1.69 | 1.23 | 1.21 | 1597 | 1500 | 140 | 64 | 143 | 64 |
| 755 | 2.45 | 5.86 | 1.15 | 3.84 | 1.12 | 1    | 1416 | 1463 | 120 | 74 | 120 | 66 |
| 756 | 1.06 | 4.04 | 1.17 | 2.47 | 1.11 | 1.26 | 1904 | 1820 | 122 | 67 | 124 | 75 |
| 757 | 2.8  | 4.01 | 0.97 | 2.15 | 1.27 | 1.23 | 1519 | 1547 | 130 | 73 | 132 | 78 |
| 758 | 3.02 | 5.13 | 0.84 | 2.84 | 1.23 | 1.18 | 1130 | 1302 | 112 | 74 | 113 | 73 |
| 759 | 1.77 | 3.83 | 1.65 | 0.47 | 1.14 | 1.16 | 1257 | 1284 | 111 | 70 | 113 | 67 |

|     |      |      |      |      |      |      |      |      |     |    |     |    |
|-----|------|------|------|------|------|------|------|------|-----|----|-----|----|
| 760 | 2.15 | 5.32 | 0.82 | 3.58 | 0.49 | 0.64 | 733  | 1608 | 114 | 71 | 125 | 71 |
| 761 | 2.01 | 4.04 | 0.87 | 2.36 | 1.12 | 1.15 | 1319 | 1302 | 123 | 75 | 118 | 71 |
| 762 | 4.18 | 3.65 | 0.9  | 1.62 | 1.13 | 1.19 | 1662 | 1606 | 136 | 82 | 132 | 81 |
| 763 | 0.85 | 4.07 | 1.11 | 2.15 | 1.08 | 1.08 | 1175 | 1264 | 108 | 70 | 108 | 69 |
| 764 | 1.08 | 3.1  | 0.81 | 1.98 | 1.03 | 1.09 | 1440 | 1404 | 126 | 73 | 119 | 70 |
| 765 | 1.58 | 4.57 | 1.16 | 1.43 | 1.23 | 1.16 | 1531 | 1540 | 127 | 74 | 116 | 70 |
| 766 | 1.45 | 6.57 | 1.39 | 4.04 | 1.05 | 1.06 | 1163 | 1162 | 107 | 51 | 107 | 51 |
| 767 | 1.3  | 4.61 | 1.11 | 2.9  | 1.13 | 1.2  | 1706 | 1693 | 128 | 71 | 127 | 67 |
| 768 | 0.8  | 3.43 | 1.58 | 1.45 | 1.2  | 1.2  | 2072 | 2099 | 138 | 79 | 142 | 75 |
| 769 | 1.26 | 5.81 | 1.34 | 3.79 | 1.04 | 1.1  | 1492 | 1594 | 141 | 75 | 134 | 72 |
| 770 | 1.1  | 4.67 | 1.36 | 1.67 | 1.29 | 1.22 | 1473 | 1517 | 147 | 79 | 147 | 80 |
| 771 | 1.02 | 3.8  | 1.08 | 2.32 | 1.21 | 1.31 | 1368 | 1333 | 114 | 68 | 116 | 67 |
| 772 | 1.42 | 3.28 | 1.93 | 1.93 | 0.68 | 0.85 | 2538 | 1915 | 168 | 89 | 159 | 82 |
| 773 | 1.25 | 4.56 | 0.93 | 3.03 | 1.25 | 1.19 | 1148 | 1168 | 95  | 58 | 94  | 55 |
| 774 | 1.97 | 2.92 | 0.59 | 1.86 | 0.99 | 0.79 | 1800 | 1426 | 142 | 81 | 145 | 81 |
| 775 | 1.07 | 3.72 | 0.94 | 2.44 | 1.14 | 1.18 | 1312 | 1359 | 114 | 67 | 118 | 67 |
| 776 | 1.12 | 4.9  | 1.42 | 2.91 | 1.06 | 0.88 | 1745 | 1744 | 115 | 52 | 123 | 56 |
| 777 | 1.37 | 2.86 | 0.83 | 1.47 | 1.27 | 1.26 | 1250 | 1304 | 118 | 71 | 120 | 76 |
| 778 | 2.54 | 3.75 | 0.69 | 1.93 | 0.94 | 1.1  | 1463 | 1331 | 131 | 73 | 136 | 73 |
| 779 | 1.29 | 4.58 | 0.91 | 3.08 | 1.12 | 1.21 | 1303 | 1367 | 110 | 64 | 109 | 58 |
| 780 | 0.74 | 3.02 | 0.77 | 1.93 | 1.16 | 1.14 | 2743 | 2279 | 154 | 96 | 160 | 94 |
| 781 | 6.41 | 6.9  | 1.1  | 2.28 | 1.22 | 1.16 | 1649 | 1556 | 130 | 69 | 130 | 69 |
| 782 | 1.33 | 3.78 | 0.73 | 2.56 | 1.13 | 1.13 | 1402 | 1473 | 118 | 76 | 120 | 95 |
| 783 | 0.72 | 2.5  | 0.87 | 2.31 | 0.93 | 1.18 | 1455 | 1537 | 118 | 69 | 125 | 70 |
| 784 | 0.73 | 6.83 | 1.86 | 4.24 | 1.12 | 1.11 | 1555 | 1530 | 110 | 65 | 105 | 61 |
| 785 | 1.6  | 6.08 | 1.48 | 3.93 | 1.07 | 1.13 | 1471 | 1510 | 106 | 61 | 104 | 58 |
| 786 | 2.7  | 5.56 | 1.26 | 3.14 | 1.11 | 1.13 | 2548 | 2397 | 132 | 66 | 136 | 70 |
| 787 | 2.19 | 4.81 | 1.2  | 2.74 | 1.06 | 1.12 | 1076 | 1079 | 109 | 65 | 113 | 64 |
| 788 | 0.58 | 4.41 | 1.39 | 2.52 | 1.26 | 1.23 | 1512 | 1491 | 110 | 57 | 112 | 55 |
| 789 | 1.2  | 5.06 | 1.39 | 3.14 | 1.33 | 1.21 | 1573 | 1647 | 146 | 72 | 150 | 76 |
| 790 | 0.47 | 2.52 | 1.29 | 1.29 | 0.66 | 0.45 | 2666 | 2145 | 106 | 49 | 103 | 47 |
| 791 | 0.85 | 2.48 | 0.9  | 1.19 | 1.18 | 1.13 | 1662 | 1500 | 126 | 78 | 126 | 75 |
| 792 | 0.84 | 2.58 | 0.95 | 1.12 | 1.05 | 1.03 | 1374 | 1367 | 115 | 76 | 113 | 74 |
| 793 | 1.68 | 4.3  | 1.02 | 2.7  | 1.2  | 1.22 | 1789 | 1746 | 165 | 81 | 164 | 77 |
| 794 | 3.38 | 4.13 | 1.09 | 1.98 | 1.05 | 1.11 | 1529 | 1476 | 127 | 49 | 132 | 76 |
| 795 | 1.66 | 3.99 | 1.03 | 2.25 | 1.07 | 1.11 | 1213 | 1142 | 119 | 72 | 122 | 74 |
| 796 | 0.82 | 5.91 | 1.57 | 3.86 | 1.09 | 1.03 | 1793 | 1879 | 125 | 75 | 128 | 73 |
| 797 | 3.83 | 5.15 | 0.73 | 3.19 | 1.12 | 1.16 | 1401 | 1356 | 119 | 70 | 124 | 69 |

|     |      |      |      |      |      |      |      |      |     |     |     |     |
|-----|------|------|------|------|------|------|------|------|-----|-----|-----|-----|
| 798 | 1.76 | 5.43 | 0.79 | 3.89 | 1.33 | 1.24 | 1429 | 1445 | 128 | 70  | 144 | 79  |
| 799 | 1.68 | 5.38 | 0.98 | 3.6  | 1.16 | 1.19 | 1213 | 1305 | 124 | 68  | 119 | 67  |
| 800 | 1.73 | 3.48 | 0.87 | 1.89 | 1.17 | 1.02 | 1144 | 1068 | 102 | 66  | 101 | 66  |
| 801 | 1.08 | 3.09 | 0.93 | 1.9  | 1.16 | 1.18 | 1650 | 1573 | 127 | 81  | 127 | 84  |
| 802 | 2.13 | 7.62 | 1.73 | 4.95 | 1    | 0.97 | 1081 | 1095 | 99  | 63  | 94  | 61  |
| 803 | 1.15 | 4.53 | 1.12 | 2.64 | 1.05 | 1.07 | 1775 | 1959 | 155 | 72  | 142 | 78  |
| 804 | 1.48 | 7.65 | 1.71 | 5.27 | 1.01 | 1.01 | 1864 | 1732 | 141 | 82  | 137 | 79  |
| 805 | 1.17 | 3.49 | 0.97 | 2.27 | 0.77 | 0.79 | 1582 | 1458 | 135 | 63  | 151 | 61  |
| 806 | 2.72 | 3.78 | 0.95 | 2.02 | 1.13 | 1.15 | 1296 | 1294 | 122 | 74  | 118 | 73  |
| 807 | 3.32 | 3.35 | 1.38 | 1.38 | 0.98 | 0.87 | 1430 | 1109 | 99  | 63  | 104 | 62  |
| 808 | 3.93 | 4.11 | 0.78 | 2.15 | 1.12 | 1.13 | 1254 | 1279 | 116 | 74  | 116 | 75  |
| 809 | 2.98 | 4.45 | 0.67 | 2.81 | 0.94 | 0.93 | 1178 | 1146 | 118 | 64  | 125 | 64  |
| 810 | 1.01 | 3.24 | 1    | 1.8  | 1.27 | 1.29 | 1496 | 1485 | 114 | 57  | 112 | 57  |
| 811 | 3.95 | 5.16 | 0.93 | 3.24 | 1.23 | 1.22 | 1365 | 1371 | 113 | 81  | 116 | 80  |
| 812 | 3.78 | 3.85 | 0.76 | 0.76 | 1.09 | 1.1  | 2006 | 1892 | 161 | 91  | 165 | 96  |
| 813 | 2.33 | 5.23 | 0.87 | 3.36 | 1.15 | 1.14 | 1641 | 1606 | 146 | 84  | 142 | 86  |
| 814 | 1.17 | 3.5  | 1.15 | 1.88 | 0.87 | 1.11 | 1525 | 1450 | 125 | 64  | 127 | 68  |
| 815 | 0.74 | 2.93 | 0.96 | 1.58 | 1.22 | 1.27 | 1451 | 1426 | 121 | 72  | 120 | 73  |
| 816 | 1.03 | 5.14 | 1.06 | 3.4  | 1.12 | 1.1  | 1630 | 1653 | 131 | 83  | 136 | 83  |
| 817 | 2.36 | 3.65 | 0.67 | 1.87 | 0.67 | 0.73 | 3047 | 1411 | 126 | 62  | 121 | 59  |
| 818 | 1.75 | 3.3  | 1.2  | 1.44 | 1.1  | 1.17 | 1375 | 1436 | 118 | 70  | 120 | 73  |
| 819 | 2.29 | 3.63 | 0.83 | 2.14 | 1.08 | 1.09 | 1305 | 1325 | 120 | 83  | 116 | 80  |
| 820 | 1.67 | 3.36 | 1.02 | 1    | 1.16 | 1.03 | 1493 | 1676 | 158 | 100 | 153 | 94  |
| 821 | 3.18 | 4.15 | 0.86 | 2.52 | 1.18 | 1.22 | 1232 | 1352 | 129 | 81  | 130 | 83  |
| 822 | 7.42 | 6.88 | 1.13 | 3.23 | 0.99 | 1.01 | 1876 | 1894 | 158 | 86  | 152 | 87  |
| 823 | 2.09 | 3.46 | 1.07 | 1.63 | 1.21 | 1.34 | 1325 | 1314 | 104 | 65  | 100 | 65  |
| 824 | 0.33 | 2.82 | 1.45 | 1.07 | 1.11 | 1.07 | 1267 | 1165 | 107 | 64  | 107 | 69  |
| 825 | 1.19 | 2.99 | 0.77 | 1.68 | 0.83 | 1.08 | 1372 | 1363 | 139 | 83  | 152 | 89  |
| 826 | 0.96 | 3.85 | 1.4  | 1.93 | 1.15 | 1.16 | 1587 | 1457 | 113 | 57  | 111 | 63  |
| 827 | 1.82 | 2.68 | 0.88 | 1.22 | 1.18 | 1.18 | 1808 | 1789 | 126 | 82  | 126 | 83  |
| 828 | 0.74 | 4.59 | 1.42 | 2.78 | 1.01 | 1.07 | 1695 | 1872 | 142 | 80  | 138 | 76  |
| 829 | 2.54 | 5.27 | 1.08 | 3.59 | 0.76 | 0.98 | 1485 | 1728 | 127 | 70  | 126 | 71  |
| 830 | 2.21 | 3.62 | 0.71 | 2.08 | 1.13 | 1.03 | 1609 | 1386 | 115 | 63  | 113 | 57  |
| 831 | 0.93 | 3.18 | 0.96 | 1.76 | 1.09 | 1.07 | 2307 | 2262 | 140 | 77  | 138 | 73  |
| 832 | 2.01 | 5.11 | 1.27 | 2.52 | 1.14 | 1.18 | 2053 | 2249 | 161 | 96  | 160 | 100 |
| 833 | 1.41 | 4.49 | 0.81 | 3.16 | 1.32 | 1.36 | 1347 | 1322 | 124 | 71  | 123 | 70  |
| 834 | 1.28 | 4.34 | 0.71 | 3.18 | 1.13 | 1.15 | 1461 | 1408 | 113 | 77  | 117 | 79  |
| 835 | 2.41 | 4.46 | 0.78 | 2.35 | 1.15 | 0.86 | 1509 | 1454 | 133 | 73  | 132 | 69  |



|     |      |      |      |      |      |      |      |      |     |    |     |    |
|-----|------|------|------|------|------|------|------|------|-----|----|-----|----|
| 836 | 1.8  | 1.8  | 0.82 | 1.9  | 1.11 | 1.11 | 2021 | 1921 | 146 | 94 | 150 | 94 |
| 837 | 1.77 | 4.6  | 1.07 | 2.85 | 1.04 | 0.93 | 1820 | 1896 | 134 | 76 | 134 | 74 |
| 838 | 2.11 | 4.21 | 0.96 | 2.69 | 1.03 | 1.1  | 1263 | 1234 | 117 | 70 | 124 | 77 |
| 839 | 0.61 | 3.26 | 1.03 | 1.89 | 1.15 | 1.11 | 1074 | 1147 | 96  | 56 | 95  | 55 |
| 840 | 1.52 | 3.56 | 1.05 | 2.02 | 0.99 | 1.09 | 1713 | 1738 | 138 | 74 | 140 | 73 |
| 841 | 2.25 | 4.89 | 0.78 | 3.25 | 1.21 | 1.17 | 2559 | 2733 | 137 | 88 | 135 | 84 |
| 842 | 0.73 | 2.96 | 0.85 | 2.18 | 1.16 | 1.13 | 1653 | 1548 | 143 | 79 | 141 | 81 |
| 843 | 0.95 | 3.63 | 0.88 | 2.18 | 1.1  | 0.99 | 1375 | 1454 | 107 | 72 | 104 | 69 |
| 844 | 1.67 | 5.17 | 1.2  | 3.2  | 0.99 | 0.94 | 1998 | 2037 | 124 | 67 | 123 | 66 |
| 845 | 1.24 | 3.53 | 1.31 | 1.74 | 1.11 | 1.21 | 1573 | 1601 | 139 | 98 | 140 | 95 |
| 846 | 1.55 | 4.17 | 0.91 | 2.58 | 1.14 | 1.11 | 1644 | 1686 | 149 | 90 | 144 | 81 |
| 847 | 0.95 | 0.95 | 1.03 | 0.78 | 1.17 | 1.16 | 1863 | 2064 | 138 | 74 | 137 | 73 |
| 848 | 1.1  | 4.23 | 1.14 | 2.61 | 1.15 | 1.18 | 1964 | 2329 | 132 | 70 | 141 | 78 |
| 849 | 0.85 | 3.67 | 1.1  | 2.12 | 1.14 | 0.81 | 1665 | 1747 | 142 | 79 | 147 | 82 |
| 850 | 1.75 | 1.75 | 4.04 | 4.04 | 1.19 | 1.11 | 1788 | 1617 | 98  | 55 | 97  | 56 |
| 851 | 1.98 | 4.16 | 1.4  | 2.23 | 1.02 | 1.11 | 1251 | 1280 | 127 | 79 | 129 | 75 |
| 852 | 1.11 | 5.11 | 1.15 | 3.74 | 1.14 | 1.05 | 1647 | 1637 | 121 | 62 | 123 | 64 |
| 853 | 1.76 | 4.16 | 0.92 | 2.61 | 1.22 | 1.09 | 1481 | 1445 | 119 | 71 | 126 | 73 |
| 854 | 1.92 | 6.57 | 1.25 | 4.22 | 1.12 | 1.13 | 1716 | 1729 | 136 | 88 | 136 | 88 |
| 855 | 1.32 | 3.68 | 1.08 | 2.08 | 1.17 | 1.09 | 1778 | 1832 | 120 | 65 | 121 | 62 |
| 856 | 1.76 | 4.76 | 1.19 | 2.97 | 1.23 | 1.23 | 2100 | 2156 | 143 | 74 | 146 | 76 |
| 857 | 1.99 | 3.81 | 0.98 | 2.14 | 1.15 | 1.17 | 1923 | 1896 | 124 | 65 | 119 | 63 |
| 858 | 3.79 | 4.41 | 0.83 | 1.84 | 1.11 | 1.11 | 1336 | 1316 | 117 | 68 | 114 | 70 |
| 859 | 1.24 | 3.95 | 0.98 | 2.64 | 0.88 | 1.08 | 1673 | 1698 | 130 | 75 | 130 | 81 |
| 860 | 1.98 | 4.78 | 0.91 | 3.3  | 1.23 | 1.2  | 1275 | 1268 | 136 | 86 | 137 | 79 |
| 861 | 0.48 | 2.95 | 1.02 | 1.47 | 1.31 | 1.3  | 1973 | 1939 | 136 | 72 | 137 | 69 |
| 862 | 0.84 | 4.6  | 1.6  | 2.43 | 1.07 | 1.12 | 1349 | 1440 | 130 | 76 | 128 | 68 |
| 863 | 2.08 | 5.65 | 1.23 | 3.46 | 1.03 | 1.02 | 1315 | 1292 | 111 | 76 | 108 | 75 |
| 864 | 0.96 | 2.36 | 0.88 | 1.08 | 1.2  | 1.2  | 1667 | 1480 | 120 | 70 | 123 | 68 |
| 865 | 0.96 | 4.48 | 1.01 | 3.09 | 1.25 | 1.17 | 1390 | 1437 | 138 | 80 | 139 | 84 |
| 866 | 1.56 | 3.54 | 1.18 | 1.54 | 1.15 | 1.14 | 1731 | 1680 | 124 | 71 | 117 | 67 |
| 867 | 1.26 | 3.96 | 1.62 | 1.62 | 1.12 | 1.09 | 1237 | 1173 | 117 | 67 | 114 | 69 |
| 868 | 0.87 | 3.67 | 1.09 | 2.37 | 1.19 | 1.25 | 1257 | 1330 | 109 | 56 | 103 | 51 |
| 869 | 0.89 | 3.03 | 1.18 | 1.47 | 1.14 | 1.17 | 1195 | 1163 | 102 | 64 | 102 | 61 |
| 870 | 1.4  | 4.76 | 1.01 | 3.18 | 1.16 | 1.18 | 1270 | 1326 | 121 | 72 | 113 | 70 |
| 871 | 1.38 | 4.72 | 1.25 | 2.89 | 1.19 | 1.31 | 1218 | 1247 | 99  | 57 | 107 | 62 |
| 872 | 0.97 | 4.97 | 1.69 | 2.66 | 1.17 | 1.16 | 1417 | 1437 | 126 | 70 | 124 | 68 |
| 873 | 1.91 | 4.92 | 1.09 | 3.04 | 1.25 | 1.25 | 1065 | 1006 | 109 | 56 | 114 | 60 |

|     |      |      |      |      |      |      |      |      |     |    |     |    |
|-----|------|------|------|------|------|------|------|------|-----|----|-----|----|
| 874 | 1.73 | 7.15 | 1.55 | 4.11 | 1.17 | 1.17 | 1661 | 1700 | 126 | 67 | 122 | 67 |
| 875 | 0.96 | 2.43 | 0.86 | 1.2  | 1.17 | 1.19 | 1448 | 1437 | 110 | 63 | 105 | 79 |
| 876 | 1.6  | 3.3  | 1.14 | 1.75 | 1.1  | 1.08 | 1353 | 1434 | 119 | 69 | 128 | 73 |
| 877 | 1.41 | 4.7  | 1.23 | 3.02 | 1.11 | 1    | 1264 | 1288 | 106 | 60 | 104 | 61 |
| 878 | 1.25 | 4.33 | 0.99 | 2.86 | 1.19 | 1.14 | 1336 | 1399 | 107 | 74 | 108 | 74 |
| 879 | 2.56 | 6.08 | 1.51 | 3.31 | 1.11 | 1.13 | 1794 | 1802 | 136 | 76 | 136 | 79 |
| 880 | 4.88 | 5.25 | 0.82 | 2.15 | 1.12 | 1.14 | 1999 | 2081 | 146 | 78 | 146 | 75 |
| 881 | 1.07 | 4.21 | 1.11 | 2.69 | 1.07 | 1.1  | 1543 | 1540 | 153 | 75 | 144 | 68 |
| 882 | 1.29 | 4.09 | 2.48 | 2.48 | 1.07 | 1.12 | 1577 | 1602 | 122 | 78 | 120 | 76 |
| 883 | 0.81 | 3.44 | 1.21 | 1.7  | 1.11 | 1.1  | 1146 | 1174 | 104 | 55 | 105 | 53 |
| 884 | 0.59 | 3.29 | 1.26 | 1.76 | 1.15 | 1.17 | 1304 | 1277 | 126 | 77 | 122 | 75 |
| 885 | 1.03 | 5.04 | 1.04 | 5.04 | 0.52 | 0.58 | 814  | 555  | 127 | 69 | 127 | 66 |
| 886 | 0.78 | 2.85 | 1.05 | 1.43 | 1.14 | 1.16 | 1249 | 1282 | 128 | 86 | 128 | 86 |
| 887 | 1.08 | 5.02 | 1.68 | 2.53 | 1.32 | 1.22 | 1564 | 1500 | 129 | 70 | 130 | 71 |
| 888 | 5.64 | 5.84 | 0.97 | 3.57 | 1.26 | 1.26 | 1491 | 1492 | 140 | 88 | 139 | 84 |
| 889 | 2.45 | 5.36 | 0.82 | 3.26 | 1.1  | 1.1  | 1373 | 1346 | 125 | 83 | 123 | 80 |
| 890 | 3.4  | 3.4  | 0.88 | 1.92 | 1.11 | 1.12 | 2029 | 2107 | 134 | 71 | 127 | 65 |
| 891 | 2.36 | 4.24 | 0.72 | 2.76 | 1.13 | 1.17 | 1663 | 1658 | 142 | 90 | 143 | 92 |
| 892 | 2.44 | 4.22 | 0.89 | 2.38 | 1.23 | 1.17 | 1461 | 1552 | 130 | 68 | 132 | 72 |
| 893 | 0.71 | 2.03 | 0.52 | 1.2  | 1.19 | 1.14 | 1768 | 1874 | 103 | 55 | 112 | 57 |
| 894 | 2.2  | 4.07 | 0.66 | 2.56 | 1.13 | 1.08 | 1789 | 1834 | 156 | 88 | 160 | 89 |
| 895 | 1.36 | 4.86 | 0.91 | 3.02 | 1.13 | 1.03 | 2323 | 2321 | 149 | 83 | 147 | 84 |
| 896 | 1.16 | 3.33 | 1.01 | 1.49 | 1.07 | 1.1  | 1776 | 1777 | 136 | 83 | 139 | 81 |
| 897 | 2.4  | 3.57 | 1.03 | 1.74 | 1.16 | 1.15 | 1425 | 1373 | 112 | 71 | 117 | 87 |
| 898 | 1.41 | 3.58 | 0.92 | 2.08 | 1.1  | 1.08 | 1369 | 1337 | 143 | 80 | 149 | 85 |
| 899 | 1.3  | 3.57 | 0.89 | 2.38 | 1.12 | 1.09 | 1482 | 1397 | 117 | 78 | 119 | 79 |
| 900 | 1.73 | 5.06 | 0.92 | 5.06 | 1.15 | 1.21 | 1971 | 1970 | 136 | 63 | 139 | 66 |
| 901 | 1.77 | 3.51 | 1.29 | 1.51 | 1.02 | 1.14 | 2146 | 2165 | 130 | 76 | 136 | 79 |
| 902 | 1.34 | 3.27 | 1.19 | 1.52 | 1.22 | 1.28 | 1636 | 1592 | 142 | 80 | 148 | 80 |
| 903 | 0.71 | 4.11 | 1.45 | 2.15 | 1.12 | 1.16 | 1347 | 1371 | 108 | 66 | 109 | 61 |
| 904 | 0.89 | 3.4  | 1.04 | 1.86 | 0.99 | 1.02 | 1180 | 1340 | 114 | 67 | 112 | 64 |
| 905 | 1.22 | 6.17 | 1.07 | 0.94 | 1.16 | 1.14 | 1695 | 1782 | 154 | 81 | 152 | 76 |
| 906 | 1.83 | 2.86 | 0.58 | 1.6  | 1.09 | 1.09 | 1574 | 1431 | 112 | 58 | 114 | 58 |
| 907 | 1.74 | 4.31 | 1.27 | 2.49 | 1.24 | 1.25 | 1665 | 1584 | 165 | 90 | 167 | 92 |
| 908 | 0.82 | 3.38 | 1.25 | 1.69 | 1.16 | 1.15 | 1427 | 1344 | 110 | 58 | 102 | 58 |
| 909 | 2.4  | 3.58 | 0.81 | 1.86 | 0.99 | 0.83 | 1683 | 1568 | 149 | 66 | 144 | 66 |
| 910 | 2.1  | 2.59 | 0.94 | 1.21 | 1.13 | 1.11 | 1286 | 1269 | 117 | 76 | 119 | 71 |
| 911 | 1.11 | 3.96 | 0.86 | 3.96 | 1.32 | 1.18 | 1306 | 1306 | 113 | 70 | 114 | 71 |

|     |      |      |      |      |      |      |      |      |     |    |     |    |
|-----|------|------|------|------|------|------|------|------|-----|----|-----|----|
| 912 | 0.93 | 3.87 | 1.08 | 2.49 | 1.19 | 1.17 | 1628 | 1622 | 143 | 89 | 140 | 88 |
| 913 | 1.19 | 4.18 | 1.41 | 2.22 | 1.27 | 1.25 | 1654 | 1656 | 120 | 71 | 123 | 71 |
| 914 | 1.99 | 5.13 | 1.19 | 3.11 | 1.15 | 1.17 | 1365 | 1483 | 113 | 76 | 114 | 78 |
| 915 | 0.93 | 2.93 | 0.95 | 1.55 | 1.25 | 1.1  | 1598 | 1696 | 134 | 82 | 140 | 88 |
| 916 | 1.08 | 3.97 | 0.92 | 2.79 | 1.12 | 1.14 | 1962 | 1871 | 147 | 75 | 132 | 70 |
| 917 | 1.54 | 5.5  | 1.4  | 3.39 | 1.19 | 1.21 | 2188 | 2257 | 150 | 78 | 154 | 81 |
| 918 | 2.03 | 3.54 | 0.85 | 2.01 | 1.02 | 1.05 | 1290 | 1392 | 117 | 72 | 120 | 75 |
| 919 | 1.21 | 4.75 | 0.97 | 3.29 | 1.03 | 0.94 | 1413 | 1518 | 130 | 75 | 128 | 77 |
| 920 | 0.99 | 4.43 | 1.27 | 2.76 | 1.08 | 1.14 | 1919 | 1855 | 115 | 77 | 112 | 77 |
| 921 | 1    | 2.52 | 1.03 | 2.52 | 1.13 | 1.09 | 1512 | 1539 | 122 | 68 | 126 | 71 |
| 922 | 1.01 | 2.31 | 0.92 | 0.91 | 1.13 | 1.11 | 1516 | 1497 | 109 | 58 | 110 | 59 |
| 923 | 0.73 | 3.82 | 1.01 | 2.55 | 1.11 | 1.11 | 1380 | 1467 | 148 | 86 | 146 | 83 |
| 924 | 0.52 | 3.7  | 1.32 | 2.09 | 1.08 | 1.04 | 1597 | 1412 | 131 | 82 | 128 | 61 |
| 925 | 0.78 | 2.32 | 0.78 | 1.25 | 1.19 | 1.13 | 1303 | 1330 | 125 | 74 | 122 | 72 |
| 926 | 1.27 | 2.7  | 0.8  | 1.42 | 1.08 | 1.1  | 1286 | 1310 | 118 | 79 | 121 | 75 |
| 927 | 2.17 | 2.94 | 0.88 | 1.15 | 1.17 | 1.19 | 1378 | 1464 | 129 | 74 | 125 | 72 |
| 928 | 3.86 | 4.68 | 0.86 | 2.73 | 1.11 | 1.14 | 1356 | 1411 | 134 | 92 | 138 | 91 |
| 929 | 1.37 | 4.22 | 1.07 | 2.68 | 1.12 | 1.13 | 1394 | 1334 | 126 | 72 | 122 | 75 |
| 930 | 3.63 | 3.93 | 0.89 | 1.47 | 1.09 | 1.14 | 1742 | 1798 | 159 | 75 | 160 | 75 |
| 931 | 1.62 | 5.06 | 0.97 | 3.1  | 0.98 | 0.71 | 1864 | 1261 | 181 | 85 | 180 | 82 |
| 932 | 3.46 | 2.8  | 0.83 | 1.06 | 1.12 | 1.17 | 1110 | 1044 | 120 | 70 | 121 | 68 |
| 933 | 0.75 | 4.24 | 1.65 | 2.14 | 0.51 | 0.95 | 1328 | 1790 | 112 | 54 | 108 | 54 |
| 934 | 1.32 | 3.75 | 0.94 | 2.3  | 1.05 | 1.06 | 1421 | 1504 | 122 | 69 | 120 | 68 |
| 935 | 2.82 | 4.54 | 0.91 | 2.44 | 1.12 | 1.08 | 1408 | 1376 | 123 | 77 | 132 | 83 |
| 936 | 1.78 | 3.95 | 0.91 | 2.33 | 1.1  | 1.12 | 1698 | 1884 | 124 | 79 | 125 | 77 |
| 937 | 1.1  | 4.39 | 1.34 | 2.4  | 1.03 | 0.95 | 1176 | 1077 | 120 | 72 | 120 | 64 |
| 938 | 0.75 | 3.05 | 1.19 | 1.54 | 1.21 | 1.21 | 1572 | 1548 | 126 | 71 | 124 | 66 |
| 939 | 7.3  | 2.21 | 0.63 | 0.91 | 1.25 | 1.21 | 1740 | 1626 | 150 | 89 | 159 | 94 |
| 940 | 2.65 | 3.13 | 0.93 | 1.38 | 1.08 | 1.13 | 1613 | 1541 | 131 | 74 | 125 | 74 |
| 941 | 2.07 | 3.07 | 0.68 | 1.81 | 1    | 1.1  | 1673 | 1712 | 142 | 78 | 137 | 82 |
| 942 | 0.93 | 4.36 | 1.11 | 2.71 | 1.22 | 1.26 | 1196 | 1224 | 141 | 91 | 140 | 91 |
| 943 | 2.5  | 4.77 | 1.2  | 2.67 | 1.2  | 1.17 | 1680 | 1849 | 136 | 82 | 138 | 83 |
| 944 | 0.81 | 4.18 | 1.64 | 2.14 | 1.18 | 1.16 | 1623 | 1687 | 128 | 72 | 133 | 75 |
| 945 | 1.97 | 4.14 | 0.96 | 2.49 | 1.22 | 1.28 | 1487 | 1491 | 129 | 78 | 131 | 79 |
| 946 | 0.56 | 4.51 | 1.37 | 2.71 | 1.28 | 1.2  | 1456 | 1418 | 116 | 59 | 116 | 61 |
| 947 | 0.82 | 3.44 | 1.48 | 1.49 | 1.13 | 1.19 | 1549 | 1318 | 126 | 78 | 123 | 78 |
| 948 | 0.59 | 3.25 | 1.16 | 1.78 | 1.18 | 1.22 | 1490 | 1497 | 123 | 67 | 119 | 63 |
| 949 | 1.19 | 4.69 | 1.25 | 2.8  | 1.17 | 1.15 | 1499 | 1546 | 102 | 62 | 100 | 59 |

|     |      |      |      |      |      |      |      |      |     |    |     |    |
|-----|------|------|------|------|------|------|------|------|-----|----|-----|----|
| 950 | 0.69 | 3.75 | 1.14 | 2.32 | 1.09 | 1.16 | 1409 | 1405 | 127 | 72 | 126 | 70 |
| 951 | 0.66 | 2.61 | 1.15 | 1.16 | 1.17 | 1.15 | 1658 | 1468 | 109 | 55 | 108 | 53 |
| 952 | 2.91 | 4.03 | 1.01 | 1.96 | 1.1  | 1.15 | 1878 | 1882 | 160 | 98 | 162 | 99 |
| 953 | 1.44 | 5.05 | 1.5  | 2.53 | 1.01 | 1.12 | 1529 | 1663 | 146 | 82 | 143 | 82 |
| 954 | 0.87 | 3.59 | 1.11 | 2.21 | 1.15 | 1.15 | 2360 | 2351 | 118 | 67 | 123 | 72 |
| 955 | 0.58 | 2.78 | 1.19 | 1.31 | 1.07 | 1.1  | 1255 | 1163 | 104 | 55 | 98  | 48 |
| 956 | 2.38 | 4.1  | 0.94 | 2.23 | 1.11 | 1.02 | 1648 | 1612 | 165 | 86 | 171 | 89 |
| 957 | 1.39 | 5.05 | 1.14 | 3.25 | 1.23 | 1.23 | 1454 | 1410 | 136 | 81 | 133 | 77 |
| 958 | 1.55 | 3.59 | 0.76 | 2.42 | 1.24 | 1.21 | 1322 | 1335 | 109 | 67 | 111 | 67 |
| 959 | 2.05 | 4.56 | 1.26 | 2.77 | 1.12 | 1.15 | 1760 | 1832 | 123 | 68 | 129 | 83 |
| 960 | 1.05 | 3.66 | 1.39 | 1.88 | 1.08 | 1.14 | 1725 | 1678 | 144 | 82 | 129 | 80 |
| 961 | 1.73 | 2.63 | 1.05 | 1.95 | 1.12 | 1.12 | 2797 | 2803 | 146 | 74 | 147 | 79 |
| 962 | 1.86 | 5.3  | 0.97 | 3.64 | 1.12 | 1.17 | 1416 | 1529 | 126 | 80 | 133 | 84 |
| 963 | 1.13 | 4.29 | 1.88 | 1.9  | 1.23 | 1.18 | 1645 | 1610 | 142 | 77 | 141 | 79 |
| 964 | 1.33 | 4.25 | 1.52 | 2.03 | 1.16 | 1.14 | 1275 | 1185 | 133 | 83 | 136 | 81 |
| 965 | 1.49 | 3.99 | 0.8  | 2.84 | 1.13 | 1.18 | 1676 | 1659 | 142 | 85 | 137 | 83 |
| 966 | 0.76 | 5.98 | 1.14 | 4.77 | 1.16 | 1.18 | 1348 | 1355 | 111 | 72 | 111 | 66 |
| 967 | 1.88 | 4.67 | 1.02 | 3.05 | 1.08 | 1.11 | 1186 | 1173 | 124 | 78 | 140 | 81 |
| 968 | 1.22 | 4.54 | 0.9  | 3.16 | 0.89 | 0.87 | 1241 | 1144 | 131 | 76 | 159 | 84 |
| 969 | 1.69 | 3.59 | 1.02 | 2.06 | 1.21 | 1.2  | 1548 | 1595 | 141 | 78 | 110 | 67 |
| 970 | 1.4  | 4.92 | 1.45 | 2.89 | 1.17 | 1.15 | 1672 | 1681 | 131 | 66 | 118 | 69 |
| 971 | 2.04 | 4.12 | 0.93 | 2.2  | 1.08 | 1.1  | 1478 | 1481 | 151 | 78 | 126 | 67 |
| 972 | 1.75 | 3.13 | 0.63 | 1.52 | 1.14 | 1.1  | 1467 | 1396 | 115 | 70 | 131 | 75 |
| 973 | 1.55 | 3.81 | 0.99 | 2.16 | 0.99 | 0.99 | 1272 | 1245 | 105 | 59 | 115 | 66 |
| 974 | 0.69 | 3.91 | 1.39 | 2.06 | 1.16 | 1.11 | 1866 | 1948 | 155 | 81 | 139 | 79 |
| 975 | 2.12 | 3.99 | 0.89 | 2.11 | 1.11 | 1.12 | 2269 | 2392 | 137 | 86 | 127 | 82 |
| 976 | 2.66 | 6.1  | 1.05 | 3.96 | 0.94 | 0.94 | 1288 | 1293 | 132 | 82 | 122 | 79 |
| 977 | 0.73 | 3.35 | 0.95 | 1.95 | 1.16 | 1.23 | 1843 | 1824 | 122 | 70 | 122 | 70 |
| 978 | 1.85 | 3.41 | 0.78 | 2.13 | 1.1  | 1.08 | 1087 | 1115 | 101 | 62 | 106 | 65 |
| 979 | 1.87 | 3.79 | 0.97 | 2.19 | 1.27 | 1.27 | 1519 | 1545 | 128 | 71 | 125 | 71 |
| 980 | 1.13 | 3.79 | 0.89 | 2.28 | 1.19 | 1.19 | 1293 | 1318 | 117 | 62 | 118 | 64 |
| 981 | 0.61 | 3.09 | 1    | 1.85 | 1.23 | 1.26 | 1734 | 1784 | 131 | 81 | 132 | 78 |
| 982 | 1.23 | 4.53 | 1.16 | 2.87 | 1.23 | 1.23 | 1443 | 1438 | 124 | 66 | 124 | 72 |
| 983 | 5.3  | 5.08 | 1.02 | 2.67 | 1.28 | 1.34 | 1655 | 1669 | 117 | 69 | 123 | 71 |
| 984 | 1.36 | 4.18 | 1.22 | 2.31 | 1.19 | 1.15 | 2322 | 2353 | 169 | 80 | 165 | 73 |
| 985 | 1.18 | 2.58 | 1.21 | 0.94 | 1.1  | 1.06 | 1798 | 1804 | 140 | 83 | 133 | 80 |
| 986 | 0.72 | 3.01 | 1.05 | 1.63 | 0.99 | 1.06 | 1220 | 1180 | 117 | 67 | 108 | 67 |
| 987 | 1.24 | 3.59 | 1.18 | 1.78 | 1.22 | 1.23 | 1465 | 1533 | 109 | 74 | 109 | 73 |

|      |       |      |      |      |      |      |      |      |     |    |     |    |
|------|-------|------|------|------|------|------|------|------|-----|----|-----|----|
| 988  | 0.7   | 4.89 | 1.26 | 2.88 | 1.13 | 1.18 | 2479 | 2443 | 129 | 68 | 125 | 63 |
| 989  | 1.16  | 4.39 | 1.05 | 2.55 | 1.25 | 1.23 | 1751 | 1772 | 147 | 82 | 149 | 84 |
| 990  | 2.2   | 4.71 | 1.08 | 2.52 | 1.09 | 0.98 | 1645 | 1859 | 125 | 59 | 115 | 54 |
| 991  | 1.65  | 2.5  | 0.72 | 1.52 | 1.33 | 1.44 | 1911 | 1889 | 120 | 68 | 132 | 70 |
| 992  | 1.75  | 2.99 | 0.72 | 1.54 | 1.17 | 1.19 | 1622 | 1631 | 124 | 75 | 126 | 76 |
| 993  | 0.84  | 3.79 | 0.82 | 2.45 | 1.2  | 1.27 | 1470 | 1576 | 131 | 78 | 131 | 75 |
| 994  | 1.05  | 4.18 | 1.06 | 2.61 | 1.13 | 1.21 | 1691 | 1649 | 130 | 77 | 130 | 74 |
| 995  | 1.17  | 4.89 | 1.1  | 3.26 | 0.96 | 0.94 | 1808 | 1770 | 173 | 99 | 147 | 98 |
| 996  | 7.35  | 6.52 | 1.26 | 2.89 | 1.1  | 1.13 | 1352 | 1292 | 115 | 79 | 115 | 80 |
| 997  | 2.19  | 4.56 | 0.99 | 2.58 | 1.09 | 1.14 | 2152 | 2057 | 139 | 87 | 133 | 84 |
| 998  | 1.75  | 3.84 | 1.17 | 2.06 | 1.22 | 1.28 | 1385 | 1355 | 120 | 64 | 116 | 70 |
| 999  | 1.55  | 3.15 | 1.02 | 1.41 | 1.07 | 1.12 | 1313 | 1278 | 116 | 72 | 121 | 76 |
| 1000 | 1.69  | 4.58 | 1.06 | 2.68 | 1.17 | 1.12 | 1895 | 1991 | 132 | 72 | 130 | 72 |
| 1001 | 2.05  | 4.53 | 0.97 | 2.68 | 1.14 | 1.16 | 2198 | 2166 | 170 | 94 | 170 | 92 |
| 1002 | 1.21  | 3.62 | 1.24 | 2.17 | 1.06 | 1.15 | 1337 | 1346 | 126 | 83 | 125 | 83 |
| 1003 | 1.23  | 2.99 | 0.93 | 1.59 | 1.14 | 1.11 | 1393 | 1408 | 113 | 76 | 114 | 78 |
| 1004 | 1.59  | 5.62 | 1.33 | 3.21 | 1.31 | 1.28 | 1851 | 1710 | 166 | 97 | 163 | 91 |
| 1005 | 1.34  | 4.04 | 0.93 | 2.65 | 1.13 | 1.14 | 1834 | 1938 | 160 | 79 | 158 | 86 |
| 1006 | 0.69  | 3.85 | 1.01 | 2.53 | 1.16 | 1.15 | 1200 | 1214 | 119 | 68 | 117 | 68 |
| 1007 | 1.28  | 2.81 | 0.98 | 1.32 | 1.23 | 1.29 | 1758 | 1707 | 133 | 70 | 126 | 69 |
| 1008 | 2.16  | 4.07 | 0.83 | 2.55 | 1.13 | 1.23 | 1343 | 1297 | 114 | 63 | 122 | 66 |
| 1009 | 1.68  | 4.41 | 0.79 | 2.66 | 1.32 | 1.66 | 2161 | 2118 | 108 | 63 | 144 | 74 |
| 1010 | 1.29  | 2.49 | 0.92 | 1.23 | 1.14 | 1.27 | 1406 | 1416 | 132 | 80 | 123 | 81 |
| 1011 | 0.64  | 3.47 | 1.47 | 1.62 | 0.98 | 1.02 | 1406 | 1399 | 122 | 67 | 119 | 63 |
| 1012 | 3.32  | 8.07 | 1.25 | 4.7  | 1.12 | 1.17 | 1407 | 1548 | 121 | 73 | 117 | 65 |
| 1013 | 0.65  | 6.53 | 3.26 | 2.57 | 1.13 | 1.2  | 2481 | 2491 | 140 | 79 | 142 | 76 |
| 1014 | 1.08  | 2.58 | 0.69 | 1.5  | 1.13 | 1.07 | 1680 | 1680 | 117 | 66 | 121 | 64 |
| 1015 | 1.84  | 3.62 | 0.76 | 2.04 | 1.16 | 1.19 | 1477 | 1458 | 116 | 75 | 118 | 73 |
| 1016 | 1.22  | 5.12 | 1.39 | 2.72 | 1.09 | 1.22 | 1758 | 1814 | 129 | 78 | 106 | 59 |
| 1017 | 2.16  | 4.05 | 1.23 | 2.09 | 1.39 | 1.28 | 1482 | 1415 | 126 | 77 | 127 | 73 |
| 1018 | 0.91  | 3.77 | 1.15 | 2.07 | 1.17 | 1.22 | 1682 | 1716 | 130 | 82 | 133 | 80 |
| 1019 | 1.49  | 3.93 | 0.94 | 2.4  | 1.11 | 1.05 | 1824 | 1778 | 172 | 95 | 163 | 93 |
| 1020 | 1.62  | 2.74 | 0.7  | 1.62 | 1.04 | 1.11 | 1408 | 1414 | 139 | 93 | 126 | 92 |
| 1021 | 12.96 | 6.8  | 0.99 | 1.93 | 1.2  | 1.13 | 1461 | 1448 | 124 | 70 | 113 | 60 |
| 1022 | 4.7   | 3.97 | 0.75 | 2.07 | 0.53 | 0.59 | 1468 | 746  | 133 | 68 | 132 | 65 |

Number CHD(1=Y, severity (1=IASBP IASBP $\geq$ 5 IASBP $\geq$ 1 IASBP $\geq$ 15mmHg (1=Yes, 2=No)

|    |   |   |     |   |   |   |
|----|---|---|-----|---|---|---|
| 1  | 0 | 1 | 1   | 2 | 2 | 2 |
| 2  | 0 | 1 | 5   | 1 | 2 | 2 |
| 3  | 1 | 3 | 1   | 2 | 2 | 2 |
| 4  | 1 | 2 | -1  | 2 | 2 | 2 |
| 5  | 1 | 4 | 0   | 2 | 2 | 2 |
| 6  | 1 | 4 | -6  | 1 | 2 | 2 |
| 7  | 0 | 1 | -8  | 1 | 2 | 2 |
| 8  | 1 | 4 | -4  | 2 | 2 | 2 |
| 9  | 1 | 4 | -12 | 1 | 1 | 2 |
| 10 | 1 | 4 | 4   | 2 | 2 | 2 |
| 11 | 1 | 3 | -6  | 1 | 2 | 2 |
| 12 | 1 | 3 | 8   | 1 | 2 | 2 |
| 13 | 1 | 3 | 0   | 2 | 2 | 2 |
| 14 | 1 | 3 | 0   | 2 | 2 | 2 |
| 15 | 1 | 4 | -3  | 2 | 2 | 2 |
| 16 | 1 | 2 | 2   | 2 | 2 | 2 |
| 17 | 0 | 1 | 0   | 2 | 2 | 2 |
| 18 | 1 | 4 | 4   | 2 | 2 | 2 |
| 19 | 0 | 1 | -3  | 2 | 2 | 2 |
| 20 | 1 | 4 | 0   | 2 | 2 | 2 |
| 21 | 1 | 4 | -9  | 1 | 2 | 2 |
| 22 | 0 | 1 | 1   | 2 | 2 | 2 |
| 23 | 0 | 1 | -4  | 2 | 2 | 2 |
| 24 | 1 | 3 | 6   | 1 | 2 | 2 |
| 25 | 1 | 3 | -1  | 2 | 2 | 2 |
| 26 | 0 | 1 | 10  | 1 | 1 | 2 |
| 27 | 1 | 3 | -2  | 2 | 2 | 2 |
| 28 | 0 | 0 | 0   | 2 | 2 | 2 |
| 29 | 1 | 3 | 3   | 2 | 2 | 2 |
| 30 | 1 | 3 | 3   | 2 | 2 | 2 |
| 31 | 1 | 4 | 8   | 1 | 2 | 2 |
| 32 | 1 | 4 | 5   | 1 | 2 | 2 |
| 33 | 1 | 4 | 7   | 1 | 2 | 2 |
| 34 | 1 | 3 | 8   | 1 | 2 | 2 |
| 35 | 0 | 1 | 6   | 1 | 2 | 2 |
| 36 | 0 | 1 | 1   | 2 | 2 | 2 |
| 37 | 1 | 4 | -6  | 1 | 2 | 2 |

|    |   |   |     |   |   |   |
|----|---|---|-----|---|---|---|
| 38 | 1 | 3 | -6  | 1 | 2 | 2 |
| 39 | 1 | 4 | 4   | 2 | 2 | 2 |
| 40 | 1 | 2 | 4   | 2 | 2 | 2 |
| 41 | 1 | 4 | -2  | 2 | 2 | 2 |
| 42 | 1 | 3 | -8  | 1 | 2 | 2 |
| 43 | 1 | 1 | 2   | 2 | 2 | 2 |
| 44 | 0 | 1 | -4  | 2 | 2 | 2 |
| 45 | 0 | 1 | 6   | 1 | 2 | 2 |
| 46 | 1 | 4 | 0   | 2 | 2 | 2 |
| 47 | 1 | 4 | 0   | 2 | 2 | 2 |
| 48 | 1 | 3 | 5   | 1 | 2 | 2 |
| 49 | 1 | 4 | -4  | 2 | 2 | 2 |
| 50 | 1 | 4 | 5   | 1 | 2 | 2 |
| 51 | 1 | 4 | 1   | 2 | 2 | 2 |
| 52 | 1 | 4 | -2  | 2 | 2 | 2 |
| 53 | 1 | 4 | 0   | 2 | 2 | 2 |
| 54 | 0 | 1 | 2   | 2 | 2 | 2 |
| 55 | 0 | 1 | 7   | 1 | 2 | 2 |
| 56 | 0 | 0 | -4  | 2 | 2 | 2 |
| 57 | 1 | 2 | 3   | 2 | 2 | 2 |
| 58 | 1 | 2 | 3   | 2 | 2 | 2 |
| 59 | 1 | 3 | -2  | 2 | 2 | 2 |
| 60 | 1 | 3 | -5  | 1 | 2 | 2 |
| 61 | 1 | 4 | 0   | 2 | 2 | 2 |
| 62 | 0 | 1 | -2  | 2 | 2 | 2 |
| 63 | 1 | 4 | -3  | 2 | 2 | 2 |
| 64 | 1 | 3 | -13 | 1 | 1 | 2 |
| 65 | 1 | 4 | -7  | 1 | 2 | 2 |
| 66 | 1 | 4 | -1  | 2 | 2 | 2 |
| 67 | 0 | 1 | 10  | 1 | 1 | 2 |
| 68 | 1 | 4 | -3  | 2 | 2 | 2 |
| 69 | 1 | 4 | 3   | 2 | 2 | 2 |
| 70 | 1 | 3 | 8   | 1 | 2 | 2 |
| 71 | 0 | 1 | 0   | 2 | 2 | 2 |
| 72 | 1 | 3 | 0   | 2 | 2 | 2 |
| 73 | 1 | 4 | -6  | 1 | 2 | 2 |
| 74 | 1 | 2 | -2  | 2 | 2 | 2 |
| 75 | 1 | 3 | -4  | 2 | 2 | 2 |

|     |   |   |     |   |   |   |
|-----|---|---|-----|---|---|---|
| 76  | 1 | 4 | 8   | 1 | 2 | 2 |
| 77  | 0 | 1 | 4   | 2 | 2 | 2 |
| 78  | 1 | 2 | 1   | 2 | 2 | 2 |
| 79  | 1 | 4 | -8  | 1 | 2 | 2 |
| 80  | 0 | 1 | 0   | 2 | 2 | 2 |
| 81  | 1 | 3 | 5   | 1 | 2 | 2 |
| 82  | 1 | 4 | -1  | 2 | 2 | 2 |
| 83  | 0 | 1 | -7  | 1 | 2 | 2 |
| 84  | 1 | 3 | 0   | 2 | 2 | 2 |
| 85  | 1 | 2 | -4  | 2 | 2 | 2 |
| 86  | 1 | 3 | 5   | 1 | 2 | 2 |
| 87  | 0 | 1 | -18 | 1 | 1 | 1 |
| 88  | 1 | 3 | -4  | 2 | 2 | 2 |
| 89  | 0 | 1 | -8  | 1 | 2 | 2 |
| 90  | 1 | 4 | -8  | 1 | 2 | 2 |
| 91  | 1 | 4 | -2  | 2 | 2 | 2 |
| 92  | 1 | 3 | -4  | 2 | 2 | 2 |
| 93  | 1 | 4 | -5  | 1 | 2 | 2 |
| 94  | 1 | 3 | 7   | 1 | 2 | 2 |
| 95  | 1 | 4 | 3   | 2 | 2 | 2 |
| 96  | 1 | 4 | 4   | 2 | 2 | 2 |
| 97  | 1 | 4 | -4  | 2 | 2 | 2 |
| 98  | 1 | 3 | 6   | 1 | 2 | 2 |
| 99  | 1 | 4 | 5   | 1 | 2 | 2 |
| 100 | 1 | 4 | -5  | 1 | 2 | 2 |
| 101 | 1 | 3 | -6  | 1 | 2 | 2 |
| 102 | 1 | 3 | 0   | 2 | 2 | 2 |
| 103 | 1 | 3 | -1  | 2 | 2 | 2 |
| 104 | 1 | 3 | -1  | 2 | 2 | 2 |
| 105 | 1 | 4 | -13 | 1 | 1 | 2 |
| 106 | 0 | 1 | -3  | 2 | 2 | 2 |
| 107 | 1 | 3 | 2   | 2 | 2 | 2 |
| 108 | 1 | 4 | -6  | 1 | 2 | 2 |
| 109 | 1 | 4 | 2   | 2 | 2 | 2 |
| 110 | 1 | 4 | -9  | 1 | 2 | 2 |
| 111 | 1 | 3 | 2   | 2 | 2 | 2 |
| 112 | 1 | 4 | -2  | 2 | 2 | 2 |
| 113 | 1 | 4 | 3   | 2 | 2 | 2 |



|     |   |   |     |   |   |   |
|-----|---|---|-----|---|---|---|
| 114 | 0 | 1 | -2  | 2 | 2 | 2 |
| 115 | 1 | 3 | 1   | 2 | 2 | 2 |
| 116 | 1 | 2 | -1  | 2 | 2 | 2 |
| 117 | 0 | 1 | 2   | 2 | 2 | 2 |
| 118 | 0 | 1 | 0   | 2 | 2 | 2 |
| 119 | 1 | 4 | 2   | 2 | 2 | 2 |
| 120 | 1 | 4 | -3  | 2 | 2 | 2 |
| 121 | 1 | 4 | -15 | 1 | 1 | 1 |
| 122 | 1 | 4 | 4   | 2 | 2 | 2 |
| 123 | 1 | 4 | -1  | 2 | 2 | 2 |
| 124 | 1 | 4 | -3  | 2 | 2 | 2 |
| 125 | 1 | 4 | -3  | 2 | 2 | 2 |
| 126 | 1 | 3 | -1  | 2 | 2 | 2 |
| 127 | 1 | 4 | 2   | 2 | 2 | 2 |
| 128 | 1 | 4 | 5   | 1 | 2 | 2 |
| 129 | 1 | 4 | 0   | 2 | 2 | 2 |
| 130 | 0 | 1 | -3  | 2 | 2 | 2 |
| 131 | 1 | 3 | 2   | 2 | 2 | 2 |
| 132 | 1 | 3 | -3  | 2 | 2 | 2 |
| 133 | 0 | 1 | -3  | 2 | 2 | 2 |
| 134 | 0 | 1 | 7   | 1 | 2 | 2 |
| 135 | 1 | 2 | -1  | 2 | 2 | 2 |
| 136 | 1 | 4 | 3   | 2 | 2 | 2 |
| 137 | 0 | 1 | -4  | 2 | 2 | 2 |
| 138 | 1 | 4 | -6  | 1 | 2 | 2 |
| 139 | 0 | 1 | 1   | 2 | 2 | 2 |
| 140 | 1 | 3 | 5   | 1 | 2 | 2 |
| 141 | 0 | 1 | -3  | 2 | 2 | 2 |
| 142 | 1 | 4 | 1   | 2 | 2 | 2 |
| 143 | 1 | 4 | 4   | 2 | 2 | 2 |
| 144 | 0 | 1 | -7  | 1 | 2 | 2 |
| 145 | 1 | 4 | -6  | 1 | 2 | 2 |
| 146 | 1 | 3 | -5  | 1 | 2 | 2 |
| 147 | 1 | 2 | -2  | 2 | 2 | 2 |
| 148 | 1 | 3 | -1  | 2 | 2 | 2 |
| 149 | 0 | 1 | 1   | 2 | 2 | 2 |
| 150 | 0 | 1 | 7   | 1 | 2 | 2 |
| 151 | 0 | 1 | -1  | 2 | 2 | 2 |

|     |   |   |     |   |   |   |
|-----|---|---|-----|---|---|---|
| 152 | 1 | 4 | -1  | 2 | 2 | 2 |
| 153 | 1 | 4 | 5   | 1 | 2 | 2 |
| 154 | 0 | 1 | 3   | 2 | 2 | 2 |
| 155 | 1 | 3 | -7  | 1 | 2 | 2 |
| 156 | 1 | 4 | 0   | 2 | 2 | 2 |
| 157 | 1 | 4 | -4  | 2 | 2 | 2 |
| 158 | 1 | 3 | 1   | 2 | 2 | 2 |
| 159 | 1 | 3 | -6  | 1 | 2 | 2 |
| 160 | 1 | 4 | -4  | 2 | 2 | 2 |
| 161 | 1 | 3 | 0   | 2 | 2 | 2 |
| 162 | 1 | 3 | -11 | 1 | 1 | 2 |
| 163 | 0 | 1 | 1   | 2 | 2 | 2 |
| 164 | 1 | 4 | 0   | 2 | 2 | 2 |
| 165 | 1 | 4 | 3   | 2 | 2 | 2 |
| 166 | 1 | 4 | -5  | 1 | 2 | 2 |
| 167 | 0 | 1 | 3   | 2 | 2 | 2 |
| 168 | 0 | 1 | 1   | 2 | 2 | 2 |
| 169 | 1 | 4 | 4   | 2 | 2 | 2 |
| 170 | 1 | 3 | 6   | 1 | 2 | 2 |
| 171 | 1 | 3 | -2  | 2 | 2 | 2 |
| 172 | 0 | 1 | -5  | 1 | 2 | 2 |
| 173 | 1 | 3 | 11  | 1 | 1 | 2 |
| 174 | 1 | 3 | -11 | 1 | 1 | 2 |
| 175 | 1 | 4 | -7  | 1 | 2 | 2 |
| 176 | 1 | 4 | -21 | 1 | 1 | 1 |
| 177 | 1 | 4 | 2   | 2 | 2 | 2 |
| 178 | 0 | 1 | -9  | 1 | 2 | 2 |
| 179 | 1 | 3 | 4   | 2 | 2 | 2 |
| 180 | 1 | 4 | -2  | 2 | 2 | 2 |
| 181 | 1 | 4 | 0   | 2 | 2 | 2 |
| 182 | 1 | 3 | -1  | 2 | 2 | 2 |
| 183 | 0 | 1 | 6   | 1 | 2 | 2 |
| 184 | 1 | 4 | 11  | 1 | 1 | 2 |
| 185 | 0 | 1 | 0   | 2 | 2 | 2 |
| 186 | 1 | 3 | 3   | 2 | 2 | 2 |
| 187 | 1 | 4 | -3  | 2 | 2 | 2 |
| 188 | 1 | 3 | 1   | 2 | 2 | 2 |
| 189 | 0 | 1 | -2  | 2 | 2 | 2 |

|     |   |   |    |   |   |   |
|-----|---|---|----|---|---|---|
| 190 | 1 | 4 | 4  | 2 | 2 | 2 |
| 191 | 1 | 4 | -6 | 1 | 2 | 2 |
| 192 | 1 | 4 | 3  | 2 | 2 | 2 |
| 193 | 1 | 3 | -3 | 2 | 2 | 2 |
| 194 | 1 | 4 | 1  | 2 | 2 | 2 |
| 195 | 0 | 1 | 0  | 2 | 2 | 2 |
| 196 | 1 | 4 | -4 | 2 | 2 | 2 |
| 197 | 1 | 3 | 3  | 2 | 2 | 2 |
| 198 | 1 | 4 | 0  | 2 | 2 | 2 |
| 199 | 0 | 1 | 1  | 2 | 2 | 2 |
| 200 | 1 | 4 | 4  | 2 | 2 | 2 |
| 201 | 0 | 1 | 1  | 2 | 2 | 2 |
| 202 | 1 | 4 | 9  | 1 | 2 | 2 |
| 203 | 0 | 1 | 2  | 2 | 2 | 2 |
| 204 | 1 | 4 | 0  | 2 | 2 | 2 |
| 205 | 1 | 3 | -2 | 2 | 2 | 2 |
| 206 | 1 | 2 | -1 | 2 | 2 | 2 |
| 207 | 1 | 4 | 1  | 2 | 2 | 2 |
| 208 | 1 | 3 | -7 | 1 | 2 | 2 |
| 209 | 1 | 4 | 2  | 2 | 2 | 2 |
| 210 | 1 | 3 | -2 | 2 | 2 | 2 |
| 211 | 1 | 4 | 0  | 2 | 2 | 2 |
| 212 | 0 | 0 | -1 | 2 | 2 | 2 |
| 213 | 1 | 4 | 2  | 2 | 2 | 2 |
| 214 | 1 | 4 | -1 | 2 | 2 | 2 |
| 215 | 1 | 4 | 2  | 2 | 2 | 2 |
| 216 | 0 | 1 | 0  | 2 | 2 | 2 |
| 217 | 1 | 4 | 6  | 1 | 2 | 2 |
| 218 | 0 | 0 | 3  | 2 | 2 | 2 |
| 219 | 1 | 3 | 16 | 1 | 1 | 1 |
| 220 | 1 | 4 | 8  | 1 | 2 | 2 |
| 221 | 1 | 4 | -2 | 2 | 2 | 2 |
| 222 | 1 | 3 | -5 | 1 | 2 | 2 |
| 223 | 1 | 4 | 1  | 2 | 2 | 2 |
| 224 | 1 | 2 | 4  | 2 | 2 | 2 |
| 225 | 1 | 3 | -7 | 1 | 2 | 2 |
| 226 | 1 | 2 | 1  | 2 | 2 | 2 |
| 227 | 1 | 3 | 35 | 1 | 1 | 1 |

|     |   |   |    |   |   |   |
|-----|---|---|----|---|---|---|
| 228 | 1 | 2 | 1  | 2 | 2 | 2 |
| 229 | 1 | 3 | 7  | 1 | 2 | 2 |
| 230 | 1 | 3 | 1  | 2 | 2 | 2 |
| 231 | 1 | 4 | 2  | 2 | 2 | 2 |
| 232 | 1 | 3 | 2  | 2 | 2 | 2 |
| 233 | 0 | 1 | 4  | 2 | 2 | 2 |
| 234 | 0 | 0 | -2 | 2 | 2 | 2 |
| 235 | 0 | 0 | 2  | 2 | 2 | 2 |
| 236 | 0 | 0 | 5  | 1 | 2 | 2 |
| 237 | 0 | 1 | -2 | 2 | 2 | 2 |
| 238 | 0 | 1 | 1  | 2 | 2 | 2 |
| 239 | 0 | 1 | 2  | 2 | 2 | 2 |
| 240 | 0 | 0 | -1 | 2 | 2 | 2 |
| 241 | 0 | 1 | -8 | 1 | 2 | 2 |
| 242 | 1 | 3 | -3 | 2 | 2 | 2 |
| 243 | 1 | 4 | 6  | 1 | 2 | 2 |
| 244 | 1 | 4 | -4 | 2 | 2 | 2 |
| 245 | 1 | 4 | -9 | 1 | 2 | 2 |
| 246 | 1 | 3 | 3  | 2 | 2 | 2 |
| 247 | 1 | 2 | -6 | 1 | 2 | 2 |
| 248 | 1 | 4 | 2  | 2 | 2 | 2 |
| 249 | 1 | 3 | -1 | 2 | 2 | 2 |
| 250 | 1 | 3 | 0  | 2 | 2 | 2 |
| 251 | 1 | 4 | -9 | 1 | 2 | 2 |
| 252 | 1 | 4 | -2 | 2 | 2 | 2 |
| 253 | 1 | 3 | 1  | 2 | 2 | 2 |
| 254 | 1 | 4 | -8 | 1 | 2 | 2 |
| 255 | 1 | 4 | -1 | 2 | 2 | 2 |
| 256 | 1 | 4 | -2 | 2 | 2 | 2 |
| 257 | 0 | 1 | 5  | 1 | 2 | 2 |
| 258 | 1 | 4 | -2 | 2 | 2 | 2 |
| 259 | 1 | 4 | 0  | 2 | 2 | 2 |
| 260 | 1 | 3 | 3  | 2 | 2 | 2 |
| 261 | 1 | 4 | 5  | 1 | 2 | 2 |
| 262 | 1 | 4 | -6 | 1 | 2 | 2 |
| 263 | 1 | 4 | 2  | 2 | 2 | 2 |
| 264 | 1 | 3 | -1 | 2 | 2 | 2 |
| 265 | 1 | 4 | -2 | 2 | 2 | 2 |

|     |   |   |     |   |   |   |
|-----|---|---|-----|---|---|---|
| 266 | 1 | 4 | 0   | 2 | 2 | 2 |
| 267 | 1 | 4 | 2   | 2 | 2 | 2 |
| 268 | 1 | 4 | -1  | 2 | 2 | 2 |
| 269 | 1 | 4 | 1   | 2 | 2 | 2 |
| 270 | 1 | 4 | -11 | 1 | 1 | 2 |
| 271 | 1 | 4 | 1   | 2 | 2 | 2 |
| 272 | 1 | 4 | 2   | 2 | 2 | 2 |
| 273 | 1 | 3 | 3   | 2 | 2 | 2 |
| 274 | 1 | 3 | -10 | 1 | 1 | 2 |
| 275 | 1 | 2 | -2  | 2 | 2 | 2 |
| 276 | 1 | 2 | 1   | 2 | 2 | 2 |
| 277 | 0 | 1 | 4   | 2 | 2 | 2 |
| 278 | 1 | 2 | 0   | 2 | 2 | 2 |
| 279 | 0 | 1 | 1   | 2 | 2 | 2 |
| 280 | 1 | 4 | 1   | 2 | 2 | 2 |
| 281 | 1 | 4 | 0   | 2 | 2 | 2 |
| 282 | 1 | 4 | -25 | 1 | 1 | 1 |
| 283 | 1 | 3 | 1   | 2 | 2 | 2 |
| 284 | 1 | 3 | -5  | 1 | 2 | 2 |
| 285 | 1 | 2 | 4   | 2 | 2 | 2 |
| 286 | 1 | 4 | 8   | 1 | 2 | 2 |
| 287 | 1 | 4 | 3   | 2 | 2 | 2 |
| 288 | 0 | 1 | -8  | 1 | 2 | 2 |
| 289 | 1 | 4 | -5  | 1 | 2 | 2 |
| 290 | 1 | 4 | 1   | 2 | 2 | 2 |
| 291 | 1 | 3 | 0   | 2 | 2 | 2 |
| 292 | 1 | 3 | 2   | 2 | 2 | 2 |
| 293 | 1 | 3 | -5  | 1 | 2 | 2 |
| 294 | 1 | 3 | -8  | 1 | 2 | 2 |
| 295 | 1 | 4 | 2   | 2 | 2 | 2 |
| 296 | 1 | 2 | 1   | 2 | 2 | 2 |
| 297 | 1 | 4 | 24  | 1 | 1 | 1 |
| 298 | 1 | 4 | 2   | 2 | 2 | 2 |
| 299 | 1 | 2 | -2  | 2 | 2 | 2 |
| 300 | 1 | 4 | 15  | 1 | 1 | 1 |
| 301 | 0 | 1 | -5  | 1 | 2 | 2 |
| 302 | 1 | 3 | -5  | 1 | 2 | 2 |
| 303 | 0 | 1 | 2   | 2 | 2 | 2 |

|     |   |   |     |   |   |   |
|-----|---|---|-----|---|---|---|
| 304 | 1 | 2 | 6   | 1 | 2 | 2 |
| 305 | 0 | 1 | -2  | 2 | 2 | 2 |
| 306 | 1 | 2 | -2  | 2 | 2 | 2 |
| 307 | 0 | 1 | 1   | 2 | 2 | 2 |
| 308 | 0 | 1 | 3   | 2 | 2 | 2 |
| 309 | 0 | 1 | 3   | 2 | 2 | 2 |
| 310 | 0 | 1 | 1   | 2 | 2 | 2 |
| 311 | 0 | 1 | 0   | 2 | 2 | 2 |
| 312 | 1 | 2 | -19 | 1 | 1 | 1 |
| 313 | 0 | 1 | -6  | 1 | 2 | 2 |
| 314 | 0 | 1 | 0   | 2 | 2 | 2 |
| 315 | 0 | 1 | -5  | 1 | 2 | 2 |
| 316 | 0 | 1 | 1   | 2 | 2 | 2 |
| 317 | 0 | 1 | 2   | 2 | 2 | 2 |
| 318 | 0 | 1 | -2  | 2 | 2 | 2 |
| 319 | 0 | 1 | 5   | 1 | 2 | 2 |
| 320 | 0 | 1 | -1  | 2 | 2 | 2 |
| 321 | 0 | 1 | 1   | 2 | 2 | 2 |
| 322 | 0 | 1 | 2   | 2 | 2 | 2 |
| 323 | 0 | 1 | -1  | 2 | 2 | 2 |
| 324 | 0 | 1 | 1   | 2 | 2 | 2 |
| 325 | 0 | 1 | 3   | 2 | 2 | 2 |
| 326 | 0 | 1 | 1   | 2 | 2 | 2 |
| 327 | 0 | 1 | 8   | 1 | 2 | 2 |
| 328 | 0 | 1 | -7  | 1 | 2 | 2 |
| 329 | 0 | 1 | -4  | 2 | 2 | 2 |
| 330 | 0 | 1 | 1   | 2 | 2 | 2 |
| 331 | 0 | 1 | 21  | 1 | 1 | 1 |
| 332 | 0 | 1 | -2  | 2 | 2 | 2 |
| 333 | 0 | 1 | 2   | 2 | 2 | 2 |
| 334 | 0 | 1 | 5   | 1 | 2 | 2 |
| 335 | 0 | 1 | 0   | 2 | 2 | 2 |
| 336 | 0 | 1 | -2  | 2 | 2 | 2 |
| 337 | 0 | 1 | 0   | 2 | 2 | 2 |
| 338 | 0 | 1 | -1  | 2 | 2 | 2 |
| 339 | 0 | 1 | -3  | 2 | 2 | 2 |
| 340 | 0 | 1 | -1  | 2 | 2 | 2 |
| 341 | 0 | 0 | -6  | 1 | 2 | 2 |

|     |   |   |     |   |   |   |
|-----|---|---|-----|---|---|---|
| 342 | 1 | 4 | -3  | 2 | 2 | 2 |
| 343 | 1 | 4 | -8  | 1 | 2 | 2 |
| 344 | 1 | 4 | 2   | 2 | 2 | 2 |
| 345 | 0 | 1 | -2  | 2 | 2 | 2 |
| 346 | 1 | 3 | 2   | 2 | 2 | 2 |
| 347 | 1 | 4 | 5   | 1 | 2 | 2 |
| 348 | 1 | 4 | 6   | 1 | 2 | 2 |
| 349 | 1 | 3 | 2   | 2 | 2 | 2 |
| 350 | 1 | 2 | 2   | 2 | 2 | 2 |
| 351 | 1 | 4 | -4  | 2 | 2 | 2 |
| 352 | 1 | 4 | -1  | 2 | 2 | 2 |
| 353 | 1 | 4 | 5   | 1 | 2 | 2 |
| 354 | 1 | 4 | -6  | 1 | 2 | 2 |
| 355 | 1 | 4 | -1  | 2 | 2 | 2 |
| 356 | 0 | 1 | -10 | 1 | 1 | 2 |
| 357 | 0 | 1 | 1   | 2 | 2 | 2 |
| 358 | 1 | 4 | -3  | 2 | 2 | 2 |
| 359 | 1 | 4 | -5  | 1 | 2 | 2 |
| 360 | 1 | 3 | -5  | 1 | 2 | 2 |
| 361 | 1 | 4 | 8   | 1 | 2 | 2 |
| 362 | 1 | 2 | -1  | 2 | 2 | 2 |
| 363 | 1 | 3 | -4  | 2 | 2 | 2 |
| 364 | 1 | 4 | -5  | 1 | 2 | 2 |
| 365 | 1 | 2 | -1  | 2 | 2 | 2 |
| 366 | 1 | 4 | 5   | 1 | 2 | 2 |
| 367 | 1 | 3 | -1  | 2 | 2 | 2 |
| 368 | 1 | 4 | -7  | 1 | 2 | 2 |
| 369 | 1 | 2 | -1  | 2 | 2 | 2 |
| 370 | 1 | 3 | -1  | 2 | 2 | 2 |
| 371 | 1 | 3 | -3  | 2 | 2 | 2 |
| 372 | 1 | 4 | -4  | 2 | 2 | 2 |
| 373 | 1 | 4 | -20 | 1 | 1 | 1 |
| 374 | 1 | 4 | 11  | 1 | 1 | 2 |
| 375 | 1 | 4 | -1  | 2 | 2 | 2 |
| 376 | 1 | 4 | -8  | 1 | 2 | 2 |
| 377 | 1 | 4 | 0   | 2 | 2 | 2 |
| 378 | 1 | 4 | 2   | 2 | 2 | 2 |
| 379 | 1 | 4 | -2  | 2 | 2 | 2 |

|     |   |   |    |   |   |   |
|-----|---|---|----|---|---|---|
| 380 | 1 | 3 | -4 | 2 | 2 | 2 |
| 381 | 1 | 4 | 1  | 2 | 2 | 2 |
| 382 | 1 | 2 | -6 | 1 | 2 | 2 |
| 383 | 1 | 4 | 3  | 2 | 2 | 2 |
| 384 | 1 | 3 | 0  | 2 | 2 | 2 |
| 385 | 1 | 1 | -2 | 2 | 2 | 2 |
| 386 | 1 | 4 | 6  | 1 | 2 | 2 |
| 387 | 1 | 4 | 0  | 2 | 2 | 2 |
| 388 | 1 | 4 | -3 | 2 | 2 | 2 |
| 389 | 1 | 3 | -3 | 2 | 2 | 2 |
| 390 | 1 | 2 | 0  | 2 | 2 | 2 |
| 391 | 1 | 4 | 4  | 2 | 2 | 2 |
| 392 | 1 | 3 | 22 | 1 | 1 | 1 |
| 393 | 1 | 3 | -6 | 1 | 2 | 2 |
| 394 | 1 | 3 | -8 | 1 | 2 | 2 |
| 395 | 1 | 2 | 9  | 1 | 2 | 2 |
| 396 | 1 | 3 | -1 | 2 | 2 | 2 |
| 397 | 1 | 3 | -2 | 2 | 2 | 2 |
| 398 | 1 | 3 | -3 | 2 | 2 | 2 |
| 399 | 1 | 4 | 3  | 2 | 2 | 2 |
| 400 | 1 | 4 | 1  | 2 | 2 | 2 |
| 401 | 1 | 4 | 5  | 1 | 2 | 2 |
| 402 | 1 | 4 | 6  | 1 | 2 | 2 |
| 403 | 1 | 2 | 2  | 2 | 2 | 2 |
| 404 | 0 | 1 | 5  | 1 | 2 | 2 |
| 405 | 1 | 4 | -1 | 2 | 2 | 2 |
| 406 | 1 | 4 | -3 | 2 | 2 | 2 |
| 407 | 1 | 4 | 2  | 2 | 2 | 2 |
| 408 | 1 | 4 | 0  | 2 | 2 | 2 |
| 409 | 1 | 4 | -2 | 2 | 2 | 2 |
| 410 | 1 | 4 | 2  | 2 | 2 | 2 |
| 411 | 1 | 2 | -1 | 2 | 2 | 2 |
| 412 | 1 | 4 | 4  | 2 | 2 | 2 |
| 413 | 1 | 3 | 2  | 2 | 2 | 2 |
| 414 | 1 | 4 | 2  | 2 | 2 | 2 |
| 415 | 0 | 1 | 1  | 2 | 2 | 2 |
| 416 | 1 | 3 | -1 | 2 | 2 | 2 |
| 417 | 1 | 2 | 4  | 2 | 2 | 2 |



|     |   |   |    |   |   |   |
|-----|---|---|----|---|---|---|
| 418 | 1 | 4 | -1 | 2 | 2 | 2 |
| 419 | 1 | 3 | 0  | 2 | 2 | 2 |
| 420 | 1 | 4 | 8  | 1 | 2 | 2 |
| 421 | 1 | 3 | 5  | 1 | 2 | 2 |
| 422 | 1 | 4 | 7  | 1 | 2 | 2 |
| 423 | 1 | 3 | 1  | 2 | 2 | 2 |
| 424 | 1 | 3 | -9 | 1 | 2 | 2 |
| 425 | 1 | 3 | 4  | 2 | 2 | 2 |
| 426 | 1 | 4 | 4  | 2 | 2 | 2 |
| 427 | 1 | 4 | -2 | 2 | 2 | 2 |
| 428 | 1 | 4 | -3 | 2 | 2 | 2 |
| 429 | 1 | 4 | 2  | 2 | 2 | 2 |
| 430 | 1 | 3 | 9  | 1 | 2 | 2 |
| 431 | 1 | 3 | -1 | 2 | 2 | 2 |
| 432 | 1 | 3 | 5  | 1 | 2 | 2 |
| 433 | 1 | 3 | 2  | 2 | 2 | 2 |
| 434 | 1 | 3 | -1 | 2 | 2 | 2 |
| 435 | 1 | 4 | 0  | 2 | 2 | 2 |
| 436 | 1 | 3 | -4 | 2 | 2 | 2 |
| 437 | 1 | 3 | 4  | 2 | 2 | 2 |
| 438 | 1 | 3 | 1  | 2 | 2 | 2 |
| 439 | 1 | 4 | 0  | 2 | 2 | 2 |
| 440 | 1 | 4 | 10 | 1 | 1 | 2 |
| 441 | 1 | 4 | -2 | 2 | 2 | 2 |
| 442 | 1 | 3 | -2 | 2 | 2 | 2 |
| 443 | 1 | 4 | 2  | 2 | 2 | 2 |
| 444 | 1 | 3 | -5 | 1 | 2 | 2 |
| 445 | 1 | 4 | 0  | 2 | 2 | 2 |
| 446 | 1 | 4 | 1  | 2 | 2 | 2 |
| 447 | 1 | 4 | -6 | 1 | 2 | 2 |
| 448 | 1 | 4 | -1 | 2 | 2 | 2 |
| 449 | 1 | 3 | -4 | 2 | 2 | 2 |
| 450 | 1 | 3 | -1 | 2 | 2 | 2 |
| 451 | 1 | 3 | -7 | 1 | 2 | 2 |
| 452 | 1 | 4 | -6 | 1 | 2 | 2 |
| 453 | 0 | 1 | -1 | 2 | 2 | 2 |
| 454 | 1 | 4 | -4 | 2 | 2 | 2 |
| 455 | 1 | 3 | -2 | 2 | 2 | 2 |

|     |   |   |     |   |   |   |
|-----|---|---|-----|---|---|---|
| 456 | 1 | 4 | -4  | 2 | 2 | 2 |
| 457 | 1 | 2 | 1   | 2 | 2 | 2 |
| 458 | 1 | 3 | 4   | 2 | 2 | 2 |
| 459 | 1 | 3 | 2   | 2 | 2 | 2 |
| 460 | 1 | 4 | 2   | 2 | 2 | 2 |
| 461 | 1 | 4 | -2  | 2 | 2 | 2 |
| 462 | 1 | 2 | 3   | 2 | 2 | 2 |
| 463 | 1 | 3 | -4  | 2 | 2 | 2 |
| 464 | 1 | 3 | 2   | 2 | 2 | 2 |
| 465 | 1 | 3 | -1  | 2 | 2 | 2 |
| 466 | 1 | 4 | 0   | 2 | 2 | 2 |
| 467 | 1 | 3 | 2   | 2 | 2 | 2 |
| 468 | 1 | 4 | -4  | 2 | 2 | 2 |
| 469 | 1 | 3 | 0   | 2 | 2 | 2 |
| 470 | 1 | 3 | 7   | 1 | 2 | 2 |
| 471 | 1 | 3 | 7   | 1 | 2 | 2 |
| 472 | 1 | 3 | 0   | 2 | 2 | 2 |
| 473 | 1 | 4 | -5  | 1 | 2 | 2 |
| 474 | 1 | 3 | 1   | 2 | 2 | 2 |
| 475 | 1 | 3 | 5   | 1 | 2 | 2 |
| 476 | 1 | 3 | -2  | 2 | 2 | 2 |
| 477 | 1 | 3 | -1  | 2 | 2 | 2 |
| 478 | 1 | 3 | 12  | 1 | 1 | 2 |
| 479 | 1 | 4 | -4  | 2 | 2 | 2 |
| 480 | 1 | 4 | 13  | 1 | 1 | 2 |
| 481 | 1 | 4 | -12 | 1 | 1 | 2 |
| 482 | 1 | 3 | 5   | 1 | 2 | 2 |
| 483 | 1 | 4 | 2   | 2 | 2 | 2 |
| 484 | 1 | 4 | 19  | 1 | 1 | 1 |
| 485 | 1 | 3 | 5   | 1 | 2 | 2 |
| 486 | 0 | 1 | 0   | 2 | 2 | 2 |
| 487 | 0 | 1 | 1   | 2 | 2 | 2 |
| 488 | 0 | 1 | 3   | 2 | 2 | 2 |
| 489 | 0 | 1 | -2  | 2 | 2 | 2 |
| 490 | 0 | 1 | 2   | 2 | 2 | 2 |
| 491 | 0 | 1 | -2  | 2 | 2 | 2 |
| 492 | 0 | 1 | -6  | 1 | 2 | 2 |
| 493 | 0 | 0 | -4  | 2 | 2 | 2 |

|     |   |   |    |   |   |   |
|-----|---|---|----|---|---|---|
| 494 | 0 | 1 | 2  | 2 | 2 | 2 |
| 495 | 0 | 1 | 7  | 1 | 2 | 2 |
| 496 | 0 | 1 | -3 | 2 | 2 | 2 |
| 497 | 0 | 1 | -4 | 2 | 2 | 2 |
| 498 | 0 | 1 | 0  | 2 | 2 | 2 |
| 499 | 0 | 1 | 7  | 1 | 2 | 2 |
| 500 | 0 | 1 | -2 | 2 | 2 | 2 |
| 501 | 0 | 1 | 6  | 1 | 2 | 2 |
| 502 | 0 | 1 | 2  | 2 | 2 | 2 |
| 503 | 0 | 1 | 2  | 2 | 2 | 2 |
| 504 | 0 | 1 | 3  | 2 | 2 | 2 |
| 505 | 0 | 1 | -2 | 2 | 2 | 2 |
| 506 | 0 | 1 | -4 | 2 | 2 | 2 |
| 507 | 0 | 1 | 3  | 2 | 2 | 2 |
| 508 | 0 | 1 | 3  | 2 | 2 | 2 |
| 509 | 0 | 1 | -7 | 1 | 2 | 2 |
| 510 | 0 | 0 | 3  | 2 | 2 | 2 |
| 511 | 0 | 1 | -1 | 2 | 2 | 2 |
| 512 | 0 | 1 | 2  | 2 | 2 | 2 |
| 513 | 0 | 1 | 1  | 2 | 2 | 2 |
| 514 | 0 | 1 | 7  | 1 | 2 | 2 |
| 515 | 0 | 1 | -2 | 2 | 2 | 2 |
| 516 | 0 | 1 | 2  | 2 | 2 | 2 |
| 517 | 0 | 1 | -1 | 2 | 2 | 2 |
| 518 | 0 | 1 | -2 | 2 | 2 | 2 |
| 519 | 0 | 1 | 0  | 2 | 2 | 2 |
| 520 | 0 | 1 | 3  | 2 | 2 | 2 |
| 521 | 1 | 3 | 0  | 2 | 2 | 2 |
| 522 | 0 | 1 | 3  | 2 | 2 | 2 |
| 523 | 0 | 1 | -1 | 2 | 2 | 2 |
| 524 | 0 | 1 | -3 | 2 | 2 | 2 |
| 525 | 0 | 1 | 2  | 2 | 2 | 2 |
| 526 | 0 | 1 | 0  | 2 | 2 | 2 |
| 527 | 1 | 2 | -7 | 1 | 2 | 2 |
| 528 | 0 | 1 | 6  | 1 | 2 | 2 |
| 529 | 1 | 2 | 4  | 2 | 2 | 2 |
| 530 | 1 | 4 | -8 | 1 | 2 | 2 |
| 531 | 0 | 1 | 8  | 1 | 2 | 2 |

|     |   |   |     |   |   |   |
|-----|---|---|-----|---|---|---|
| 532 | 1 | 3 | 0   | 2 | 2 | 2 |
| 533 | 1 | 3 | -6  | 1 | 2 | 2 |
| 534 | 1 | 3 | 5   | 1 | 2 | 2 |
| 535 | 1 | 2 | 0   | 2 | 2 | 2 |
| 536 | 1 | 2 | 8   | 1 | 2 | 2 |
| 537 | 0 | 1 | 3   | 2 | 2 | 2 |
| 538 | 1 | 3 | -6  | 1 | 2 | 2 |
| 539 | 1 | 3 | 2   | 2 | 2 | 2 |
| 540 | 1 | 4 | 4   | 2 | 2 | 2 |
| 541 | 1 | 2 | 7   | 1 | 2 | 2 |
| 542 | 1 | 2 | 7   | 1 | 2 | 2 |
| 543 | 1 | 2 | 4   | 2 | 2 | 2 |
| 544 | 1 | 2 | -6  | 1 | 2 | 2 |
| 545 | 1 | 4 | 5   | 1 | 2 | 2 |
| 546 | 1 | 3 | -5  | 1 | 2 | 2 |
| 547 | 1 | 3 | -31 | 1 | 1 | 1 |
| 548 | 1 | 3 | 2   | 2 | 2 | 2 |
| 549 | 1 | 4 | -1  | 2 | 2 | 2 |
| 550 | 1 | 3 | 20  | 1 | 1 | 1 |
| 551 | 1 | 4 | -1  | 2 | 2 | 2 |
| 552 | 1 | 3 | -2  | 2 | 2 | 2 |
| 553 | 1 | 2 | -4  | 2 | 2 | 2 |
| 554 | 1 | 4 | -6  | 1 | 2 | 2 |
| 555 | 1 | 4 | 0   | 2 | 2 | 2 |
| 556 | 1 | 2 | 2   | 2 | 2 | 2 |
| 557 | 1 | 3 | -1  | 2 | 2 | 2 |
| 558 | 1 | 2 | -6  | 1 | 2 | 2 |
| 559 | 1 | 2 | -2  | 2 | 2 | 2 |
| 560 | 1 | 4 | 2   | 2 | 2 | 2 |
| 561 | 1 | 3 | -9  | 1 | 2 | 2 |
| 562 | 1 | 4 | 11  | 1 | 1 | 2 |
| 563 | 1 | 4 | 1   | 2 | 2 | 2 |
| 564 | 0 | 1 | -12 | 1 | 1 | 2 |
| 565 | 1 | 4 | 21  | 1 | 1 | 1 |
| 566 | 1 | 4 | 4   | 2 | 2 | 2 |
| 567 | 1 | 4 | 1   | 2 | 2 | 2 |
| 568 | 1 | 4 | -3  | 2 | 2 | 2 |
| 569 | 1 | 4 | 8   | 1 | 2 | 2 |

|     |   |   |     |   |   |   |
|-----|---|---|-----|---|---|---|
| 570 | 1 | 4 | 1   | 2 | 2 | 2 |
| 571 | 1 | 4 | -22 | 1 | 1 | 1 |
| 572 | 1 | 3 | -7  | 1 | 2 | 2 |
| 573 | 1 | 3 | -3  | 2 | 2 | 2 |
| 574 | 1 | 2 | -3  | 2 | 2 | 2 |
| 575 | 1 | 4 | -2  | 2 | 2 | 2 |
| 576 | 0 | 1 | -9  | 1 | 2 | 2 |
| 577 | 1 | 3 | 7   | 1 | 2 | 2 |
| 578 | 1 | 3 | -1  | 2 | 2 | 2 |
| 579 | 1 | 2 | -1  | 2 | 2 | 2 |
| 580 | 1 | 4 | -3  | 2 | 2 | 2 |
| 581 | 1 | 3 | -2  | 2 | 2 | 2 |
| 582 | 0 | 1 | 3   | 2 | 2 | 2 |
| 583 | 1 | 2 | 1   | 2 | 2 | 2 |
| 584 | 1 | 3 | -3  | 2 | 2 | 2 |
| 585 | 1 | 4 | -4  | 2 | 2 | 2 |
| 586 | 1 | 4 | 2   | 2 | 2 | 2 |
| 587 | 0 | 1 | 2   | 2 | 2 | 2 |
| 588 | 0 | 1 | -1  | 2 | 2 | 2 |
| 589 | 0 | 0 | 4   | 2 | 2 | 2 |
| 590 | 0 | 0 | 2   | 2 | 2 | 2 |
| 591 | 0 | 0 | 0   | 2 | 2 | 2 |
| 592 | 0 | 0 | 1   | 2 | 2 | 2 |
| 593 | 0 | 0 | -1  | 2 | 2 | 2 |
| 594 | 1 | 3 | 0   | 2 | 2 | 2 |
| 595 | 1 | 4 | 8   | 1 | 2 | 2 |
| 596 | 1 | 3 | -3  | 2 | 2 | 2 |
| 597 | 1 | 4 | -1  | 2 | 2 | 2 |
| 598 | 1 | 4 | 0   | 2 | 2 | 2 |
| 599 | 1 | 3 | -5  | 1 | 2 | 2 |
| 600 | 1 | 2 | 1   | 2 | 2 | 2 |
| 601 | 1 | 3 | -5  | 1 | 2 | 2 |
| 602 | 1 | 3 | 3   | 2 | 2 | 2 |
| 603 | 1 | 3 | -1  | 2 | 2 | 2 |
| 604 | 1 | 4 | -15 | 1 | 1 | 1 |
| 605 | 1 | 3 | 0   | 2 | 2 | 2 |
| 606 | 1 | 3 | -1  | 2 | 2 | 2 |
| 607 | 1 | 4 | -5  | 1 | 2 | 2 |

|     |   |   |    |   |   |   |
|-----|---|---|----|---|---|---|
| 608 | 1 | 3 | -4 | 2 | 2 | 2 |
| 609 | 1 | 3 | 2  | 2 | 2 | 2 |
| 610 | 1 | 4 | 1  | 2 | 2 | 2 |
| 611 | 1 | 3 | 2  | 2 | 2 | 2 |
| 612 | 1 | 4 | -2 | 2 | 2 | 2 |
| 613 | 1 | 4 | -2 | 2 | 2 | 2 |
| 614 | 1 | 4 | -8 | 1 | 2 | 2 |
| 615 | 1 | 3 | 0  | 2 | 2 | 2 |
| 616 | 1 | 3 | 1  | 2 | 2 | 2 |
| 617 | 1 | 4 | 3  | 2 | 2 | 2 |
| 618 | 1 | 4 | 1  | 2 | 2 | 2 |
| 619 | 1 | 4 | -2 | 2 | 2 | 2 |
| 620 | 1 | 4 | -1 | 2 | 2 | 2 |
| 621 | 1 | 4 | 1  | 2 | 2 | 2 |
| 622 | 1 | 4 | 1  | 2 | 2 | 2 |
| 623 | 1 | 4 | -2 | 2 | 2 | 2 |
| 624 | 1 | 4 | 2  | 2 | 2 | 2 |
| 625 | 1 | 4 | 4  | 2 | 2 | 2 |
| 626 | 1 | 3 | -2 | 2 | 2 | 2 |
| 627 | 1 | 4 | 3  | 2 | 2 | 2 |
| 628 | 1 | 3 | 3  | 2 | 2 | 2 |
| 629 | 1 | 4 | -1 | 2 | 2 | 2 |
| 630 | 1 | 4 | 7  | 1 | 2 | 2 |
| 631 | 1 | 4 | 0  | 2 | 2 | 2 |
| 632 | 1 | 3 | -1 | 2 | 2 | 2 |
| 633 | 1 | 4 | 3  | 2 | 2 | 2 |
| 634 | 1 | 3 | 7  | 1 | 2 | 2 |
| 635 | 1 | 4 | -3 | 2 | 2 | 2 |
| 636 | 1 | 4 | 6  | 1 | 2 | 2 |
| 637 | 1 | 4 | 2  | 2 | 2 | 2 |
| 638 | 1 | 3 | 1  | 2 | 2 | 2 |
| 639 | 1 | 4 | 1  | 2 | 2 | 2 |
| 640 | 1 | 3 | -8 | 1 | 2 | 2 |
| 641 | 1 | 3 | 0  | 2 | 2 | 2 |
| 642 | 1 | 4 | -9 | 1 | 2 | 2 |
| 643 | 1 | 4 | 0  | 2 | 2 | 2 |
| 644 | 1 | 3 | 0  | 2 | 2 | 2 |
| 645 | 1 | 4 | -1 | 2 | 2 | 2 |

|     |   |   |     |   |   |   |
|-----|---|---|-----|---|---|---|
| 646 | 1 | 2 | 4   | 2 | 2 | 2 |
| 647 | 1 | 3 | 2   | 2 | 2 | 2 |
| 648 | 1 | 4 | 4   | 2 | 2 | 2 |
| 649 | 1 | 4 | 3   | 2 | 2 | 2 |
| 650 | 1 | 3 | 1   | 2 | 2 | 2 |
| 651 | 1 | 4 | 8   | 1 | 2 | 2 |
| 652 | 1 | 4 | 5   | 1 | 2 | 2 |
| 653 | 1 | 4 | 6   | 1 | 2 | 2 |
| 654 | 1 | 4 | -2  | 2 | 2 | 2 |
| 655 | 1 | 2 | -1  | 2 | 2 | 2 |
| 656 | 1 | 3 | -7  | 1 | 2 | 2 |
| 657 | 1 | 4 | -1  | 2 | 2 | 2 |
| 658 | 1 | 3 | 1   | 2 | 2 | 2 |
| 659 | 1 | 4 | -12 | 1 | 1 | 2 |
| 660 | 1 | 4 | -3  | 2 | 2 | 2 |
| 661 | 1 | 4 | -21 | 1 | 1 | 1 |
| 662 | 1 | 3 | 2   | 2 | 2 | 2 |
| 663 | 1 | 4 | -4  | 2 | 2 | 2 |
| 664 | 1 | 3 | -5  | 1 | 2 | 2 |
| 665 | 1 | 4 | -8  | 1 | 2 | 2 |
| 666 | 1 | 4 | 3   | 2 | 2 | 2 |
| 667 | 1 | 3 | 6   | 1 | 2 | 2 |
| 668 | 1 | 2 | -6  | 1 | 2 | 2 |
| 669 | 1 | 4 | -2  | 2 | 2 | 2 |
| 670 | 1 | 4 | -6  | 1 | 2 | 2 |
| 671 | 1 | 4 | -1  | 2 | 2 | 2 |
| 672 | 1 | 4 | 2   | 2 | 2 | 2 |
| 673 | 1 | 3 | -7  | 1 | 2 | 2 |
| 674 | 1 | 4 | -1  | 2 | 2 | 2 |
| 675 | 1 | 2 | -7  | 1 | 2 | 2 |
| 676 | 1 | 4 | 0   | 2 | 2 | 2 |
| 677 | 0 | 0 | 5   | 1 | 2 | 2 |
| 678 | 0 | 1 | -1  | 2 | 2 | 2 |
| 679 | 0 | 1 | 4   | 2 | 2 | 2 |
| 680 | 0 | 1 | -3  | 2 | 2 | 2 |
| 681 | 0 | 1 | 1   | 2 | 2 | 2 |
| 682 | 0 | 1 | -2  | 2 | 2 | 2 |
| 683 | 0 | 1 | 1   | 2 | 2 | 2 |

|     |   |   |     |   |   |   |
|-----|---|---|-----|---|---|---|
| 684 | 0 | 1 | -2  | 2 | 2 | 2 |
| 685 | 0 | 1 | -1  | 2 | 2 | 2 |
| 686 | 0 | 1 | 3   | 2 | 2 | 2 |
| 687 | 0 | 0 | 0   | 2 | 2 | 2 |
| 688 | 0 | 1 | 0   | 2 | 2 | 2 |
| 689 | 0 | 0 | -3  | 2 | 2 | 2 |
| 690 | 0 | 1 | -4  | 2 | 2 | 2 |
| 691 | 1 | 2 | -7  | 1 | 2 | 2 |
| 692 | 0 | 1 | 3   | 2 | 2 | 2 |
| 693 | 0 | 1 | -1  | 2 | 2 | 2 |
| 694 | 0 | 1 | 2   | 2 | 2 | 2 |
| 695 | 0 | 1 | -3  | 2 | 2 | 2 |
| 696 | 0 | 1 | 1   | 2 | 2 | 2 |
| 697 | 0 | 1 | 2   | 2 | 2 | 2 |
| 698 | 0 | 1 | -3  | 2 | 2 | 2 |
| 699 | 0 | 1 | -4  | 2 | 2 | 2 |
| 700 | 0 | 1 | -10 | 1 | 1 | 2 |
| 701 | 0 | 1 | -1  | 2 | 2 | 2 |
| 702 | 0 | 1 | -2  | 2 | 2 | 2 |
| 703 | 1 | 4 | 15  | 1 | 1 | 1 |
| 704 | 1 | 4 | -3  | 2 | 2 | 2 |
| 705 | 1 | 4 | -3  | 2 | 2 | 2 |
| 706 | 1 | 4 | -9  | 1 | 2 | 2 |
| 707 | 1 | 4 | -6  | 1 | 2 | 2 |
| 708 | 1 | 3 | 1   | 2 | 2 | 2 |
| 709 | 1 | 3 | 3   | 2 | 2 | 2 |
| 710 | 1 | 4 | -2  | 2 | 2 | 2 |
| 711 | 0 | 1 | -11 | 1 | 1 | 2 |
| 712 | 1 | 3 | -2  | 2 | 2 | 2 |
| 713 | 1 | 4 | -20 | 1 | 1 | 1 |
| 714 | 1 | 2 | -3  | 2 | 2 | 2 |
| 715 | 1 | 3 | -5  | 1 | 2 | 2 |
| 716 | 1 | 3 | -2  | 2 | 2 | 2 |
| 717 | 1 | 3 | 4   | 2 | 2 | 2 |
| 718 | 1 | 3 | 0   | 2 | 2 | 2 |
| 719 | 0 | 0 | 2   | 2 | 2 | 2 |
| 720 | 1 | 4 | -2  | 2 | 2 | 2 |
| 721 | 1 | 4 | -1  | 2 | 2 | 2 |



|     |   |   |     |   |   |   |
|-----|---|---|-----|---|---|---|
| 722 | 1 | 4 | -5  | 1 | 2 | 2 |
| 723 | 1 | 4 | 1   | 2 | 2 | 2 |
| 724 | 1 | 3 | 1   | 2 | 2 | 2 |
| 725 | 1 | 4 | -12 | 1 | 1 | 2 |
| 726 | 1 | 4 | 0   | 2 | 2 | 2 |
| 727 | 1 | 2 | -3  | 2 | 2 | 2 |
| 728 | 1 | 2 | -5  | 1 | 2 | 2 |
| 729 | 1 | 3 | 4   | 2 | 2 | 2 |
| 730 | 1 | 3 | -3  | 2 | 2 | 2 |
| 731 | 1 | 3 | 4   | 2 | 2 | 2 |
| 732 | 1 | 4 | 2   | 2 | 2 | 2 |
| 733 | 1 | 4 | -10 | 1 | 1 | 2 |
| 734 | 1 | 3 | 17  | 1 | 1 | 1 |
| 735 | 1 | 4 | -19 | 1 | 1 | 1 |
| 736 | 1 | 4 | -6  | 1 | 2 | 2 |
| 737 | 1 | 4 | 4   | 2 | 2 | 2 |
| 738 | 1 | 4 | -5  | 1 | 2 | 2 |
| 739 | 1 | 3 | -2  | 2 | 2 | 2 |
| 740 | 1 | 4 | 4   | 2 | 2 | 2 |
| 741 | 1 | 3 | 4   | 2 | 2 | 2 |
| 742 | 1 | 2 | -4  | 2 | 2 | 2 |
| 743 | 1 | 3 | 3   | 2 | 2 | 2 |
| 744 | 1 | 3 | -6  | 1 | 2 | 2 |
| 745 | 1 | 3 | 4   | 2 | 2 | 2 |
| 746 | 1 | 3 | -4  | 2 | 2 | 2 |
| 747 | 1 | 4 | 2   | 2 | 2 | 2 |
| 748 | 1 | 2 | -5  | 1 | 2 | 2 |
| 749 | 1 | 4 | -3  | 2 | 2 | 2 |
| 750 | 1 | 3 | 0   | 2 | 2 | 2 |
| 751 | 0 | 1 | 2   | 2 | 2 | 2 |
| 752 | 0 | 0 | 1   | 2 | 2 | 2 |
| 753 | 0 | 0 | -5  | 1 | 2 | 2 |
| 754 | 0 | 1 | -3  | 2 | 2 | 2 |
| 755 | 0 | 0 | 0   | 2 | 2 | 2 |
| 756 | 0 | 1 | -2  | 2 | 2 | 2 |
| 757 | 0 | 0 | -2  | 2 | 2 | 2 |
| 758 | 1 | 4 | -1  | 2 | 2 | 2 |
| 759 | 1 | 4 | -2  | 2 | 2 | 2 |

|     |   |   |     |   |   |   |
|-----|---|---|-----|---|---|---|
| 760 | 1 | 4 | -11 | 1 | 1 | 2 |
| 761 | 1 | 3 | 5   | 1 | 2 | 2 |
| 762 | 1 | 4 | 4   | 2 | 2 | 2 |
| 763 | 1 | 3 | 0   | 2 | 2 | 2 |
| 764 | 1 | 4 | 7   | 1 | 2 | 2 |
| 765 | 1 | 4 | 11  | 1 | 1 | 2 |
| 766 | 1 | 4 | 0   | 2 | 2 | 2 |
| 767 | 1 | 4 | 1   | 2 | 2 | 2 |
| 768 | 1 | 2 | -4  | 2 | 2 | 2 |
| 769 | 1 | 4 | 7   | 1 | 2 | 2 |
| 770 | 1 | 3 | 0   | 2 | 2 | 2 |
| 771 | 1 | 3 | -2  | 2 | 2 | 2 |
| 772 | 1 | 4 | 9   | 1 | 2 | 2 |
| 773 | 1 | 4 | 1   | 2 | 2 | 2 |
| 774 | 1 | 4 | -3  | 2 | 2 | 2 |
| 775 | 1 | 4 | -4  | 2 | 2 | 2 |
| 776 | 1 | 3 | -8  | 1 | 2 | 2 |
| 777 | 1 | 4 | -2  | 2 | 2 | 2 |
| 778 | 1 | 4 | -5  | 1 | 2 | 2 |
| 779 | 1 | 3 | 1   | 2 | 2 | 2 |
| 780 | 1 | 4 | -6  | 1 | 2 | 2 |
| 781 | 1 | 4 | 0   | 2 | 2 | 2 |
| 782 | 1 | 4 | -2  | 2 | 2 | 2 |
| 783 | 1 | 4 | -7  | 1 | 2 | 2 |
| 784 | 1 | 2 | 5   | 1 | 2 | 2 |
| 785 | 1 | 4 | 2   | 2 | 2 | 2 |
| 786 | 1 | 4 | -4  | 2 | 2 | 2 |
| 787 | 1 | 3 | -4  | 2 | 2 | 2 |
| 788 | 1 | 4 | -2  | 2 | 2 | 2 |
| 789 | 1 | 3 | -4  | 2 | 2 | 2 |
| 790 | 1 | 4 | 3   | 2 | 2 | 2 |
| 791 | 1 | 3 | 0   | 2 | 2 | 2 |
| 792 | 1 | 4 | 2   | 2 | 2 | 2 |
| 793 | 1 | 3 | 1   | 2 | 2 | 2 |
| 794 | 1 | 3 | -5  | 1 | 2 | 2 |
| 795 | 1 | 4 | -3  | 2 | 2 | 2 |
| 796 | 1 | 4 | -3  | 2 | 2 | 2 |
| 797 | 1 | 4 | -5  | 1 | 2 | 2 |

|     |   |   |     |   |   |   |
|-----|---|---|-----|---|---|---|
| 798 | 0 | 1 | -16 | 1 | 1 | 1 |
| 799 | 1 | 4 | 5   | 1 | 2 | 2 |
| 800 | 1 | 4 | 1   | 2 | 2 | 2 |
| 801 | 1 | 4 | 0   | 2 | 2 | 2 |
| 802 | 0 | 1 | 5   | 1 | 2 | 2 |
| 803 | 1 | 3 | 13  | 1 | 1 | 2 |
| 804 | 1 | 4 | 4   | 2 | 2 | 2 |
| 805 | 1 | 3 | -16 | 1 | 1 | 1 |
| 806 | 0 | 1 | 4   | 2 | 2 | 2 |
| 807 | 1 | 4 | -5  | 1 | 2 | 2 |
| 808 | 1 | 2 | 0   | 2 | 2 | 2 |
| 809 | 1 | 4 | -7  | 1 | 2 | 2 |
| 810 | 0 | 1 | 2   | 2 | 2 | 2 |
| 811 | 1 | 4 | -3  | 2 | 2 | 2 |
| 812 | 1 | 4 | -4  | 2 | 2 | 2 |
| 813 | 1 | 4 | 4   | 2 | 2 | 2 |
| 814 | 1 | 4 | -2  | 2 | 2 | 2 |
| 815 | 1 | 3 | 1   | 2 | 2 | 2 |
| 816 | 1 | 2 | -5  | 1 | 2 | 2 |
| 817 | 1 | 4 | 5   | 1 | 2 | 2 |
| 818 | 1 | 3 | -2  | 2 | 2 | 2 |
| 819 | 1 | 4 | 4   | 2 | 2 | 2 |
| 820 | 1 | 4 | 5   | 1 | 2 | 2 |
| 821 | 1 | 4 | -1  | 2 | 2 | 2 |
| 822 | 1 | 3 | 6   | 1 | 2 | 2 |
| 823 | 1 | 3 | 4   | 2 | 2 | 2 |
| 824 | 1 | 3 | 0   | 2 | 2 | 2 |
| 825 | 1 | 4 | -13 | 1 | 1 | 2 |
| 826 | 0 | 1 | 2   | 2 | 2 | 2 |
| 827 | 1 | 4 | 0   | 2 | 2 | 2 |
| 828 | 1 | 4 | 4   | 2 | 2 | 2 |
| 829 | 1 | 4 | 1   | 2 | 2 | 2 |
| 830 | 1 | 4 | 2   | 2 | 2 | 2 |
| 831 | 1 | 4 | 2   | 2 | 2 | 2 |
| 832 | 1 | 3 | 1   | 2 | 2 | 2 |
| 833 | 1 | 3 | 1   | 2 | 2 | 2 |
| 834 | 1 | 3 | -4  | 2 | 2 | 2 |
| 835 | 1 | 3 | 1   | 2 | 2 | 2 |

|     |   |   |    |   |   |   |
|-----|---|---|----|---|---|---|
| 836 | 1 | 4 | -4 | 2 | 2 | 2 |
| 837 | 1 | 4 | 0  | 2 | 2 | 2 |
| 838 | 1 | 4 | -7 | 1 | 2 | 2 |
| 839 | 1 | 4 | 1  | 2 | 2 | 2 |
| 840 | 1 | 3 | -2 | 2 | 2 | 2 |
| 841 | 1 | 2 | 2  | 2 | 2 | 2 |
| 842 | 1 | 4 | 2  | 2 | 2 | 2 |
| 843 | 1 | 3 | 3  | 2 | 2 | 2 |
| 844 | 1 | 4 | 1  | 2 | 2 | 2 |
| 845 | 1 | 4 | -1 | 2 | 2 | 2 |
| 846 | 1 | 2 | 5  | 1 | 2 | 2 |
| 847 | 1 | 3 | 1  | 2 | 2 | 2 |
| 848 | 1 | 2 | -9 | 1 | 2 | 2 |
| 849 | 1 | 4 | -5 | 1 | 2 | 2 |
| 850 | 1 | 4 | 1  | 2 | 2 | 2 |
| 851 | 1 | 4 | -2 | 2 | 2 | 2 |
| 852 | 1 | 3 | -2 | 2 | 2 | 2 |
| 853 | 1 | 3 | -7 | 1 | 2 | 2 |
| 854 | 1 | 4 | 0  | 2 | 2 | 2 |
| 855 | 1 | 4 | -1 | 2 | 2 | 2 |
| 856 | 0 | 1 | -3 | 2 | 2 | 2 |
| 857 | 0 | 1 | 5  | 1 | 2 | 2 |
| 858 | 0 | 1 | 3  | 2 | 2 | 2 |
| 859 | 0 | 1 | 0  | 2 | 2 | 2 |
| 860 | 0 | 1 | -1 | 2 | 2 | 2 |
| 861 | 0 | 1 | -1 | 2 | 2 | 2 |
| 862 | 0 | 0 | 2  | 2 | 2 | 2 |
| 863 | 0 | 1 | 3  | 2 | 2 | 2 |
| 864 | 0 | 1 | -3 | 2 | 2 | 2 |
| 865 | 0 | 1 | -1 | 2 | 2 | 2 |
| 866 | 0 | 1 | 7  | 1 | 2 | 2 |
| 867 | 0 | 1 | 3  | 2 | 2 | 2 |
| 868 | 0 | 1 | 6  | 1 | 2 | 2 |
| 869 | 0 | 1 | 0  | 2 | 2 | 2 |
| 870 | 0 | 1 | 8  | 1 | 2 | 2 |
| 871 | 0 | 1 | -8 | 1 | 2 | 2 |
| 872 | 0 | 1 | 2  | 2 | 2 | 2 |
| 873 | 0 | 1 | -5 | 1 | 2 | 2 |

|     |   |   |    |   |   |   |
|-----|---|---|----|---|---|---|
| 874 | 0 | 1 | 4  | 2 | 2 | 2 |
| 875 | 0 | 1 | 5  | 1 | 2 | 2 |
| 876 | 0 | 1 | -9 | 1 | 2 | 2 |
| 877 | 0 | 1 | 2  | 2 | 2 | 2 |
| 878 | 0 | 1 | -1 | 2 | 2 | 2 |
| 879 | 0 | 1 | 0  | 2 | 2 | 2 |
| 880 | 0 | 1 | 0  | 2 | 2 | 2 |
| 881 | 0 | 1 | 9  | 1 | 2 | 2 |
| 882 | 0 | 1 | 2  | 2 | 2 | 2 |
| 883 | 0 | 1 | -1 | 2 | 2 | 2 |
| 884 | 0 | 0 | 4  | 2 | 2 | 2 |
| 885 | 1 | 4 | 0  | 2 | 2 | 2 |
| 886 | 1 | 4 | 0  | 2 | 2 | 2 |
| 887 | 1 | 4 | -1 | 2 | 2 | 2 |
| 888 | 1 | 3 | 1  | 2 | 2 | 2 |
| 889 | 1 | 2 | 2  | 2 | 2 | 2 |
| 890 | 1 | 3 | 7  | 1 | 2 | 2 |
| 891 | 1 | 2 | -1 | 2 | 2 | 2 |
| 892 | 1 | 3 | -2 | 2 | 2 | 2 |
| 893 | 1 | 4 | -9 | 1 | 2 | 2 |
| 894 | 1 | 2 | -4 | 2 | 2 | 2 |
| 895 | 1 | 2 | 2  | 2 | 2 | 2 |
| 896 | 1 | 4 | -3 | 2 | 2 | 2 |
| 897 | 1 | 4 | -5 | 1 | 2 | 2 |
| 898 | 1 | 3 | -6 | 1 | 2 | 2 |
| 899 | 1 | 3 | -2 | 2 | 2 | 2 |
| 900 | 1 | 4 | -3 | 2 | 2 | 2 |
| 901 | 1 | 3 | -6 | 1 | 2 | 2 |
| 902 | 1 | 4 | -6 | 1 | 2 | 2 |
| 903 | 1 | 3 | -1 | 2 | 2 | 2 |
| 904 | 0 | 1 | 2  | 2 | 2 | 2 |
| 905 | 1 | 4 | 2  | 2 | 2 | 2 |
| 906 | 1 | 4 | -2 | 2 | 2 | 2 |
| 907 | 1 | 3 | -2 | 2 | 2 | 2 |
| 908 | 1 | 3 | 8  | 1 | 2 | 2 |
| 909 | 1 | 4 | 5  | 1 | 2 | 2 |
| 910 | 1 | 2 | -2 | 2 | 2 | 2 |
| 911 | 1 | 2 | -1 | 2 | 2 | 2 |

|     |   |   |    |   |   |   |
|-----|---|---|----|---|---|---|
| 912 | 1 | 4 | 3  | 2 | 2 | 2 |
| 913 | 0 | 0 | -3 | 2 | 2 | 2 |
| 914 | 1 | 3 | -1 | 2 | 2 | 2 |
| 915 | 1 | 2 | -6 | 1 | 2 | 2 |
| 916 | 1 | 4 | 15 | 1 | 1 | 1 |
| 917 | 1 | 4 | -4 | 2 | 2 | 2 |
| 918 | 1 | 4 | -3 | 2 | 2 | 2 |
| 919 | 1 | 4 | 2  | 2 | 2 | 2 |
| 920 | 0 | 1 | 3  | 2 | 2 | 2 |
| 921 | 1 | 4 | -4 | 2 | 2 | 2 |
| 922 | 1 | 3 | -1 | 2 | 2 | 2 |
| 923 | 1 | 2 | 2  | 2 | 2 | 2 |
| 924 | 1 | 2 | 3  | 2 | 2 | 2 |
| 925 | 1 | 4 | 3  | 2 | 2 | 2 |
| 926 | 1 | 4 | -3 | 2 | 2 | 2 |
| 927 | 1 | 4 | 4  | 2 | 2 | 2 |
| 928 | 1 | 2 | -4 | 2 | 2 | 2 |
| 929 | 1 | 3 | 4  | 2 | 2 | 2 |
| 930 | 0 | 1 | -1 | 2 | 2 | 2 |
| 931 | 1 | 4 | 1  | 2 | 2 | 2 |
| 932 | 1 | 4 | -1 | 2 | 2 | 2 |
| 933 | 1 | 4 | 4  | 2 | 2 | 2 |
| 934 | 1 | 4 | 2  | 2 | 2 | 2 |
| 935 | 1 | 4 | -9 | 1 | 2 | 2 |
| 936 | 1 | 3 | -1 | 2 | 2 | 2 |
| 937 | 1 | 4 | 0  | 2 | 2 | 2 |
| 938 | 1 | 2 | 2  | 2 | 2 | 2 |
| 939 | 1 | 4 | -9 | 1 | 2 | 2 |
| 940 | 1 | 4 | 6  | 1 | 2 | 2 |
| 941 | 1 | 4 | 5  | 1 | 2 | 2 |
| 942 | 0 | 1 | 1  | 2 | 2 | 2 |
| 943 | 0 | 0 | -2 | 2 | 2 | 2 |
| 944 | 0 | 0 | -5 | 1 | 2 | 2 |
| 945 | 0 | 0 | -2 | 2 | 2 | 2 |
| 946 | 0 | 0 | 0  | 2 | 2 | 2 |
| 947 | 0 | 0 | 3  | 2 | 2 | 2 |
| 948 | 0 | 0 | 4  | 2 | 2 | 2 |
| 949 | 0 | 0 | 2  | 2 | 2 | 2 |

|     |   |   |     |   |   |   |
|-----|---|---|-----|---|---|---|
| 950 | 0 | 0 | 1   | 2 | 2 | 2 |
| 951 | 0 | 0 | 1   | 2 | 2 | 2 |
| 952 | 1 | 3 | -2  | 2 | 2 | 2 |
| 953 | 1 | 4 | 3   | 2 | 2 | 2 |
| 954 | 1 | 3 | -5  | 1 | 2 | 2 |
| 955 | 1 | 3 | 6   | 1 | 2 | 2 |
| 956 | 1 | 4 | -6  | 1 | 2 | 2 |
| 957 | 1 | 3 | 3   | 2 | 2 | 2 |
| 958 | 1 | 4 | -2  | 2 | 2 | 2 |
| 959 | 1 | 2 | -6  | 1 | 2 | 2 |
| 960 | 1 | 2 | 15  | 1 | 1 | 1 |
| 961 | 1 | 4 | -1  | 2 | 2 | 2 |
| 962 | 1 | 4 | -7  | 1 | 2 | 2 |
| 963 | 1 | 4 | 1   | 2 | 2 | 2 |
| 964 | 1 | 2 | -3  | 2 | 2 | 2 |
| 965 | 1 | 4 | 5   | 1 | 2 | 2 |
| 966 | 1 | 4 | 0   | 2 | 2 | 2 |
| 967 | 1 | 4 | -16 | 1 | 1 | 1 |
| 968 | 1 | 2 | -28 | 1 | 1 | 1 |
| 969 | 1 | 4 | 31  | 1 | 1 | 1 |
| 970 | 1 | 4 | 13  | 1 | 1 | 2 |
| 971 | 1 | 3 | 25  | 1 | 1 | 1 |
| 972 | 1 | 4 | -16 | 1 | 1 | 1 |
| 973 | 0 | 0 | -10 | 1 | 1 | 2 |
| 974 | 1 | 3 | 16  | 1 | 1 | 1 |
| 975 | 1 | 3 | 10  | 1 | 1 | 2 |
| 976 | 1 | 4 | 10  | 1 | 1 | 2 |
| 977 | 1 | 2 | 0   | 2 | 2 | 2 |
| 978 | 1 | 4 | -5  | 1 | 2 | 2 |
| 979 | 1 | 4 | 3   | 2 | 2 | 2 |
| 980 | 1 | 2 | -1  | 2 | 2 | 2 |
| 981 | 1 | 2 | -1  | 2 | 2 | 2 |
| 982 | 1 | 3 | 0   | 2 | 2 | 2 |
| 983 | 1 | 4 | -6  | 1 | 2 | 2 |
| 984 | 1 | 3 | 4   | 2 | 2 | 2 |
| 985 | 1 | 3 | 7   | 1 | 2 | 2 |
| 986 | 1 | 2 | 9   | 1 | 2 | 2 |
| 987 | 1 | 4 | 0   | 2 | 2 | 2 |

|      |   |   |     |   |   |   |
|------|---|---|-----|---|---|---|
| 988  | 1 | 4 | 4   | 2 | 2 | 2 |
| 989  | 1 | 3 | -2  | 2 | 2 | 2 |
| 990  | 1 | 3 | 10  | 1 | 1 | 2 |
| 991  | 1 | 4 | -12 | 1 | 1 | 2 |
| 992  | 1 | 3 | -2  | 2 | 2 | 2 |
| 993  | 1 | 2 | 0   | 2 | 2 | 2 |
| 994  | 1 | 2 | 0   | 2 | 2 | 2 |
| 995  | 1 | 2 | 26  | 1 | 1 | 1 |
| 996  | 0 | 1 | 0   | 2 | 2 | 2 |
| 997  | 0 | 0 | 6   | 1 | 2 | 2 |
| 998  | 1 | 2 | 4   | 2 | 2 | 2 |
| 999  | 0 | 1 | -5  | 1 | 2 | 2 |
| 1000 | 1 | 2 | 2   | 2 | 2 | 2 |
| 1001 | 1 | 4 | 0   | 2 | 2 | 2 |
| 1002 | 1 | 3 | 1   | 2 | 2 | 2 |
| 1003 | 1 | 2 | -1  | 2 | 2 | 2 |
| 1004 | 1 | 4 | 3   | 2 | 2 | 2 |
| 1005 | 1 | 4 | 2   | 2 | 2 | 2 |
| 1006 | 1 | 2 | 2   | 2 | 2 | 2 |
| 1007 | 0 | 0 | 7   | 1 | 2 | 2 |
| 1008 | 1 | 4 | -8  | 1 | 2 | 2 |
| 1009 | 1 | 4 | -36 | 1 | 1 | 1 |
| 1010 | 1 | 4 | 9   | 1 | 2 | 2 |
| 1011 | 1 | 2 | 3   | 2 | 2 | 2 |
| 1012 | 1 | 3 | 4   | 2 | 2 | 2 |
| 1013 | 1 | 2 | -2  | 2 | 2 | 2 |
| 1014 | 1 | 2 | -4  | 2 | 2 | 2 |
| 1015 | 1 | 3 | -2  | 2 | 2 | 2 |
| 1016 | 1 | 4 | 23  | 1 | 1 | 1 |
| 1017 | 1 | 2 | -1  | 2 | 2 | 2 |
| 1018 | 1 | 4 | -3  | 2 | 2 | 2 |
| 1019 | 0 | 0 | 9   | 1 | 2 | 2 |
| 1020 | 1 | 2 | 13  | 1 | 1 | 2 |
| 1021 | 1 | 4 | 11  | 1 | 1 | 2 |
| 1022 | 1 | 4 | 1   | 2 | 2 | 2 |
