# Supplementary material for: Elevated Interarm Systolic Blood Pressure Difference Is Positively Associated with Increased Likelihood of Coronary Artery Disease
Source: Int J Hypertens. 2021 Jul 21;2021:5577957. doi: 10.1155/2021/5577957 (PMC8321749; doi:10.1155/2021/5577957)
Supplement: Supplementary Materials — Supplementary Table 1: relationship between IASBPD and coronary artery disease using a univariate logistic regression model. Supplementary Table 2: relationship between IASBPD and coronary artery disease using a multiple logistic regression model. Original data: mainly recorded the original data related to this article. [file 5577957.f1.zip]

Archive with 2 entries (2 files):
- original data.pdf
- Supplementary Tables.docx
